# Supplementary material
Source: publisher figshare collection journal article supplement (https://frontiersin.figshare.com/ndownloader/files/30725153)
Supplement: Supplementary file [file 30725153]

## Supplementary Figures and Tables

|                                                                                                                                                                                                                                                   |           |
|---------------------------------------------------------------------------------------------------------------------------------------------------------------------------------------------------------------------------------------------------|-----------|
| <b>Supplementary Table 1: Search Strategy and Supporting Documentation .....</b>                                                                                                                                                                  | <b>2</b>  |
| <b>Supplementary Table 2: Excluded studies and reason for study exclusion.....</b>                                                                                                                                                                | <b>12</b> |
| <b>Supplementary Table 3 (a) Quality assessment of observational studies. ....</b>                                                                                                                                                                | <b>20</b> |
| <b>Supplementary Table 3 (b) Quality assessment of case-control studies.....</b>                                                                                                                                                                  | <b>23</b> |
| <b>Supplementary Table 3 (c) Quality assessment of qualitative and case-series studies. ....</b>                                                                                                                                                  | <b>24</b> |
| <b>Supplementary Table 4: Summary of study characteristics, including details on study sample, design, methods and results on associative values of sex/gender, age and injury severity variables on clinical and non-clinical outcomes. ....</b> | <b>24</b> |
| <b>Supplementary Table 5: Summary of study characteristics, samples, and results pertaining to sex/gender and outcomes. ....</b>                                                                                                                  | <b>72</b> |
| <b>Supplementary Figure 1: Effect sizes of factors/variance explained by factors investigated in relation to post-TBI outcomes in multivariate regression analyses.....</b>                                                                       | <b>87</b> |
| <b>.....</b>                                                                                                                                                                                                                                      | <b>88</b> |

## **Supplementary Table 1: Search Strategy and Supporting Documentation**

### **SEARCH DETAILS**

Searches conducted in Cochrane Central Register of Controlled Trials (CENTRAL), CINAHL, Embase, Ovid MEDLINE(R) (including Epub Ahead of Print, In-Process & Other Non-Indexed Citations, Ovid MEDLINE(R) Daily), PsycINFO, and Web of Science.

Search strategies included the use of textwords and subject headings (e.g. MeSH, Emtree) related to (1) traumatic brain injury and (2) sex or (3) gender. All searches were conducted from inception of the database to February 2018 and were subsequently updated in September 23 2019. Searches were limited to human studies, and English language papers when possible. Case reports were excluded when possible.

#### **The following steps were conducted to establish the updated results to screen:**

- Each database search was re-run (with minor edits if required)
- All results were exported into Endnote, and compared to the original search results form 2018. Duplicates were removed for each database (e.g. the original Embase results were compared to the updated Embase results, and duplicate records were removed to only keep the “new” records) – these results are reported below under “UPDATED SEARCH PRE-DUPLICATE REMOVAL” section.
- The remaining “new” results were then screened for duplicates internally, and against the original results as a whole. These results are listed below, under the “UPDATED NEW RESULTS POST-DUPLICATE REMOVAL” section.

### **UPDATED SEARCH PRE-DUPLICATE REMOVAL**

*TOTAL Results: 13010 (3578 NEW)*

Cochrane Central Register of Controlled Trials (CENTRAL): 3425 (1924 NEW)

CINAHL: 850 (312 NEW)

Embase: 3095 (439 NEW)

Ovid MEDLINE(R): 2551 (385 NEW)

PsycINFO: 643 (77 NEW)

Web of Science: 2446 (441 NEW)

### **UPDATED NEW RESULTS POST-DUPLICATE REMOVAL**

*TOTAL Results: 2913*

Cochrane Central Register of Controlled Trials (CENTRAL): 1898

CINAHL: 211

Embase: 375

Ovid MEDLINE(R): 193

PsycINFO: 27

Web of Science: 209

## **SEARCH STRATEGIES**

**Ovid MEDLINE(R) Epub Ahead of Print, In-Process & Other Non-Indexed Citations, Ovid MEDLINE(R) Daily and Ovid MEDLINE(R) <1946 to September 18, 2019>**

| Search history sorted by search number ascending |                                                                                                                                                                                             |         |          |
|--------------------------------------------------|---------------------------------------------------------------------------------------------------------------------------------------------------------------------------------------------|---------|----------|
| #                                                | Searches                                                                                                                                                                                    | Results | Type     |
| 1                                                | Brain Injuries/                                                                                                                                                                             | 51277   | Advanced |
| 2                                                | exp Brain Injuries, Traumatic/                                                                                                                                                              | 12188   | Advanced |
| 3                                                | exp Brain Concussion/                                                                                                                                                                       | 8145    | Advanced |
| 4                                                | Craniocerebral Trauma/                                                                                                                                                                      | 21788   | Advanced |
| 5                                                | tbi*2.tw,kf.                                                                                                                                                                                | 25241   | Advanced |
| 6                                                | mtbi*2.tw,kf.                                                                                                                                                                               | 2613    | Advanced |
| 7                                                | wrTBI*2.tw,kf.                                                                                                                                                                              | 13      | Advanced |
| 8                                                | concuss*.tw,kf.                                                                                                                                                                             | 8744    | Advanced |
| 9                                                | postconcuss*.tw,kf.                                                                                                                                                                         | 1296    | Advanced |
| 10                                               | ((head* or cerebr* or crani* or skull* or intracran*) adj2 (injur* or trauma* or damag* or wound* or swell* or oedema* or edema* or fracture* or contusion* or pressur*)).tw,kf.            | 84261   | Advanced |
| 11                                               | ((brain* or cerebr* or intracerebr* or crani* or intracran* or head* or subdural* or epidural* or extradural*) adj (haematoma* or hematoma* or hemorrhag* or haemorrhag* or bleed*)).tw,kf. | 49922   | Advanced |
| 12                                               | or/1-11                                                                                                                                                                                     | 189121  | Advanced |
| 13                                               | Sex Characteristics/                                                                                                                                                                        | 52303   | Advanced |
| 14                                               | exp sex distribution/                                                                                                                                                                       | 62411   | Advanced |
| 15                                               | exp Gender Identity/                                                                                                                                                                        | 18934   | Advanced |
| 16                                               | (sex adj2 (differenc* or charact*)).tw,kf.                                                                                                                                                  | 45043   | Advanced |
| 17                                               | sex-related.tw,kf.                                                                                                                                                                          | 6154    | Advanced |
| 18                                               | sex-based.tw,kf.                                                                                                                                                                            | 1458    | Advanced |
| 19                                               | (sexes adj2 (differenc* or charact*)).tw,kf.                                                                                                                                                | 1880    | Advanced |
| 20                                               | (gender adj2 (differenc* or charact*)).tw,kf.                                                                                                                                               | 38954   | Advanced |
| 21                                               | gender-related.tw,kf.                                                                                                                                                                       | 4751    | Advanced |
| 22                                               | gender-based.tw,kf.                                                                                                                                                                         | 2986    | Advanced |
| 23                                               | (male? or men or man or masculin*).ti,kf.                                                                                                                                                   | 286095  | Advanced |

|    |                                                |         |          |
|----|------------------------------------------------|---------|----------|
| 24 | (female? or women or woman or feminin*).ti,kf. | 379569  | Advanced |
| 25 | sex.ti,kf.                                     | 108081  | Advanced |
| 26 | sexes.ti,kf.                                   | 1436    | Advanced |
| 27 | gender*.ti,kf.                                 | 50705   | Advanced |
| 28 | or/13-27                                       | 873700  | Advanced |
| 29 | 12 and 28                                      | 3465    | Advanced |
| 30 | 29 not (exp animals/ not exp humans/)          | 3226    | Advanced |
| 31 | case reports/                                  | 2045653 | Advanced |
| 32 | 30 not 31                                      | 2789    | Advanced |
| 33 | limit 32 to english language                   | 2551    | Advanced |

### Cochrane Central Register of Controlled Trials <2014 to Present>

| Search history sorted by search number ascending |                                                                                                                                                                                             |         |          |
|--------------------------------------------------|---------------------------------------------------------------------------------------------------------------------------------------------------------------------------------------------|---------|----------|
| #                                                | Searches                                                                                                                                                                                    | Results | Type     |
| 1                                                | Brain Injuries/                                                                                                                                                                             | 1613    | Advanced |
| 2                                                | exp Brain Injuries, Traumatic/                                                                                                                                                              | 1860    | Advanced |
| 3                                                | exp Brain Concussion/                                                                                                                                                                       | 279     | Advanced |
| 4                                                | Craniocerebral Trauma/                                                                                                                                                                      | 296     | Advanced |
| 5                                                | tbi*2.tw,kw.                                                                                                                                                                                | 2784    | Advanced |
| 6                                                | mtbi*2.tw,kw.                                                                                                                                                                               | 311     | Advanced |
| 7                                                | wrTBI*2.tw,kw.                                                                                                                                                                              | 0       | Advanced |
| 8                                                | concuss*.tw,kw.                                                                                                                                                                             | 560     | Advanced |
| 9                                                | postconcuss*.tw,kw.                                                                                                                                                                         | 191     | Advanced |
| 10                                               | ((head* or cerebr* or crani* or skull* or intracran*) adj2 (injur* or trauma* or damag* or wound* or swell* or oedema* or edema* or fracture* or contusion* or pressur*)).tw,kw.            | 5765    | Advanced |
| 11                                               | ((brain* or cerebr* or intracerebr* or crani* or intracran* or head* or subdural* or epidural* or extradural*) adj (haematoma* or hematoma* or hemorrhag* or haemorrhag* or bleed*)).tw,kw. | 6907    | Advanced |
| 12                                               | or/1-11                                                                                                                                                                                     | 15627   | Advanced |
| 13                                               | Sex Characteristics/                                                                                                                                                                        | 1223    | Advanced |
| 14                                               | exp sex distribution/                                                                                                                                                                       | 765     | Advanced |
| 15                                               | exp Gender Identity/                                                                                                                                                                        | 255     | Advanced |
| 16                                               | (sex adj2 (differenc* or charact*)).tw,kw.                                                                                                                                                  | 5723    | Advanced |
| 17                                               | sex-related.tw,kw.                                                                                                                                                                          | 263     | Advanced |
| 18                                               | sex-based.tw,kw.                                                                                                                                                                            | 95      | Advanced |
| 19                                               | (sexes adj2 (differenc* or charact*)).tw,kw.                                                                                                                                                | 157     | Advanced |

|    |                                                |        |          |
|----|------------------------------------------------|--------|----------|
| 20 | (gender adj2 (differenc* or charact*)).tw,kw.  | 3329   | Advanced |
| 21 | gender-related.tw,kw.                          | 262    | Advanced |
| 22 | gender-based.tw,kw.                            | 189    | Advanced |
| 23 | (male? or men or man or masculin*).ti,kw.      | 228112 | Advanced |
| 24 | (female? or women or woman or feminin*).ti,kw. | 280614 | Advanced |
| 25 | sex.ti,kw.                                     | 7565   | Advanced |
| 26 | sexes.ti,kw.                                   | 19     | Advanced |
| 27 | gender*.ti,kw.                                 | 11250  | Advanced |
| 28 | or/13-27                                       | 337495 | Advanced |
| 29 | 12 and 28                                      | 3948   | Advanced |
| 30 | 29 not (exp animals/ not exp humans/)          | 3948   | Advanced |
| 31 | case reports/                                  | 0      | Advanced |
| 32 | 30 not 31                                      | 3948   | Advanced |
| 33 | limit 32 to english language                   | 3711   | Advanced |
| 34 | limit 33 to conference                         | 286    | Advanced |
| 35 | 33 not 34                                      | 3425   | Advanced |

#### Embase <1974 to 2019 September 19>

| Search history sorted by search number ascending |                                                                                                                                                                                             |         |          |
|--------------------------------------------------|---------------------------------------------------------------------------------------------------------------------------------------------------------------------------------------------|---------|----------|
| #                                                | Searches                                                                                                                                                                                    | Results | Type     |
| 1                                                | exp traumatic brain injury/                                                                                                                                                                 | 46203   | Advanced |
| 2                                                | brain injury/                                                                                                                                                                               | 86777   | Advanced |
| 3                                                | exp concussion/                                                                                                                                                                             | 10869   | Advanced |
| 4                                                | head injury/                                                                                                                                                                                | 44984   | Advanced |
| 5                                                | tbi*2.tw,kw.                                                                                                                                                                                | 42494   | Advanced |
| 6                                                | mtbi*2.tw,kw.                                                                                                                                                                               | 4505    | Advanced |
| 7                                                | wrTBI*2.tw,kw.                                                                                                                                                                              | 17      | Advanced |
| 8                                                | concuss*.tw,kw.                                                                                                                                                                             | 11735   | Advanced |
| 9                                                | postconcuss*.tw,kw.                                                                                                                                                                         | 1637    | Advanced |
| 10                                               | ((head* or cerebr* or crani* or skull* or intracran*) adj2 (injur* or trauma* or damag* or wound* or swell* or oedema* or edema* or fracture* or contusion* or pressur*)).tw,kw.            | 106366  | Advanced |
| 11                                               | ((brain* or cerebr* or intracerebr* or crani* or intracran* or head* or subdural* or epidural* or extradural*) adj (haematoma* or hematoma* or hemorrhag* or haemorrhag* or bleed*)).tw,kw. | 71026   | Advanced |
| 12                                               | or/1-11                                                                                                                                                                                     | 301995  | Advanced |
| 13                                               | "gender and sex"/                                                                                                                                                                           | 1014    | Advanced |

|    |                                                                                    |        |          |
|----|------------------------------------------------------------------------------------|--------|----------|
| 14 | gender identity/                                                                   | 16045  | Advanced |
| 15 | (sex adj2 (differenc* or charact*)).tw,kw.                                         | 57141  | Advanced |
| 16 | sex-related.tw,kw.                                                                 | 7545   | Advanced |
| 17 | sex-based.tw,kw.                                                                   | 1940   | Advanced |
| 18 | (sexes adj2 (differenc* or charact*)).tw,kw.                                       | 2425   | Advanced |
| 19 | (gender adj2 (differenc* or charact*)).tw,kw.                                      | 57828  | Advanced |
| 20 | gender-related.tw,kw.                                                              | 6440   | Advanced |
| 21 | gender-based.tw,kw.                                                                | 3879   | Advanced |
| 22 | (male? or men or man or masculin*).ti,kw.                                          | 307752 | Advanced |
| 23 | (female? or women or woman or feminin*).ti,kw.                                     | 452386 | Advanced |
| 24 | sex.ti,kw.                                                                         | 118101 | Advanced |
| 25 | sexes.ti,kw.                                                                       | 1370   | Advanced |
| 26 | gender*.ti,kw.                                                                     | 74437  | Advanced |
| 27 | or/13-26                                                                           | 926480 | Advanced |
| 28 | 12 and 27                                                                          | 4734   | Advanced |
| 29 | 28 not ((exp animals/ or exp animal experimentation/ or nonhuman/) not exp human/) | 3822   | Advanced |
| 30 | limit 29 to english language                                                       | 3530   | Advanced |
| 31 | case study/                                                                        | 64526  | Advanced |
| 32 | 30 not 31                                                                          | 3505   | Advanced |
| 33 | limit 32 to medline                                                                | 410    | Advanced |
| 34 | 32 not 33                                                                          | 3095   | Advanced |

### PsycINFO <1806 to September Week 2 2019>

| Search history sorted by search number ascending |                                                                                                                                                                               |         |          |
|--------------------------------------------------|-------------------------------------------------------------------------------------------------------------------------------------------------------------------------------|---------|----------|
| #                                                | Searches                                                                                                                                                                      | Results | Type     |
| 1                                                | exp traumatic brain injury/                                                                                                                                                   | 18584   | Advanced |
| 2                                                | head injuries/                                                                                                                                                                | 4419    | Advanced |
| 3                                                | tbi*2.tw.                                                                                                                                                                     | 10530   | Advanced |
| 4                                                | mtbi*2.tw.                                                                                                                                                                    | 1775    | Advanced |
| 5                                                | wrTBI*2.tw.                                                                                                                                                                   | 8       | Advanced |
| 6                                                | concuss*.tw.                                                                                                                                                                  | 3207    | Advanced |
| 7                                                | postconcuss*.tw.                                                                                                                                                              | 840     | Advanced |
| 8                                                | ((head* or cerebr* or crani* or skull* or intracran*) adj2 (injur* or trauma* or damag* or wound* or swell* or oedema* or edema* or fracture* or contusion* or pressur*)).tw. | 12246   | Advanced |

|    |                                                                                                                                                                                          |        |          |
|----|------------------------------------------------------------------------------------------------------------------------------------------------------------------------------------------|--------|----------|
| 9  | ((brain* or cerebr* or intracerebr* or crani* or intracran* or head* or subdural* or epidural* or extradural*) adj (haematoma* or hematoma* or hemorrhag* or haemorrhag* or bleed*)).tw. | 3424   | Advanced |
| 10 | or/1-9                                                                                                                                                                                   | 32573  | Advanced |
| 11 | human sex differences/                                                                                                                                                                   | 109676 | Advanced |
| 12 | exp gender identity/                                                                                                                                                                     | 36117  | Advanced |
| 13 | (sex adj2 (differenc* or charact*)).tw.                                                                                                                                                  | 36634  | Advanced |
| 14 | sex-related.tw.                                                                                                                                                                          | 2076   | Advanced |
| 15 | sex-based.tw.                                                                                                                                                                            | 525    | Advanced |
| 16 | (sexes adj2 (differenc* or charact*)).tw.                                                                                                                                                | 450    | Advanced |
| 17 | (gender adj2 (differenc* or charact*)).tw.                                                                                                                                               | 48456  | Advanced |
| 18 | gender-related.tw.                                                                                                                                                                       | 3025   | Advanced |
| 19 | gender-based.tw.                                                                                                                                                                         | 2845   | Advanced |
| 20 | (male? or men or man or masculin*).ti.                                                                                                                                                   | 80102  | Advanced |
| 21 | (female? or women or woman or feminin*).ti.                                                                                                                                              | 114299 | Advanced |
| 22 | sex.ti.                                                                                                                                                                                  | 46916  | Advanced |
| 23 | sexes.ti.                                                                                                                                                                                | 514    | Advanced |
| 24 | gender*.ti.                                                                                                                                                                              | 50778  | Advanced |
| 25 | or/11-24                                                                                                                                                                                 | 347022 | Advanced |
| 26 | 10 and 25                                                                                                                                                                                | 719    | Advanced |
| 27 | limit 26 to ("0200 book" or "0240 authored book" or "0280 edited book" or "0300 encyclopedia")                                                                                           | 38     | Advanced |
| 28 | exp case report/                                                                                                                                                                         | 22922  | Advanced |
| 29 | 26 not (27 or 28)                                                                                                                                                                        | 675    | Advanced |
| 30 | limit 29 to english language                                                                                                                                                             | 643    | Advanced |

### CINAHL Search Strategy

| #   | Query             | Limiters/Expanders               | Last Run Via                                                                                                       | Results |
|-----|-------------------|----------------------------------|--------------------------------------------------------------------------------------------------------------------|---------|
| S28 | S23 NOT S27       | Search modes -<br>Boolean/Phrase | Interface - EBSCOhost Research<br>Databases<br>Search Screen - Advanced Search<br>Database - CINAHL with Full Text | 850     |
| S27 | S24 OR S25 OR S26 | Search modes -<br>Boolean/Phrase | Interface - EBSCOhost Research<br>Databases                                                                        | 384,980 |

|     |                                                                    |                                                              |                                                                                                              |         |
|-----|--------------------------------------------------------------------|--------------------------------------------------------------|--------------------------------------------------------------------------------------------------------------|---------|
|     |                                                                    |                                                              | Search Screen - Advanced Search Database - CINAHL with Full Text                                             |         |
| S26 | (MH "Case Studies")                                                | Search modes - Boolean/Phrase                                | Interface - EBSCOhost Research Databases<br>Search Screen - Advanced Search Database - CINAHL with Full Text | 22,013  |
| S25 | TI((case n1 (study or report))                                     | Search modes - Boolean/Phrase                                | Interface - EBSCOhost Research Databases<br>Search Screen - Advanced Search Database - CINAHL with Full Text | 70,060  |
| S24 | PT case study                                                      | Search modes - Boolean/Phrase                                | Interface - EBSCOhost Research Databases<br>Search Screen - Advanced Search Database - CINAHL with Full Text | 341,976 |
| S23 | S11 AND S22                                                        | Limiters - English Language<br>Search modes - Boolean/Phrase | Interface - EBSCOhost Research Databases<br>Search Screen - Advanced Search Database - CINAHL with Full Text | 1,017   |
| S22 | S12 OR S13 OR S14 OR S15 OR S16 OR S17 OR S18 OR S19 OR S20 OR S21 | Search modes - Boolean/Phrase                                | Interface - EBSCOhost Research Databases<br>Search Screen - Advanced Search Database - CINAHL with Full Text | 237,092 |
| S21 | TI sex or sexes or gender*                                         | Search modes - Boolean/Phrase                                | Interface - EBSCOhost Research Databases<br>Search Screen - Advanced Search Database - CINAHL with Full Text | 44,146  |
| S20 | TI (female# or women or woman or feminin*)                         | Search modes - Boolean/Phrase                                | Interface - EBSCOhost Research Databases<br>Search Screen - Advanced Search Database - CINAHL with Full Text | 137,449 |
| S19 | TI (male# or men or man or masculin*)                              | Search modes - Boolean/Phrase                                | Interface - EBSCOhost Research Databases<br>Search Screen - Advanced Search Database - CINAHL with Full Text | 60,168  |
| S18 | gender-related                                                     | Search modes - Boolean/Phrase                                | Interface - EBSCOhost Research Databases                                                                     | 1,174   |



|     |                                                                                                                                                                                     |                               |                                                                                                              |        |
|-----|-------------------------------------------------------------------------------------------------------------------------------------------------------------------------------------|-------------------------------|--------------------------------------------------------------------------------------------------------------|--------|
|     |                                                                                                                                                                                     |                               | Search Screen - Advanced Search Database - CINAHL with Full Text                                             |        |
| S17 | (gender n2 (differenc* or charact*))                                                                                                                                                | Search modes - Boolean/Phrase | Interface - EBSCOhost Research Databases<br>Search Screen - Advanced Search Database - CINAHL with Full Text | 16,110 |
| S16 | (sexes n2 (differenc* or charact*))                                                                                                                                                 | Search modes - Boolean/Phrase | Interface - EBSCOhost Research Databases<br>Search Screen - Advanced Search Database - CINAHL with Full Text | 9,942  |
| S15 | sex-based                                                                                                                                                                           | Search modes - Boolean/Phrase | Interface - EBSCOhost Research Databases<br>Search Screen - Advanced Search Database - CINAHL with Full Text | 463    |
| S14 | sex-related                                                                                                                                                                         | Search modes - Boolean/Phrase | Interface - EBSCOhost Research Databases<br>Search Screen - Advanced Search Database - CINAHL with Full Text | 1,073  |
| S13 | (sex n2 (differenc* or charact*))                                                                                                                                                   | Search modes - Boolean/Phrase | Interface - EBSCOhost Research Databases<br>Search Screen - Advanced Search Database - CINAHL with Full Text | 9,942  |
| S12 | (MH "Gender Identity+")                                                                                                                                                             | Search modes - Boolean/Phrase | Interface - EBSCOhost Research Databases<br>Search Screen - Advanced Search Database - CINAHL with Full Text | 6,391  |
| S11 | S1 OR S2 OR S3 OR S4 OR S5 OR S6 OR S7 OR S8 OR S9 OR S10                                                                                                                           | Search modes - Boolean/Phrase | Interface - EBSCOhost Research Databases<br>Search Screen - Advanced Search Database - CINAHL with Full Text | 59,447 |
| S10 | ((brain* or cerebr* or intracerebr* or crani* or intracran* or head* or subdural* or epidural* or extradural*) n1 (haematoma* or hematoma* or hemorrhag* or haemorrhag* or bleed*)) | Search modes - Boolean/Phrase | Interface - EBSCOhost Research Databases<br>Search Screen - Advanced Search Database - CINAHL with Full Text | 15,121 |

|    |                                                                                                                                                                         |                               |                                                                                                              |        |
|----|-------------------------------------------------------------------------------------------------------------------------------------------------------------------------|-------------------------------|--------------------------------------------------------------------------------------------------------------|--------|
| S9 | ((head* or cerebr* or crani* or skull* or intracran*) n2 (injur* or trauma* or damag* or wound* or swell* or oedema* or edema* or fracture* or contusion* or pressur*)) | Search modes - Boolean/Phrase | Interface - EBSCOhost Research Databases<br>Search Screen - Advanced Search Database - CINAHL with Full Text | 23,099 |
| S8 | postconcuss*                                                                                                                                                            | Search modes - Boolean/Phrase | Interface - EBSCOhost Research Databases<br>Search Screen - Advanced Search Database - CINAHL with Full Text | 1,033  |
| S7 | concuss*                                                                                                                                                                | Search modes - Boolean/Phrase | Interface - EBSCOhost Research Databases<br>Search Screen - Advanced Search Database - CINAHL with Full Text | 5,207  |
| S6 | wrTBI##                                                                                                                                                                 | Search modes - Boolean/Phrase | Interface - EBSCOhost Research Databases<br>Search Screen - Advanced Search Database - CINAHL with Full Text | 8      |
| S5 | mTBI##                                                                                                                                                                  | Search modes - Boolean/Phrase | Interface - EBSCOhost Research Databases<br>Search Screen - Advanced Search Database - CINAHL with Full Text | 934    |
| S4 | TBI##                                                                                                                                                                   | Search modes - Boolean/Phrase | Interface - EBSCOhost Research Databases<br>Search Screen - Advanced Search Database - CINAHL with Full Text | 7,526  |
| S3 | (MH "Head Injuries")                                                                                                                                                    | Search modes - Boolean/Phrase | Interface - EBSCOhost Research Databases<br>Search Screen - Advanced Search Database - CINAHL with Full Text | 6,522  |
| S2 | (MH "Brain Concussion+")                                                                                                                                                | Search modes - Boolean/Phrase | Interface - EBSCOhost Research Databases<br>Search Screen - Advanced Search Database - CINAHL with Full Text | 4,350  |
| S1 | (MH "Brain Injuries+")                                                                                                                                                  | Search modes - Boolean/Phrase | Interface - EBSCOhost Research Databases<br>Search Screen - Advanced Search Database - CINAHL with Full Text | 26,008 |

## Web of Science Search Strategy

| Set  | Results                          | Search Strategy                                                                                                                                                                                         |
|------|----------------------------------|---------------------------------------------------------------------------------------------------------------------------------------------------------------------------------------------------------|
| # 17 | <a href="#"><u>2,446</u></a>     | #15 AND #4<br><b>Refined by: LANGUAGES:</b> ( ENGLISH )<br><i>Indexes=SCI-EXPANDED, SSCI, A&amp;HCI, CPCI-S, CPCI-SSH, BKCI-S, BKCI-SSH, ESCI Timespan=All years</i>                                    |
| # 16 | <a href="#"><u>2,524</u></a>     | #15 AND #4<br><i>Indexes=SCI-EXPANDED, SSCI, A&amp;HCI, CPCI-S, CPCI-SSH, BKCI-S, BKCI-SSH, ESCI Timespan=All years</i>                                                                                 |
| # 15 | <a href="#"><u>1,366,275</u></a> | #14 OR #13 OR #12 OR #11 OR #10 OR #9 OR #8 OR #7 OR #6 OR #5<br><i>Indexes=SCI-EXPANDED, SSCI, A&amp;HCI, CPCI-S, CPCI-SSH, BKCI-S, BKCI-SSH, ESCI Timespan=All years</i>                              |
| # 14 | <a href="#"><u>160,852</u></a>   | TI=((sex or sexes))<br><i>Indexes=SCI-EXPANDED, SSCI, A&amp;HCI, CPCI-S, CPCI-SSH, BKCI-S, BKCI-SSH, ESCI Timespan=All years</i>                                                                        |
| # 13 | <a href="#"><u>656,247</u></a>   | TI=((female* OR women OR woman OR feminin*))<br><i>Indexes=SCI-EXPANDED, SSCI, A&amp;HCI, CPCI-S, CPCI-SSH, BKCI-S, BKCI-SSH, ESCI Timespan=All years</i>                                               |
| # 12 | <a href="#"><u>509,179</u></a>   | TI=((male* OR men OR man OR masculin*))<br><i>Indexes=SCI-EXPANDED, SSCI, A&amp;HCI, CPCI-S, CPCI-SSH, BKCI-S, BKCI-SSH, ESCI Timespan=All years</i>                                                    |
| # 11 | <a href="#"><u>6,390</u></a>     | <b>TOPIC:</b> ((gender-based))<br><i>Indexes=SCI-EXPANDED, SSCI, A&amp;HCI, CPCI-S, CPCI-SSH, BKCI-S, BKCI-SSH, ESCI Timespan=All years</i>                                                             |
| # 10 | <a href="#"><u>7,232</u></a>     | <b>TOPIC:</b> ((gender-related))<br><i>Indexes=SCI-EXPANDED, SSCI, A&amp;HCI, CPCI-S, CPCI-SSH, BKCI-S, BKCI-SSH, ESCI Timespan=All years</i>                                                           |
| # 9  | <a href="#"><u>104,127</u></a>   | <b>TOPIC:</b> ((gender NEAR/2 (differenc* OR charact*)))<br><i>Indexes=SCI-EXPANDED, SSCI, A&amp;HCI, CPCI-S, CPCI-SSH, BKCI-S, BKCI-SSH, ESCI Timespan=All years</i>                                   |
| # 8  | <a href="#"><u>90,428</u></a>    | <b>TOPIC:</b> ((sexes NEAR/2 (differenc* OR charact*)))<br><i>Indexes=SCI-EXPANDED, SSCI, A&amp;HCI, CPCI-S, CPCI-SSH, BKCI-S, BKCI-SSH, ESCI Timespan=All years</i>                                    |
| # 7  | <a href="#"><u>2,175</u></a>     | <b>TOPIC:</b> ((sex-based))<br><i>Indexes=SCI-EXPANDED, SSCI, A&amp;HCI, CPCI-S, CPCI-SSH, BKCI-S, BKCI-SSH, ESCI Timespan=All years</i>                                                                |
| # 6  | <a href="#"><u>7,364</u></a>     | <b>TOPIC:</b> ((sex-related))<br><i>Indexes=SCI-EXPANDED, SSCI, A&amp;HCI, CPCI-S, CPCI-SSH, BKCI-S, BKCI-SSH, ESCI Timespan=All years</i>                                                              |
| # 5  | <a href="#"><u>90,428</u></a>    | <b>TOPIC:</b> ((sex NEAR/2 (differenc* OR charact*)))<br><i>Indexes=SCI-EXPANDED, SSCI, A&amp;HCI, CPCI-S, CPCI-SSH, BKCI-S, BKCI-SSH, ESCI Timespan=All years</i>                                      |
| # 4  | <a href="#"><u>173,882</u></a>   | #3 OR #2 OR #1<br><i>Indexes=SCI-EXPANDED, SSCI, A&amp;HCI, CPCI-S, CPCI-SSH, BKCI-S, BKCI-SSH, ESCI Timespan=All years</i>                                                                             |
| # 3  | <a href="#"><u>54,477</u></a>    | <b>TOPIC:</b> (((brain* or cerebr* or intracerebr* or crani* or intracran* or head* or subdural* or epidural* or extradural*) NEAR/1 (haematoma* or hematoma* or hemorrhag* or haemorrhag* or bleed*))) |

|     |                       |                                                                                                                                                                                                                                                                                                          |
|-----|-----------------------|----------------------------------------------------------------------------------------------------------------------------------------------------------------------------------------------------------------------------------------------------------------------------------------------------------|
|     |                       | <i>Indexes=SCI-EXPANDED, SSCI, A&amp;HCI, CPCI-S, CPCI-SSH, BKCI-S, BKCI-SSH, ESCI Timespan=All years</i>                                                                                                                                                                                                |
| # 2 | <b><u>105,918</u></b> | <b>TOPIC:</b> (((head* or cerebr* or crani* or skull* or intracran*) NEAR/2 (injur* or trauma* or damag* or wound* or swell* or oedema* or edema* or fracture* or contusion* or pressur*)))<br><i>Indexes=SCI-EXPANDED, SSCI, A&amp;HCI, CPCI-S, CPCI-SSH, BKCI-S, BKCI-SSH, ESCI Timespan=All years</i> |
| # 1 | <b><u>32,625</u></b>  | <b>TOPIC:</b> ((tbi* OR mTBI* OR wrTBI* OR concuss OR postconcuss))<br><i>Indexes=SCI-EXPANDED, SSCI, A&amp;HCI, CPCI-S, CPCI-SSH, BKCI-S, BKCI-SSH, ESCI Timespan=All years</i>                                                                                                                         |

**Supplementary Table 2: Excluded studies and reason for study exclusion.**

| <b>Title</b>                                                                                                                                                                                             | <b>Author (Year)</b>   | <b>Reason for exclusion</b>                                   |
|----------------------------------------------------------------------------------------------------------------------------------------------------------------------------------------------------------|------------------------|---------------------------------------------------------------|
| 1. Anxiety Sensitivity Mediates Gender Differences in Post-Concussive Symptoms in a Clinical Sample                                                                                                      | Albanese et al. (2017) | No multivariate analysis performed                            |
| 2. The Impact of Neurobehavioral Impairment on Family Functioning and the Psychological Well-Being of Male Versus Female Caregivers of Relatives With Severe Traumatic Brain Injury: Multigroup Analysis | Anderson et al. (2013) | Age not included in multivariate model                        |
| 3. Exploring variables associated with rehabilitation length of stay in brain injuries patients                                                                                                          | Avesani et al. (2012)  | No multivariate analysis performed                            |
| 4. Disability and health-related quality-of-life 4 years after a severe traumatic brain injury: A structural equation modelling analysis                                                                 | Azouvi et al. (2016)   | No multivariate analysis performed                            |
| 5. Themes within Songs Written by People with Traumatic Brain Injury: Gender Differences                                                                                                                 | Baker et al. (2005)    | Large age range which incorporates adolescent patients        |
| 6. Sex Differences in Depressive Symptoms and Their Correlates After Mild-to-Moderate Traumatic Brain Injury                                                                                             | Bay et al. (2009)      | No multivariate analysis performed                            |
| 7. Sex Differences in Outcome after Mild Traumatic Brain Injury                                                                                                                                          | Bazarian et al. (2010) | Large age range which incorporates adolescent patients        |
| 8. Mothers Report More Child-Rearing Disagreements Following Early Brain Injury Than Do Fathers                                                                                                          | Bendikas et al. (2011) | Pediatric population                                          |
| 9. Gender and age predict outcomes of cognitive, balance and vision testing in a multidisciplinary concussion center                                                                                     | Benedict et al. (2015) | No multivariate analysis performed                            |
| 10. Emergency care of traumatic brain injuries in Pakistan: a multicenter study                                                                                                                          | Bhatti et al. (2015)   | Severity not reported on or included in multivariate analysis |
| 11. Effect of sex and age on traumatic brain injury: a geographical comparative study                                                                                                                    | Biswas et al. (2017)   | No multivariate analysis performed                            |

|                                                                                                                                                                  |                          |                                                                                                               |
|------------------------------------------------------------------------------------------------------------------------------------------------------------------|--------------------------|---------------------------------------------------------------------------------------------------------------|
| 12. Gender differences in a sample of vocational rehabilitation clients with TBI                                                                                 | Bounds et al. (2003)     | Age not included in multivariate analysis                                                                     |
| 13. Clinical Course Score (CCS): A New Clinical Score to Evaluate Efficacy of Neurotrauma Treatment in Traumatic Brain Injury and Subarachnoid Hemorrhage        | Brandner et al. (2014)   | No multivariate analysis performed                                                                            |
| 14. Sex Differences in Emotional Status of Traumatically Brain-Injured Patients                                                                                  | Burton et al. (1988)     | No multivariate analysis performed                                                                            |
| 15. Sex-specific predictors of inpatient rehabilitation outcomes after traumatic brain injury                                                                    | Chan et al. (2016)       | Severity not included in multivariate analysis                                                                |
| 16. Examining the epidemiology of work-related traumatic brain injury through a sex/gender lens: analysis of workers' compensation claims in Victoria, Australia | Chang et al. (2014)      | No multivariate analysis performed                                                                            |
| 17. Trends in traumatic brain injury mortality in China, 2006-2013: A population-based longitudinal study                                                        | Cheng et al. (2017)      | Severity not reported on or included in multivariate analysis                                                 |
| 18. Trajectories of sleep changes during the acute phase of traumatic brain injury: A 7-day actigraphy study                                                     | Chiu et al. (2013)       | Age not included in final hierarchical linear model of 24-hour total sleep time subgroup analysis of mild TBI |
| 19. Does Sexual Dimorphism Influence Outcome of Traumatic Brain Injury Patients? The Answer Is No!                                                               | Coimbra et al. (2003)    | No multivariate analysis performed                                                                            |
| 20. Predictors of Postacute Mortality Following Traumatic Brain Injury in a Seriously Injured Population                                                         | Colantonio et al. (2008) | Sex not reported in multivariate analysis                                                                     |
| 21. Gender differences in self reported long term outcomes following moderate to severe traumatic brain injury                                                   | Colantonio et al. (2010) | No multivariate analysis performed                                                                            |
| 22. Traumatic Brain Injury and Early Life Experiences Among Men and Women in a Prison Population                                                                 | Colantonio et al. (2014) | No multivariate analysis performed                                                                            |
| 23. A Rapid Screen of the Severity of Mild Traumatic Brain Injury                                                                                                | Comerford et al. (2002)  | No multivariate analysis performed                                                                            |
| 24. Sex and Age Differences in Depression and Baseline Sport-Related Concussion Neurocognitive Performance and Symptoms                                          | Covassin et al. (2012)   | Patients did not have a brain injury                                                                          |
| 25. Sex-Based Differences in Perceived Pragmatic Communication Ability of Adults With Traumatic Brain Injury                                                     | Despins et al. (2016)    | No multivariate analysis performed                                                                            |
| 26. Newfound sex differences in axonal structure underlie differential outcomes from in vitro traumatic axonal injury                                            | Dolle et al. (2018)      | In vitro study                                                                                                |
| 27. Olfactory Dysfunction in Patients With Head Trauma                                                                                                           | Doty et al. (1997)       | No multivariate analysis performed                                                                            |

|                                                                                                                                                          |                             |                                                                                                |
|----------------------------------------------------------------------------------------------------------------------------------------------------------|-----------------------------|------------------------------------------------------------------------------------------------|
| 28. Fatigue after traumatic brain injury: Association with neuroendocrine, sleep, depression and other factors                                           | Englander et al. (2010)     | Age not included in multivariate analysis                                                      |
| 29. Sex Differences in White Matter Abnormalities after Mild Traumatic Brain Injury: Localization and Correlation with Outcome                           | Fakhran et al. (2014)       | Large age range which incorporates adolescent patients                                         |
| 30. Prehospital management of traumatic brain injury patients- a gender perspective                                                                      | Falk et al. (2015)          | Selective reporting of data and fail to include detailed results or table for regression model |
| 31. Sex-related differences in patients with severe head injury: greater susceptibility to brain swelling in female patients 50 years of age and younger | Farin et al. (2003)         | No multivariate analysis performed                                                             |
| 32. Co-morbid traumatic brain injury and substance use disorder: Childhood predictors and adult correlates                                               | Felde et al. (2005)         | Severity not included in multivariate analysis                                                 |
| 33. Motor Recover During the Acute Period of Craniocerebral Trauma Using Kinetotherapy                                                                   | Frankeviciute et al. (2008) | No multivariate analysis performed                                                             |
| 34. Health & Economic Burden of Traumatic Brain Injury in the Emergency Department                                                                       | Fu et al. (2016)            | No multivariate analysis performed                                                             |
| 35. Predictors of rapid spontaneous resolution of acute subdural hematoma                                                                                | Fujimoto et al. (2014)      | Age not included in multivariate analysis                                                      |
| 36. American Community Survey: Earnings and employment for persons with traumatic brain injury                                                           | Gamboa et al. (2006)        | No multivariate analysis performed                                                             |
| 37. Variations in admissions to hospital for head injury and assault to the head Part 1: age and gender                                                  | Gilthorpe et al. (1999)     | No multivariate analysis performed                                                             |
| 38. Sexual Functioning and the Effect of Fatigue in Traumatic Brain Injury                                                                               | Goldin et al. (2014)        | Severity not included in multivariate analysis                                                 |
| 39. Traumatic Brain Injury and Suicidal Ideation Among U.S. Operation Enduring Freedom and Operation Iraqi Freedom Veterans                              | Gradus et al. (2015)        | Age and severity not included in multivariate analysis                                         |
| 40. Influence of Sex and Age on Inpatient Rehabilitation Outcomes Among Older Adults With Traumatic Brain Injury                                         | Graham et al. (2010)        | Severity not reported on or included in multivariate analysis                                  |
| 41. Female TBI patients recover better than males                                                                                                        | Groswasser et al. (1998)    | Large age range which incorporates pediatric and adolescent patients                           |
| 42. Interview of women whose husbands had head injury                                                                                                    | Gosling et al. (1999)       | Rearranged marriages: marital relationship after head injury                                   |
| 43. Sex differences in mortality after traumatic brain injury, Colorado 1994–1998                                                                        | Gujral et al. (2006)        | Severity not reported on or included in multivariate analysis                                  |

|                                                                                                                                                                         |                              |                                                                      |
|-------------------------------------------------------------------------------------------------------------------------------------------------------------------------|------------------------------|----------------------------------------------------------------------|
| 44. Rehabilitation Utilization following a Work- Related Traumatic Brain Injury: A Sex-Based Examination of Workers' Compensation Claims in Victoria, Australia         | Guerriero et al. (2016)      | Severity not reported on or included in multivariate analysis        |
| 45. Which factors influence the activity levels of individuals with traumatic brain injury when they are first discharged home from hospital?                           | Hamilton et al. (2015)       | Sex, age, and injury severity not included in final regression model |
| 46. Models of Mortality and Morbidity in Severe Traumatic Brain Injury: An Analysis of a Singapore Neurotrauma Database                                                 | Han et al. (2017)            | Sex not included in multivariate analysis                            |
| 47. Acute predictors for mortality after severe TBI in Spain: Gender differences and clinical data                                                                      | Herrera-Melero et al. (2015) | Sex not included in multivariate analysis                            |
| 48. Quality of Life for Individuals with Traumatic Brain Injury: The Influence of Attachment Security and Partner Support                                               | Hess et al. (2016)           | No multivariate analysis performed                                   |
| 49. Development of Posttraumatic Stress Disorder After Mild Traumatic Brain Injury                                                                                      | Hoffman et al. (2012)        | Sex, age, and injury severity not included in multivariate analysis  |
| 50. Sex Differences in Working Memory after Mild Traumatic Brain Injury: A Functional MR Imaging Study                                                                  | Hsu et al. (2015)            | No multivariate analysis performed                                   |
| 51. Psychiatric Diagnoses and Neurobehavioral Symptom Severity Among OEF/OIF VA Patients with Deployment-Related Traumatic Brain Injury: A Gender Comparison            | Iverson et al. (2011)        | Age not included in multivariate analysis                            |
| 52. Deployment-Related Traumatic Brain Injury Among Operation Enduring Freedom/Operation Iraqi Freedom Veterans: Associations with Mental and Physical Health by Gender | Iverson et al. (2013)        | Severity not reported on or included in multivariate analysis        |
| 53. Mild Traumatic Brain Injury, PTSD, and Psychosocial Functioning Among Male and Female U.S. OEF/OIF Veterans                                                         | Jackson et al. (2016)        | No multivariate analysis performed                                   |
| 54. The influence of sex and pre-traumatic headache on the incidence and severity of headache after head injury                                                         | Jenson et al. (1990)         | No multivariate analysis performed                                   |
| 55. Memories following physical trauma in patients treated in the ICU: Does gender and head injury make a difference?                                                   | Johansson et al. (2008)      | Age not included in multivariate analysis                            |
| 56. Sensation Seeking and Risk Behaviors in Young Adults With and Without a History of Head Injury                                                                      | O'Jile et al. (2004)         | Unclear multivariate analysis-appears severity not included          |
| 57. Wives' coping flexibility, time since husbands' injury and the perceived burden of wives of men with traumatic brain injury                                         | Katz et al. (2005)           | No multivariate analysis performed                                   |
| 58. Gender Differences in Agitation After Traumatic Brain Injury                                                                                                        | Kaydan et al. (2004)         | No multivariate analysis performed                                   |
| 59. Depression in Men and Women One Year Following Traumatic Brain Injury (TBI): A TBI Model Systems Study                                                              | Lavoie et al. (2017)         | No multivariate analysis performed                                   |

|                                                                                                                                                    |                           |                                                                                                                                    |
|----------------------------------------------------------------------------------------------------------------------------------------------------|---------------------------|------------------------------------------------------------------------------------------------------------------------------------|
| 60. Affective symptoms in the chronic stage of<br>61. traumatic brain injury: a study of married couples                                           | Lin et al. (1994)         | No multivariate analysis performed                                                                                                 |
| 62. Public attitudes towards survivors of brain injury                                                                                             | Linden et al. (2010)      | Adolescent population                                                                                                              |
| 63. Gender as a Moderator of Cognitive and Affective Outcome After Traumatic Brain Injury                                                          | Lioffi et al. (2009)      | Severity not included in final multivariate model<br>*Participants were matched based on severity however this match was not exact |
| 64. The Negative Impact of Anemia in Outcome from Traumatic Brain Injury                                                                           | Litofsky et al. (2016)    | Sex not included in multivariate analysis                                                                                          |
| 65. Neuropsychological Performance and Sleep<br>66. Disturbance Following Traumatic Brain Injury                                                   | Mahmood et al. (2004)     | Age not included in multivariate analysis                                                                                          |
| 67. Genetic Variation in the Vesicular Monoamine Transporter: Preliminary associations with Cognitive Outcomes after Severe Traumatic Brain Injury | Markos et al. (2017)      | Sex not included in multivariate analysis                                                                                          |
| 68. Risk factors for chronic subdural haematoma formation do not account for the established male bias                                             | Marshman et al. (2015)    | Not all cases of chronic subdural haematoma formation were the result of a traumatic etiology                                      |
| 69. Mortality in Severe Traumatic Brain Injury: A Multivariate Analysis of 748 Brazilian Patients From Florianopolis City                          | Martins et al. (2009)     | Sex not included in multivariate analysis                                                                                          |
| 70. Sex differences in orbitofrontal connectivity in male and female veterans with TBI                                                             | McGlade et al. (2015)     | No multivariate analysis performed                                                                                                 |
| 71. The Prospective Course of Postconcussion Syndrome: The Role of Mild Traumatic Brain Injury                                                     | Meares et al. (2011)      | Age not included in multivariate analysis                                                                                          |
| 72. Variations in admission to hospital for head injury and assault to the head Part 2: ethnic group                                               | Moles et al. (1999)       | No multivariate analysis performed                                                                                                 |
| 73. Does gender influence cognitive outcome after<br>74. traumatic brain injury?                                                                   | Moore et al. (2010)       | Age not included in multivariate analysis                                                                                          |
| 75. Differences according to Sex in Sociosexuality and Infidelity after Traumatic Brain Injury                                                     | Moreno et al. (2015)      | No multivariate analysis performed                                                                                                 |
| 76. Prognostic Value of Demographic Characteristics in Traumatic Brain Injury: Results from the IMPACT Study                                       | Mushkudiani et al. (2007) | Severity not included in multivariate analysis                                                                                     |
| 77. Inflammation and Outcome in Traumatic Brain Injury: Does Gender Effect on Survival and Prognosis?                                              | Naghbi et al. (2017)      | No multivariate analysis performed                                                                                                 |



|                                                                                                                                                                                        |                           |                                                                              |
|----------------------------------------------------------------------------------------------------------------------------------------------------------------------------------------|---------------------------|------------------------------------------------------------------------------|
| 78. Can early clinical parameters predict post-traumatic pituitary dysfunction in severe traumatic brain injury?                                                                       | Nemes et al. (2016)       | No multivariate analysis performed                                           |
| 79. Head trauma and Parkinson's disease: results from an Italian case-control study                                                                                                    | Nicoletti et al. (2017)   | Severity not reported on or included in multivariate analysis                |
| 80. Is head injury a risk factor for schizophrenia?                                                                                                                                    | Nielson et al. (2002)     | Age not included in multivariate analysis                                    |
| 81. Gender differences in executive functions following traumatic brain injury                                                                                                         | Niemeier et al. (2007)    | Age not included in multivariate analysis                                    |
| 82. Gender Differences in Awareness and Outcomes<br>83. During Acute Traumatic Brain Injury Recovery                                                                                   | Niemeier et al. (2014)    | No multivariate analysis performed                                           |
| 84. Influence of Gender on Occurrence of Chronic Subdural Hematoma; Is It an Effect of Cranial Asymmetry?                                                                              | Oh et al. (2014)          | No multivariate analysis performed                                           |
| 85. Apolipoprotein E polymorphism and gender difference in outcome after severe traumatic brain injury                                                                                 | Ost et al. (2008)         | No multivariate analysis performed                                           |
| 86. Postoperative subdural hygroma and chronic subdural hematoma after unruptured aneurysm surgery: age, sex, and aneurysm location as independent risk factors                        | Park et al. (2016)        | Severity not reported on or included in multivariate analysis                |
| 87. Sleep Quality and Reexperiencing Symptoms of PTSD Are Associated With Current Pain in U.S. OEF/OIF/OND Veterans With and Without mTBIs                                             | Powell et al. (2015)      | Cannot confirm that all participants have experienced a TBI                  |
| 88. A retrospective cohort study of comorbidity trajectories associated with traumatic brain injury in veterans of the Iraq and Afghanistan wars                                       | Pugh et al. (2016)        | No multivariate analysis performed                                           |
| 89. Trajectories of Life Satisfaction in the First 5 Years Following Traumatic Brain Injury                                                                                            | Resch et al. (2009)       | Severity not included in multivariate analysis                               |
| 90. Prevalence and types of sleep disturbances acutely after traumatic brain injury                                                                                                    | Rao et al.                | Analysis did not account for TBI severity and age when reporting association |
| 91. Years of Life Lost Because of Gunshot Injury to the Brain and Spinal Cord                                                                                                          | Richmond et al. (2008)    | No multivariate analysis performed                                           |
| 92. Sexual Behavior After Head Injury in Indian Men and Women                                                                                                                          | Sabhesan et al. (1989)    | No multivariate analysis performed                                           |
| 93. Traumatic Brain Injury and Post-Deployment Binge Drinking among Male and Female Army Active Duty Service Members Returning from Operation Enduring Freedom/Operation Iraqi Freedom | Sayko Adams et al. (2017) | Severity and age not included in multivariate analysis                       |
| 94. Gender- and age-related role changes following brain injury                                                                                                                        | Schmidt et al. (1995)     | No multivariate analysis performed                                           |

|                                                                                                                                                   |                                     |                                                                                                 |
|---------------------------------------------------------------------------------------------------------------------------------------------------|-------------------------------------|-------------------------------------------------------------------------------------------------|
| 95. A Comparison of Adult Outcomes for Males Compared to Females Following Pediatric Traumatic Brain Injury                                       | Scott et al. (2015)                 | No multivariate analysis performed                                                              |
| 96. The Effect of Insurance Status, Race, and Gender on ED Disposition of Persons With Traumatic Brain Injury                                     | Selassie et al. (2004)              | Large age range which incorporates pediatric and adolescent patients                            |
| 97. Sex Differences in Injury Severity and Outcome Measures After Traumatic Brain Injury                                                          | Slewa-Younan et al. (2004)          | No multivariate analysis performed                                                              |
| 98. Do men and women differ in their course following traumatic brain injury? A preliminary prospective investigation of early outcome            | Slewa-Younan et al. (2008)          | No multivariate analysis performed                                                              |
| 99. Predictors of mortality in patients with isolated severe traumatic brain injury                                                               | Strnad et al. (2017)                | Age not included in multivariate analysis                                                       |
| 100. Sex Differences In Symptoms, Disability and Life Satisfaction Three Years After Mild Traumatic Brain Injury: A Population based Cohort Study | Styrke et al. (2013)                | Age not included in multivariate analysis                                                       |
| 101. Gender differences in nonlinear motor performance following concussion                                                                       | Studenka et al. (2017)              | No multivariate analysis performed                                                              |
| 102. Mood Disorders after Traumatic Brain Injury in Adolescents and Young Adults: A Nationwide Population-Based Cohort Study                      | Tsai et al. (2014)                  | Population includes adolescents and adults and severity not reported on or included in analysis |
| 103. Suicidal Ideation Following Traumatic Brain Injury: Prevalence Rates and Correlates in Adults Living in the Community                        | Tsaousides et al. (2011)            | No multivariate analysis performed                                                              |
| 104. The Association Between Skull Bone Fractures and Outcomes in Patients With Severe Traumatic Brain Injury                                     | Tseng et al. (2011)                 | Sex not included in multivariate analysis                                                       |
| 105. Risk Factors for Chronic Subdural Hematoma after a Minor Head Injury in the Elderly: A Population-Based Study                                | Tseng et al. (2014)                 | Unclear if head injury was a result of trauma or other causes                                   |
| 106. Fatigue and its relationship with physical activity in adolescents and young adults with traumatic brain injury: a cross-sectional study     | van Markus-Doornbosch et al. (2017) | Adolescent and adult population not separated with respect to analysis                          |
| 107. Gender associations with cerebrospinal fluid glutamate and lactate/ pyruvate levels after severe traumatic brain injury                      | Wagner et al. (2005)                | Age not included in multivariate analysis                                                       |
| 108. Acute Serum Hormone Levels: Characterization and Prognosis after Severe Traumatic Brain Injury                                               | Wagner et al. (2011)                | No multivariate analysis performed                                                              |
| 109. The association between BDNF Val66Met polymorphism and emotional symptoms after mild traumatic brain injury                                  | Wang et al. (2018)                  | Age not included in multivariate analysis                                                       |

|      |                                                                                                                                                             |                     |                                                               |
|------|-------------------------------------------------------------------------------------------------------------------------------------------------------------|---------------------|---------------------------------------------------------------|
| 110. | Factors predictive of outcome in posttraumatic seizures                                                                                                     | Wang et al. (2008)  | Included all ages, cannot differentiate adults                |
| 111. | Traumatic Brain Injury, PTSD, and Current Suicidal Ideation Among Iraq and Afghanistan U.S. Veterans                                                        | Wisco et al. (2014) | Severity not reported on or included in multivariate analysis |
| 112. | Risk factors indicating the need for cranial CT scans in elderly patients with head trauma: an Austrian trial and comparison with the Canadian CT Head Rule | Wolf et al. (2014)  | Sex not included in final multivariate model                  |
| 113. | Factors associated with return to work in men and women with work-related traumatic brain injury                                                            | Xiong et al. (2016) | No multivariate analysis performed                            |
| 114. | A retrospective analysis of postoperative recurrence of septated chronic subdural haematoma: endoscopic surgery versus burr hole craniotomy                 | Yan et al. (2017)   | No multivariate analysis performed                            |
| 115. | Protection From Traumatic Brain Injury in Hormonally Active Women vs Men of a Similar Age                                                                   | Yeung et al. (2011) | Age not included in multivariate analysis                     |
| 116. | Functional outcome after head injury: Comparison of 12–45 year old male and female hormonally active patients                                               | Yu et al. (2012)    | Age and sex not reported in multivariate analysis             |
| 117. | Risk factors for intracranial injury diagnosed by cranial CT in emergency department patients with mTBI                                                     | Zhang et al. (2017) | Sex not included in final multivariate model                  |

**Supplementary Table 3 (a) Quality assessment of observational studies.**

| Study                        | 1   | 2   | 3   | 4   | 5   | 6   | 7   | 8   | 9   | 10  | 11  | 12 | 13  | 14  | Score |
|------------------------------|-----|-----|-----|-----|-----|-----|-----|-----|-----|-----|-----|----|-----|-----|-------|
| Albrecht et al. (2017)       | Yes | Yes | Yes | Yes | Yes | No  | No  | Yes | Yes | No  | Yes | CD | Yes | Yes | +     |
| Arellano-Orden et al. (2011) | Yes | Yes | Yes | Yes | No  | No  | No  | US  | Yes | Yes | Yes | CD | Yes | US  | +     |
| Berry et al. (2009)          | Yes | Yes | Yes | Yes | No  | No  | No  | Yes | Yes | No  | Yes | CD | Yes | Yes | +     |
| Boutin et al. (2017)         | Yes | Yes | Yes | Yes | Yes | No  | No  | Yes | Yes | No  | Yes | CD | Yes | Yes | +     |
| Brown et al. (2012)          | Yes | Yes | Yes | Yes | No  | No  | No  | No  | Yes | No  | Yes | CD | Yes | Yes | +     |
| Clond et al. (2011)          | Yes | Yes | Yes | Yes | No  | No  | No  | Yes | Yes | No  | Yes | CD | Yes | Yes | +     |
| Corrigan et al. (2007)       | Yes | Yes | Yes | Yes | No  | Yes | Yes | Yes | Yes | Yes | Yes | CD | Yes | Yes | +     |
| Cote et al. (2013)           | Yes | Yes | Yes | Yes | No  | No  | No  | Yes | Yes | No  | Yes | CD | Yes | Yes | +     |
| Dahdah et al. (2016)         | Yes | Yes | Yes | Yes | Yes | Yes | Yes | US  | Yes | Yes | Yes | CD | Yes | Yes | +     |
| Davis et al. (2006)          | Yes | Yes | Yes | Yes | No  | No  | No  | Yes | Yes | No  | Yes | CD | Yes | Yes | +     |
| Eramudugolla et al. (2014)   | Yes | Yes | Yes | Yes | No  | Yes | Yes | Yes | Yes | Yes | Yes | CD | Yes | Yes | +     |
| Forslund et al. (2017)       | Yes | Yes | Yes | Yes | No  | Yes | Yes | Yes | Yes | Yes | Yes | CD | Yes | Yes | +     |
| Fortuna et al. (2008)        | Yes | Yes | Yes | Yes | No  | No  | No  | Yes | Yes | No  | Yes | CD | Yes | Yes | +     |
| Gerhart et al. (2002)        | Yes | Yes | Yes | Yes | Yes | Yes | No  | Yes | Yes | No  | Yes | CD | Yes | Yes | +     |
| Glenn et al. (2001)          | Yes | Yes | Yes | Yes | No  | No  | No  | Yes | Yes | No  | Yes | CD | Yes | Yes | +     |
| Hoffman et al. (2012)        | Yes | Yes | Yes | Yes | No  | No  | No  | Yes | Yes | No  | Yes | CD | Yes | Yes | +     |
| Jung et al. (2014)           | Yes | Yes | Yes | Yes | No  | No  | No  | Yes | Yes | No  | Yes | CD | Yes | Yes | +     |
| Kirkness et al. (2004)       | Yes | Yes | CD  | Yes | No  | Yes | Yes | Yes | Yes | No  | Yes | CD | Yes | Yes | +     |
| Kisat et al. (2012)          | Yes | Yes | Yes | Yes | No  | No  | No  | Yes | Yes | No  | Yes | CD | Yes | Yes | +     |
| Lee et al. (2014)            | Yes | Yes | Yes | Yes | No  | Yes | Yes | US  | Yes | No  | Yes | CD | Yes | Yes | +     |
| Leitgeb et al. (2011)        | Yes | Yes | Yes | Yes | Yes | Yes | Yes | Yes | Yes | No  | Yes | CD | Yes | Yes | +     |
| Li et al. (2018)             | Yes | Yes | Yes | Yes | No  | No  | No  | Yes | Yes | No  | Yes | CD | Yes | Yes | +     |
| Meares et al. (2008)         | Yes | Yes | Yes | Yes | No  | Yes | Yes | Yes | Yes | No  | Yes | CD | Yes | Yes | +     |
| Mellick et al. (2002)        | Yes | Yes | Yes | Yes | Yes | Yes | Yes | Yes | Yes | No  | Yes | CD | Yes | Yes | +     |
| Miles et al. (2015)          | Yes | Yes | Yes | Yes | No  | No  | No  | Yes | Yes | No  | Yes | CD | Yes | Yes | +     |
| Mollayeva et al. (2015)      | Yes | Yes | Yes | Yes | No  | No  | No  | Yes | Yes | No  | Yes | CD | Yes | Yes | +     |

|                            |     |     |     |     |     |     |     |     |     |     |     |     |     |     |   |
|----------------------------|-----|-----|-----|-----|-----|-----|-----|-----|-----|-----|-----|-----|-----|-----|---|
| Mollayeva et al. (2016a)   | Yes | Yes | Yes | Yes | Yes | No  | No  | Yes | Yes | No  | Yes | CD  | Yes | Yes | + |
| Mollayeva et al. (2016b)   | Yes | Yes | Yes | Yes | Yes | No  | No  | Yes | Yes | No  | Yes | CD  | Yes | Yes | + |
| Mollayeva et al. (2017a)   | Yes | Yes | Yes | Yes | No  | No  | No  | Yes | Yes | No  | Yes | CD  | Yes | Yes | + |
| Mollayeva et al. (2017b)   | Yes | Yes | Yes | Yes | Yes | No  | No  | Yes | Yes | Yes | Yes | CD  | Yes | Yes | + |
| Mollayeva et al. (2019)    | Yes | Yes | Yes | Yes | Yes | Yes | Yes | Yes | Yes | No  | Yes | CD  | N/A | Yes | + |
| Myrga et al. (2016)        | Yes | Yes | Yes | Yes | No  | Yes | Yes | Yes | Yes | Yes | Yes | Yes | Yes | Yes | + |
| Ng et al. (2006)           | Yes | Yes | Yes | Yes | No  | Yes | Yes | Yes | Yes | No  | Yes | CD  | Yes | Yes | + |
| Ostberg et al. (2014)      | Yes | Yes | Yes | Yes | Yes | No  | No  | Yes | Yes | No  | Yes | CD  | Yes | Yes | + |
| Ottochian et al. (2009)    | Yes | Yes | Yes | Yes | No  | No  | No  | Yes | Yes | No  | Yes | CD  | Yes | Yes | + |
| Ponsford et al. (2008)     | Yes | Yes | Yes | Yes | CD  | Yes | Yes | Yes | CD  | Yes | Yes | No  | Yes | Yes | + |
| Pogoda et al. (2012)       | Yes | Yes | Yes | Yes | No  | No  | No  | Yes | Yes | No  | Yes | CD  | Yes | Yes | + |
| Rao et al. (2008)          | Yes | Yes | Yes | Yes | No  | Yes | Yes | Yes | Yes | No  | Yes | CD  | Yes | Yes | + |
| Renner et al. (2012)       | Yes | Yes | Yes | Yes | No  | Yes | Yes | Yes | Yes | No  | Yes | CD  | Yes | Yes | + |
| Rush et al. (2016)         | Yes | Yes | Yes | Yes | Yes | No  | No  | Yes | Yes | No  | Yes | CD  | Yes | Yes | + |
| Saban et al. (2011)        | Yes | Yes | Yes | Yes | No  | No  | No  | No  | Yes | No  | Yes | CD  | Yes | Yes | + |
| Selassie et al. (2014)     | Yes | Yes | Yes | Yes | No  | No  | No  | Yes | Yes | No  | Yes | CD  | Yes | Yes | + |
| Shonberger et al. (2009)   | Yes | Yes | Yes | Yes | No  | No  | No  | Yes | Yes | No  | Yes | CD  | Yes | Yes | + |
| Sutton et al. (2019)       | Yes | Yes | Yes | Yes | No  | N/A | Yes | Yes | Yes | No  | Yes | CD  | N/A | Yes | + |
| Takada et al. (2016)       | Yes | Yes | Yes | Yes | No  | N/A | Yes | Yes | Yes | No  | Yes | No  | N/A | Yes | + |
| Tawil et al. (2008)        | Yes | Yes | Yes | Yes | No  | No  | No  | Yes | Yes | No  | Yes | Yes | Yes | Yes | + |
| Tsushima et al. (2009)     | Yes | Yes | Yes | Yes | CD  | No  | No  | Yes | Yes | No  | Yes | CD  | Yes | Yes | + |
| van der Horn et al. (2013) | Yes | Yes | Yes | Yes | No  | No  | No  | Yes | Yes | No  | Yes | CD  | Yes | Yes | + |
| Vikane et al. (2016)       | Yes | Yes | Yes | Yes | No  | Yes | Yes | Yes | Yes | No  | Yes | CD  | Yes | Yes | + |
| Wagner et al. (2004)       | Yes | Yes | Yes | Yes | No  | No  | No  | Yes | Yes | Yes | Yes | Yes | Yes | Yes | + |
| Wagner et al. (2007)       | Yes | Yes | Yes | Yes | No  | Yes | Yes | Yes | Yes | Yes | Yes | CD  | Yes | Yes | + |

|                          |     |     |     |     |    |     |     |     |     |    |     |    |     |     |   |
|--------------------------|-----|-----|-----|-----|----|-----|-----|-----|-----|----|-----|----|-----|-----|---|
| Wang et al. (2008)       | Yes | Yes | Yes | Yes | No | No  | No  | Yes | Yes | No | Yes | CD | Yes | Yes | + |
| Wang et al. (2018)       | Yes | Yes | Yes | Yes | No | No  | No  | No  | Yes | No | Yes | CD | Yes | Yes | + |
| Williamson et al. (2016) | Yes | Yes | Yes | Yes | No | Yes | Yes | Yes | Yes | No | Yes | CD | Yes | Yes | + |

\* CD, cannot determine; α, has parent study; N/A, not applicable; NR, not reported.

### **Criteria:**

1. Was the research question or objective in this paper clearly stated?
2. Was the study population clearly specified and defined?
3. Was the participation rate of eligible persons at least 50%?
4. Were all the subjects selected or recruited from the same or similar populations (including the same time period)? Were inclusion and exclusion criteria for being in the study prespecified and applied uniformly to all participants?
5. Was a sample size justification, power description, or variance and effect estimates provided?
6. For the analyses in this paper, were the exposure(s) of interest measured prior to the outcome(s) being measured?
7. Was the timeframe sufficient so that one could reasonably expect to see an association between exposure and outcome if it existed?
8. For exposures that can vary in amount or level, did the study examine different levels of the exposure as related to the outcome (e.g., categories of exposure, or exposure measured as continuous variable)?
9. Were the exposure measures (independent variables) clearly defined, valid, reliable, and implemented consistently across all study participants?
10. Was the exposure(s) assessed more than once over time?
11. Were the outcome measures (dependent variables) clearly defined, valid, reliable, and implemented consistently across all study participants?
12. Were the outcome assessors blinded to the exposure status of participants?
13. Was loss to follow-up after baseline 20% or less?
14. Were key potential confounding variables measured and adjusted statistically for their impact on the relationship between exposure(s) and outcome(s)?

### **QUIPS Six Potential Sources of Bias:**

1. Study Design → 1,10, 12
2. Study Participation → 2,34
3. Study Attrition → 13
4. Associated Factors → 9
5. Outcome Measures/ Confounding Account → 11,14
6. Analysis → 5,6,7,8

**Summary of Scoring:** In addition to crude calculation of total number of biases present out of total number of possible, each study quality was summarized qualitatively into three groups: i) “++” when all or most of the quality were fulfilled (i.e. allowing one “CD” or “NR” based six

potential sources of bias (i.e. study participation, design and attrition, associated factors, outcome measurements, confounding variables, and analyses.); ii) “+” when half items of criteria were fulfilled; iii) “-” when less than half of items of criteria were fulfilled.

**Supplementary Table 3 (b) Quality assessment of case-control study.**

| Study                  | 1   | 2   | 3  | 4   | 5   | 6   | 7  | 8  | 9   | 10  | 11 | 12  | Score           |
|------------------------|-----|-----|----|-----|-----|-----|----|----|-----|-----|----|-----|-----------------|
| Harrison et al. (2006) | Yes | Yes | No | Yes | Yes | Yes | NA | CD | Yes | Yes | CD | Yes | <b>8/12 (+)</b> |

\*CD, cannot determine; NA, not applicable; NR, not reported

Criteria:

1. Was the research question or objective in this paper clearly stated and appropriate?
2. Was the study population clearly specified and defined?
3. Did the authors include a sample size justification?
4. Were controls selected or recruited from the same or similar population that gave rise to the cases (including the same timeframe)?
5. Were the definitions, inclusion and exclusion criteria, algorithms or processes used to identify or select cases and controls valid, reliable, and implemented consistently across all study participants?
6. Were the cases clearly defined and differentiated from controls?
7. If less than 100 percent of eligible cases and/or controls were selected for the study, were the cases and/or controls randomly selected from those eligible?
8. Was there use of concurrent controls?
9. Were the investigators able to confirm that the exposure/risk occurred prior to the development of the condition or event that defined a participant as a case?
10. Were the measures of exposure/risk clearly defined, valid, reliable, and implemented consistently (including the same time period) across all study participants?
11. Were the assessors of exposure/risk blinded to the case or control status of participants?
12. Were key potential confounding variables measured and adjusted statistically in the analyses? If matching was used, did the investigators account for matching during study analysis?

**QUIPS Six Potential Sources of Bias:**

7. Study Design→ 1, 4, 6, 8, 9, 11
8. Study Participation→ 2, 5, 7
9. Study Attrition→ N/A
10. Associated Factors→ 10
11. Outcome Measures/ Confounding Account→ 12
12. Analysis→ 3

**Supplementary Table 3 (c) Quality assessment of qualitative studies.**

| Study                  | 1   | 2   | 3   | 4   | 5   | 6          | 7          | 8   | 9   | 10         | Score           |
|------------------------|-----|-----|-----|-----|-----|------------|------------|-----|-----|------------|-----------------|
| Mollayeva et al., 2020 | Yes | Yes | Yes | Yes | Yes | Can't tell | Yes        | Yes | Yes | Can't tell | <b>8/10 (+)</b> |
| Gutman et al. (1996)   | Yes | Yes | Yes | Yes | Yes | Can't tell | Can't tell | Yes | Yes | Can't tell | <b>7/10 (+)</b> |

Yes, Can't tell & No

Criteria:

1. Was there a clear statement of the aims of the research?
2. Is a qualitative methodology appropriate?
3. Was the research design appropriate to address the aims of the research
4. Was the recruitment strategy appropriate to the aims of the research?
5. Was the data collected in a way that addressed the research issue?
6. Has the relationship between researcher and participants been adequately considered?
7. Have ethical issues been taken into consideration?
8. Was the data analysis sufficiently rigorous?
9. Is there a clear statement of findings?
10. How valuable is the research?

**Supplementary Table 4: Summary of study characteristics, including details on study sample, design, methods and results on associative values of sex/gender, age and injury severity variables on clinical and non-clinical outcomes.**



| Author<br>Date<br>Country<br>Gender<br>inequality<br>index (rank).<br>Level of<br>evidence | (1) Objective<br>(2) Design<br>(3) Setting<br>(4) Inclusion/exclusion (IC/EC) criteria                                                                                                                                                                                                                                                                          | (1) Sample size<br>(2) Attrition<br>(3) Age (mean (SD)/ range), yrs<br>(4) Sex (%M)<br>(5) Time since injury (TSI)<br>(6) Injury severity (IS)<br>(7) Assessment time points/ assessed (AT: t <sub>1</sub> , t <sub>2</sub> , etc.), if longitudinal<br>(8) Education                                                                                                                                                                                                             | Statistical method<br>(1) Approach<br>(2) Level of sign.                  | 1) Confounders<br>2) Medications                                    | Results                                                                                                                                                                                                                                                                                                                                                                                                                                                   |                                                                                                                                                                                                                                           |
|--------------------------------------------------------------------------------------------|-----------------------------------------------------------------------------------------------------------------------------------------------------------------------------------------------------------------------------------------------------------------------------------------------------------------------------------------------------------------|-----------------------------------------------------------------------------------------------------------------------------------------------------------------------------------------------------------------------------------------------------------------------------------------------------------------------------------------------------------------------------------------------------------------------------------------------------------------------------------|---------------------------------------------------------------------------|---------------------------------------------------------------------|-----------------------------------------------------------------------------------------------------------------------------------------------------------------------------------------------------------------------------------------------------------------------------------------------------------------------------------------------------------------------------------------------------------------------------------------------------------|-------------------------------------------------------------------------------------------------------------------------------------------------------------------------------------------------------------------------------------------|
|                                                                                            |                                                                                                                                                                                                                                                                                                                                                                 |                                                                                                                                                                                                                                                                                                                                                                                                                                                                                   |                                                                           |                                                                     | (1) Outcome of interest<br>(2) Measurement(s) used<br>(3) Frequencies or scores (M vs F)                                                                                                                                                                                                                                                                                                                                                                  | Sex, Age & IS related                                                                                                                                                                                                                     |
| Arellano-Orden et al. (2011)<br><br>Spain<br><br>0.081 (15)<br><br>Level III               | (1) To assess role of sex as an independent factor in cerebral oxygenation following RBCT<br>(2) Secondary analysis of a prospective study data<br>(3) Level 1 trauma center<br>(4) IC: pts w/ sev TBI, intraparenchymal ICP & PbrO <sub>2</sub> catheter, post-resuscitation, no bleeding, Hb ≤95 g/l, AP >75 mm Hg w/ no or low-dose vasoactive drugs), under | (1) N= 88<br>(2) 0%<br>(3) Age (M;F): 32.8 ± 13.9; 45.5 ± 19.4<br>(4) Sex: 79.5%<br>(5) N.R<br>(6) IS: sev TBI<br>(7) AT:<br>BL: pre-transfusion set (time not specified)<br>t <sub>1</sub> : end of transfusion<br>t <sub>2</sub> : post-transfusion h 1<br>t <sub>3</sub> : post-transfusion h 2<br>t <sub>4</sub> : post-transfusion h 3<br>t <sub>5</sub> : post-transfusion h 4<br>t <sub>6</sub> : post-transfusion h 5<br>t <sub>7</sub> : post-transfusion h 6<br>(8) N.R | (1) Kolmogorov–Smirnov test<br>Student's t test<br>MANOVA<br>(2) P ≤ 0.05 | (1) PbrO <sub>2</sub> , Sex, Age, Weight, CPP, ISS, & Hb<br>(2) N.R | (1) Cerebral Oxygenation<br>(2) LICOX IMC System<br>(3) PbrO <sub>2</sub> Levels following RBCT (M; W):<br>BL: 23.9 ± 9.6; 24.8 ± 9.0<br>t <sub>1</sub> : 26.4 ± 9.1; 29.8 ± 11.3<br>t <sub>2</sub> : 26.4 ± 9.6; 32.1 ± 12.2<br>t <sub>3</sub> : 26.3 ± 9.0; 32.3 ± 13.1<br>t <sub>4</sub> : 27.2 ± 9.8; 32.6 ± 13.1<br>t <sub>5</sub> : 26.2 ± 9.5; 30.8 ± 11.0<br>t <sub>6</sub> : 26.4 ± 9.5; 30.0 ± 10.2<br>t <sub>7</sub> : 26.2 ± 9.5; 29.6 ± 11.8 | Sex & Age related to the ↑ in PbrO <sub>2</sub> suggesting effect of RBCT on<br><br>Cerebral Oxygenation, as measured by PbrO <sub>2</sub> , is ↑ in F > M<br><br>Age inversely related to the PbrO <sub>2</sub> increment in both groups |

|                                                       |                                                                                                                                                                                                                                                                                                                                 |                                                                                                                                                                                                                                                                                                                                                                                                          |                                                                  |                                    |                                                                                                                                                                                               |                                                                                                                                                                                                                                                                                                    |
|-------------------------------------------------------|---------------------------------------------------------------------------------------------------------------------------------------------------------------------------------------------------------------------------------------------------------------------------------------------------------------------------------|----------------------------------------------------------------------------------------------------------------------------------------------------------------------------------------------------------------------------------------------------------------------------------------------------------------------------------------------------------------------------------------------------------|------------------------------------------------------------------|------------------------------------|-----------------------------------------------------------------------------------------------------------------------------------------------------------------------------------------------|----------------------------------------------------------------------------------------------------------------------------------------------------------------------------------------------------------------------------------------------------------------------------------------------------|
|                                                       | ventilation, PaO <sub>2</sub> /FiO <sub>2</sub> ratio>250, &temperature <38°C<br>(5) EC: Unstable pts (frequent changes in PaO <sub>2</sub> , FiO <sub>2</sub> conc, or ventilatory regimen) or surgery w/in few h                                                                                                              |                                                                                                                                                                                                                                                                                                                                                                                                          |                                                                  |                                    |                                                                                                                                                                                               |                                                                                                                                                                                                                                                                                                    |
| Clond et al. (2011)<br>USA<br>0.203 (43)<br>Level III | (1) To explore assoc btwn sex & SBP in trauma pts w/ Pneumonia & Mortality as outcomes<br>(2) Retrospective comparative study<br>(3) Los Angeles County Trauma System Database<br>(4) IC: ≥ 14 y.o, AD btwn 2003-2008<br>(5) EC: <14, dead on arrival, AIS >5, missing data on: age, sex, AIS, ISS< GCS or blood alcohol status | (1) N=3025 TBI pts (24184 non-TBI)<br>(2) N/A<br>(3) Age ( <b>M;F</b> )<br>TBI: 44.8 ±21.6; 40.7±17.3<br>Non-TBI: 38.6±15.9; 40.7±19.33<br>(4) Sex (TBI; non-TBI): 79.9%; 76.7%<br>(5) N.R<br>(6) IS: ISS ( <b>M;F</b> ):<br>TBI: 21.3±11.1; 22.2±11.6<br>Non-TBI: 7.84±7.93; 7.84±8.41<br>AIS head ( <b>M;F</b> ):<br>TBI: 3.76 ±0.79; 3.77±0.80<br>Non-TBI: 0.49±0.82; 0.48±0.80<br>(7) N/A<br>(8) N.R | (1) MRM Student's t test<br>Wilcoxon rank sum test<br>(2) P<0.05 | (1) Age, ISS, GCS & SBP<br>(2) N.R | (1) Pneumonia & Mortality<br>(2) Medical records<br>(3) Frequency of Pneumonia (M; F): 8.1% (197/2418); 7.2% (44/607)<br><br>Frequency of Mortality: (M; F): 10.3% (250/2418); 12.2% (74/607) | In M, Age, ISS≥16, GCS≤8 & SBP≥160 were SS predictors of pneumonia<br><br>In F, ISS≥16, GCS≤8 & SBP≥160 were SS predictors of pneumonia<br><br>In M, Age, ISS≥16, GCS≤8, SBP<90 & SBP≥160 were all SS predictors of mortality<br><br>In F Age, ISS≥16, GCS≤8 & SBP<90 were predictors of mortality |

|                                                                               |                                                                                                                                                                                                                                                                                                                                                                                 |                                                                                                                                                                                                                                                                                                                                                                                                                                                                                                                                |                                                               |                                                                                                                                                                                                                                                                               |                                                                                                                                                                                                                                     |                                                                                                                                                                    |
|-------------------------------------------------------------------------------|---------------------------------------------------------------------------------------------------------------------------------------------------------------------------------------------------------------------------------------------------------------------------------------------------------------------------------------------------------------------------------|--------------------------------------------------------------------------------------------------------------------------------------------------------------------------------------------------------------------------------------------------------------------------------------------------------------------------------------------------------------------------------------------------------------------------------------------------------------------------------------------------------------------------------|---------------------------------------------------------------|-------------------------------------------------------------------------------------------------------------------------------------------------------------------------------------------------------------------------------------------------------------------------------|-------------------------------------------------------------------------------------------------------------------------------------------------------------------------------------------------------------------------------------|--------------------------------------------------------------------------------------------------------------------------------------------------------------------|
| <p>Glenn et al. (2001)</p> <p>USA</p> <p>0.203 (43)</p> <p>Level IV</p>       | <p>(1) To investigate depression and its assoc w/ subject characteristics in outpts w/ TBI</p> <p>(2) Cross-sectional study of non-consecutive pts</p> <p>(3) Outpt clinic</p> <p>(4) IC: <math>\geq 16</math> y.o, RLAS score V or <math>\uparrow</math> at time of study participation, no other sign neurologic diagnoses</p> <p>EC: NR</p>                                  | <p>(1) N= 41</p> <p>(2) N/A</p> <p>(3) <math>43.6 \pm 15.2</math></p> <p>(4) Sex: 66% M</p> <p>(5) TSI (mos): <math>41.4 \pm 58.9</math></p> <p>(6) IS:</p> <p>Mild: 56%</p> <p>Mod: 17%</p> <p>Sev: 27%</p> <p>(7) N/A</p> <p>(8) N.R</p>                                                                                                                                                                                                                                                                                     | <p>(1) ANOVA</p> <p>OR</p> <p>(2) <math>p &lt; .05</math></p> | <p>(1) Age, Gender, Violent etiology, mTBI, Antidepressant &amp; Stimulant use</p> <p>(2) Med Use:</p> <p>Antidepressants: 32%</p> <p>Psychostimulants: 24%</p> <p>Dopaminergic: 27%</p>                                                                                      | <p>(1) Depression</p> <p>(2) BDI-II</p> <p>(3) N.R</p>                                                                                                                                                                              | <p>Gender &amp; mTBI SS associate w outcome</p> <p>Age was NS</p>                                                                                                  |
| <p>Harrison et al. (2006)</p> <p>Sweden</p> <p>0.048 (4)</p> <p>Level III</p> | <p>(1) To investigate assoc btwn previous HI, SCZ &amp; Non-Affective Psychoses</p> <p>(2) Retrospective comparative study (prognostic)</p> <p>(3) Swedish data records</p> <p>(4) IC: NR</p> <p>EC: died, emigrated or Dx of SCZ or other Non-Affective Psychosis <math>&lt; 16</math> y.o, missing values for <math>\geq 1</math> variables, implausible values for birth</p> | <p>(1) N (SCZ; Non-affective psychosis):</p> <p>Cases: 748; 1,526</p> <p>Controls: 14,960; 30,520</p> <p>(2) N/A</p> <p>(3) Age (SCZ; Non-affective psychosis):</p> <p>16-20: 501; 845</p> <p>21-25: 386; 793</p> <p>26+: 87; 171</p> <p>(4) Sex (SCZ; Non-affective psychosis): 67%; 55.4%</p> <p>(5) TSI (SCZ, non-affective psychosis):</p> <p><math>&lt; 3</math> yrs: 20.37%; 24.43%</p> <p>4-6: 27.78%; 14.5%</p> <p>7-9: 7.4%; 15.26%</p> <p>10-13: 14.81%; 11.44%</p> <p>14+: 29.64%; 34.37%</p> <p>(6) IS: Sev HI</p> | <p>(1) D/O al LRM</p> <p>(2) <math>P &lt; 0.05</math></p>     | <p>(1) Sex, Sev head inj, No inj, Yr of birth, Highest parental income, Highest parental education, Highest parental occupation, Area of birth, Family Hx of psychosis, Apgar score at 5min, Gestational age, Paternal age, Birthweight &amp; Birth length</p> <p>(2) N.R</p> | <p>(1) SCZ &amp; Non-Affective Psychosis</p> <p>(2) Medical records</p> <p>(3) Frequency of SCZ (M;F): 67.0% (501/748); 33.0% (247/748)</p> <p>Frequency of Non-Affective Psychosis (M;F): 55.4% (845/ 1526) ; 44.6% (681/1526)</p> | <p>No diff in M &amp; F for SCZ &amp; for other Non-Affective Psychoses</p> <p>Interaction w/sex &amp; Sev HI SS predictors of Non-Affective Psychosis not SCZ</p> |

|                                                                         |                                                                                                                                                                                                                                                                                                                                                                        |                                                                                                                                                                                                                                                                                                |                                                                            |                                                                                                                                                                                                                                                    |                                              |                                                                                                                                                                                                      |
|-------------------------------------------------------------------------|------------------------------------------------------------------------------------------------------------------------------------------------------------------------------------------------------------------------------------------------------------------------------------------------------------------------------------------------------------------------|------------------------------------------------------------------------------------------------------------------------------------------------------------------------------------------------------------------------------------------------------------------------------------------------|----------------------------------------------------------------------------|----------------------------------------------------------------------------------------------------------------------------------------------------------------------------------------------------------------------------------------------------|----------------------------------------------|------------------------------------------------------------------------------------------------------------------------------------------------------------------------------------------------------|
|                                                                         |                                                                                                                                                                                                                                                                                                                                                                        | (7) N/A<br>(8) N.R                                                                                                                                                                                                                                                                             |                                                                            |                                                                                                                                                                                                                                                    |                                              |                                                                                                                                                                                                      |
| Lee et al.<br>(2014)<br><br>Taiwan<br><br>0.164 (37)<br><br>Level II    | (1) To evaluate if TBI pts have a ↑ risk of Stroke compared to general population<br>(2) Retrospective cohort study<br>(3) National Health Insurance program database<br>(4) IC: hospitalized for Stroke & diagnosed w/ mTBI<br>EC: pts w/ mTBI & any type of Stroke diagnosed before January 1, 2007, diagnosed w/ Hemorrhagic Stroke during F/U period, previous TBI | (1) N= 24905 (w/mTBI); 719811 (w/o mTBI control)<br>(2) N/A<br>(3) Age (mTBI; control): 46.1±20.1; 43.5±16.3<br>(4) Sex (mTBI; control):47.4%; 48.5%<br>(5) TSI mTBI; (mean F/U yr): 1.94±1.18<br>(6) IS: mTBI<br>(7) N/A<br>(8) N.R                                                           | (1) Pearson's chi-square t test<br>Cox proportional HR model<br>(2) p<0.05 | (1) Age, Sex, Urbanization level, SES, Diabetes, Hypertension, Coronary Artery Dx, Hyperlipidemia, Hx of alcohol intoxication, Malignancies, Heart Failure, Atrial Fibrillation, Smoking, Obesity, Epilepsy, Peripheral Artery Dx & CCI<br>(2) N.R | (1) Stroke<br>(2) Medical records<br>(3) N.R | HR of Ischemic Stroke:<br>Age: (HR= 1.07; 95% CI =1.06-1.07; P= <0.001)<br>Sex: (HR= 1.46; 95% CI= 1.40-1.52; P= <0.001)<br>Older age, Sex (M) & Severity assoc w/ ↑ risks of Ischemic Stroke in TBI |
| Meares et al. (2007)<br><br>Australia<br><br>0.120 (24)<br><br>Level IV | (1) To examine predictors of acute PCS<br>(2) Case-control study<br>(3) Level 1 trauma hospital<br>(4) IC: hospital AD w/in 24h of inj, initial assessment not > than 14d, btwn 18-65 y.o, IQ >70, not subject of forensic investigation, no                                                                                                                           | (1) N= 90 mTBI; 85 controls<br>(2) N/A<br>(3) Age (mTBI; controls): 34.7±13.7; 34.6±12.1<br>(4) Sex (mTBI; controls): 67.8%; 64.7%<br>(5) TSI: w/in 14d post-inj<br>(6) ISS (mTBI; controls): 5.4±6.2; 5.5±5.3<br>GCS (mTBI):<br>13: 2.2%<br>14: 12.1%<br>15: 85.7%<br>Duration of PTA (mTBI): | (1) LRM<br>(2) P<0.05                                                      | (1) Age, Sex, IQ, mTBI, CLTR, SDMT-oral, SEQRT1, ASDS-DISS, ASDS-total, AXIS-1, SUBS & Pain<br>(2) Med Intake: Opioid Analgesics: 56.7%<br>Marijuana: 25.6%                                                                                        | (1) PCS<br>(2) PCSC & MINI<br>(3) N.R        | Sex (F) was a SS predictors of acute PCS while Age & mTBI were not                                                                                                                                   |

|                                                                  |                                                                                                                                                                                                                                                                                                       |                                                                                                                                                                                                         |                                                                                       |                                                                                                    |                                                                                                                 |                                                                                                                                                            |
|------------------------------------------------------------------|-------------------------------------------------------------------------------------------------------------------------------------------------------------------------------------------------------------------------------------------------------------------------------------------------------|---------------------------------------------------------------------------------------------------------------------------------------------------------------------------------------------------------|---------------------------------------------------------------------------------------|----------------------------------------------------------------------------------------------------|-----------------------------------------------------------------------------------------------------------------|------------------------------------------------------------------------------------------------------------------------------------------------------------|
|                                                                  | evidence of pre-existing cog impairment, sufficient English language comprehension, no Psychosis, no physical inj as a result of self-harm, medically able to participate, not being interstate or overseas visitor, not pregnant<br>EC: trauma related lesion present on CT scan regarded as mod TBI | <5min: 36.7%<br>6-60min: 22.2%<br>61min-12h: 23.3%<br>>12h-24h: 17.8%<br>(7) N/A<br>(8) Education duration in yrs (mTBI; controls): 11.5±2.8; 11.5±2.5                                                  |                                                                                       |                                                                                                    |                                                                                                                 |                                                                                                                                                            |
| Miles et al. (2015)<br><br>USA<br><br>0.203 (43)<br><br>Level IV | (1) To examine impact of mTBI on PTSD symptoms, frequency of AUD & influence of PTSD on AUD in veterans<br>(2) Case series<br>(3) Veteran medical center<br>(4) IC: N.R<br>EC: Veterans who were not given the TBI screen                                                                             | (1) N= 1278<br>(2) N/A<br>(3) Age: 29.75±7.71<br>(4) Sex: 88.7%<br>(5) N.R<br>(6) IS: mTBI<br>(7) N/A<br>(8) Education<br>High School/GED: 32.3%<br>College (1-3yrs): 55.7%<br>Completed College: 12.0% | (1) t test<br>LRM<br>(2) P<0.05                                                       | (1) Age, Sex, Severity & PTSD<br>(2) N.R                                                           | (1) AUD<br>(2) Medical records & clinical interview<br>(3) Frequency of AUD (M; F): 25.9% (97/374); 3.6% (1/28) | In M, PTSD was a SS predictor of AUD;<br>Age, mTBI were NS<br><br>In F, neither mTBI or PTSD were SS predictors for AUD (possibly due to ↓ frequency of F) |
| Mollayeva et al. (2016)<br><br>Canada<br><br>0.098 (18)          | (1) To evaluate the presence of Insomnia in works w/ delayed recovery from TBI and its relationship w/ other factors                                                                                                                                                                                  | (1) N=94<br>(2) N/A<br>(3) Age: 45.20±9.94<br>(4) Sex: 61.7%<br>(5) TSI: 509d (median=197d)<br>(6) IS: mTBI                                                                                             | (1) Spearman's correlation<br>ANOVA<br>Residual plots<br>Stepwise MRM<br>(2) P≤0.10 & | (1) Variables w/in: Sociodemographic, Claim-related, Family-related, Social, Inj-related, Medical, | (1) Insomnia<br>(2) ISI<br>(3) ISI Score (M;F): 17.09 ± 6.40; 17.83 ± 5.68                                      | Age, Previous head trauma were SS predictors of outcome in final model<br>Sex NS                                                                           |

|                                                                         |                                                                                                                                                                                                                                                                            |                                                                                                                                                                                                                                                                                                                                                                                                    |                                                                                                                              |                                                                                                                                                                                                                 |                                                                                                                                                                                                         |                                                                           |
|-------------------------------------------------------------------------|----------------------------------------------------------------------------------------------------------------------------------------------------------------------------------------------------------------------------------------------------------------------------|----------------------------------------------------------------------------------------------------------------------------------------------------------------------------------------------------------------------------------------------------------------------------------------------------------------------------------------------------------------------------------------------------|------------------------------------------------------------------------------------------------------------------------------|-----------------------------------------------------------------------------------------------------------------------------------------------------------------------------------------------------------------|---------------------------------------------------------------------------------------------------------------------------------------------------------------------------------------------------------|---------------------------------------------------------------------------|
| Level IV                                                                | (2) Cross-sectional<br>(3) Worker's Safety & Insurance Board Clinic at Toronto Rehab-UHN<br>(4) IC: ≥18y.o, injured at work<br>EC: N.R                                                                                                                                     | (7) N/A<br>(8) Education:<br>≤High school: 36%<br>High school-college, professional diploma: 34%<br>≥University: 27%                                                                                                                                                                                                                                                                               | P≤0.05 (final model)                                                                                                         | Psychiatric, Comorbid sleep D/Os, Other clinical, Med/Substance effects & Behavioral<br><br>(2) Med Intake:<br>Antihistamines: 26%<br>Benzodiazepines: 14%<br>Narcotic analgesics: 24%<br>TCA: 29%<br>SSRI: 16% |                                                                                                                                                                                                         |                                                                           |
| Mollaveya et al. (2016)<br><br>Canada<br><br>0.098 (18)<br><br>Level IV | (1) To examine the relationship btwn Insomnia & perceived Disability in workers w/ mTBI/Concussion<br>(2) Cross-sectional<br>(3) Worker's Safety & Insurance Board Clinic at Toronto Rehab-UHN<br>(4) IC: ≥18y.o, injured at work, diagnosed w/ mTBI/Concussion<br>EC: N.R | (1) N=92 (58 Marked/Extreme Disability & 34 Mild/Mod Disability)<br>(2) N/A<br>(3) Age (Marked/Extreme; Mild/Mod): 45.60±9.70; 44.40±10.40<br>(4) Sex (Marked/Extreme; Mild/Mod): 65.2%; 52.9%<br>(5) TSI: median 196d (138-412d)<br>(6) IS: mTBI/Concussion<br>(7) N/A<br>(8) Education (Marked/Extreme; Mild/Mod): ≤High school: 36.2%; 38.2% > High school: 62.1%; 58.8%<br>Missing: 1.7%; 2.9% | (1) Two-sided t test<br>Chi-squared tests<br>Spearman's correlation<br>ANOVA<br>Residual plots<br>Stepwise MRM<br>(2) P≤0.05 | (1) Insomnia, Age, Sex, Depression, Pain, Anxiety & Work status<br>(2) N.R                                                                                                                                      | (1) Perceived Disability<br>(2) ISI, PHQ-9, P-VAS, HADS-A<br>(3) Frequency of Global Disability- Marked/Extreme (M;F): 65.2% (38/58); 34.8% (20/58)<br><br>Mild/Mod (M;F): 52.9% (18/34); 46.1% (16/34) | Sex & Age NS associate w/ Global, Work, Social or Family/ Home Disability |

|                                                                             |                                                                                                                                                                                                                                                                                                                                                            |                                                                                                                                                                                                                                                  |                                                                                                               |                                                                                                                                                                                                                                                                                                                                                                                              |                                                                                                                                                                                                                                                                           |                                                                                                                                                                                                                                                                                                                                                  |
|-----------------------------------------------------------------------------|------------------------------------------------------------------------------------------------------------------------------------------------------------------------------------------------------------------------------------------------------------------------------------------------------------------------------------------------------------|--------------------------------------------------------------------------------------------------------------------------------------------------------------------------------------------------------------------------------------------------|---------------------------------------------------------------------------------------------------------------|----------------------------------------------------------------------------------------------------------------------------------------------------------------------------------------------------------------------------------------------------------------------------------------------------------------------------------------------------------------------------------------------|---------------------------------------------------------------------------------------------------------------------------------------------------------------------------------------------------------------------------------------------------------------------------|--------------------------------------------------------------------------------------------------------------------------------------------------------------------------------------------------------------------------------------------------------------------------------------------------------------------------------------------------|
| Mollaveya<br>et al. (2017)<br><br>Canada<br><br>0.098 (18)<br><br>Level IV  | (1) To examine sex<br>diff in construct of<br>chronic pain in pts<br>with delayed<br>recovery from<br>concussion/mTBI<br>(2) Cross-sectional<br>(3) Worker's Safety<br>& Insurance Board<br>Clinic at Toronto<br>Rehab-UHN<br>(4) IC: pts w/<br>concussion/ mTBI<br>Dx<br>EC: w/o brain injury<br>Dx, brain injury due<br>to electrocution,<br>mod-sev TBI | (1) N=94<br>(2) N/A<br>(3) Age: 45.20±9.94<br>(4) Sex: 62%<br>(5) TSI: median 197d (139-<br>416)<br>(6) IS: mTBI<br>(7) N/A<br>(8) Education:<br>≤High school: 36%<br>High school-college,<br>professional diploma,<br>university or higher: 64% | (1) Spearman's<br>correlation<br>ANOVA<br>Residual plots<br>Stepwise MRM<br>(2) P≤0.05                        | (1) Variables w/in:<br>Cultural/Social,<br>Behavioral/Environ<br>mental,<br>Psychological/<br>Pathopsychologicv<br>al, Physiological/<br>Brain inj related &<br>Physical/ Med<br>effect<br><br>(2) Med Intake<br>Antihistamines:<br>26%<br>Benzodiazepines:<br>13%<br>Narcotic<br>analgesics: 22%<br>Tricyclic<br>antidepressants:<br>29%<br>SSRI: 15%<br>Recreational<br>substance use: 12% | (1) Pain Severity<br>(2) P-VAS<br>(3) Pain Severity Score<br>(M;F): 16.33±6.23;<br>15.14±6.62                                                                                                                                                                             | Sex, Age NS<br>associate w pain<br>severity<br><br>Sex-specific<br>multivariate models<br>perform better:<br><br>Fully adj final<br>generic model<br>explained 34.5% of<br>variance of pain<br>severity<br>M-specific fully adj<br>model explained<br>60% of variance of<br>pain<br>F-specific fully adj<br>model explained<br>46.2% of variance |
| Mollaveya<br>et al. (2017)<br><br>Canada<br><br>0.098 (18)<br><br>Level III | (1) To examine<br>deviation in sleep<br>stage distribution in<br>persons w/ mTBI<br>(2) Case-control<br>study<br>(3) Neurology<br>services of Toronto<br>Rehab-UHN<br>(4) IC: mTBI Dx &<br>PSG data                                                                                                                                                        | (1) N= 39<br>(2) N/A<br>(3) Age: 47.54 ± 11.30<br>(4) Sex: 56%<br>(5) TSI: 799 (9008/135)<br>(6) IS: mTBI<br>(7) N/A<br>(8) Education<br>≤ High school: 38%<br>> High school: 62%                                                                | (1)<br>Kolmogorove-<br>Smirnov test<br>Spearman's<br>correlation<br>coefficient<br>ANOVA<br>MRM<br>(2) P≤0.05 | (1) Adjustment<br>D/O, Symptom<br>load, Body mass<br>index, Tension w/<br>employer or<br>insurer, RDI in<br>REM, SSRI use,<br>Insomnia, Cog<br>D/O, Education><br>high school,<br>Mechanism of inj,<br>RDI in non REM,                                                                                                                                                                       | (1) Change in Nocturnal<br>Wakefulness, N1, N2, N3<br>(stage 3&4) & REM in ref<br>to age (per 5-year ↑) & sex<br>specific norms<br>(2) PSG<br>(3) Nocturnal Wakefulness<br>(M & W vs. pop norms):<br>M: 12.69 ± 14.13<br>W: 12.15 ± 9.49<br><br>N2 (M & F vs. pop norms): | Sex NS associate<br>with outcome<br><br>Age & LOC and/or<br>PTA SS for change<br>in N3(stage 3) & N3<br>(stage 4) respectively                                                                                                                                                                                                                   |

|                                                                         |                                                                                                                                                                                                                                                                                                                                                                                      |                                                                                                                                                                                                                                                                                                                                                                                      |                                                                                                                               |                                                                                                                                                                                                                                                           |                                                                                                                             |                                                                                                                                                                                                                                                                                                                                      |
|-------------------------------------------------------------------------|--------------------------------------------------------------------------------------------------------------------------------------------------------------------------------------------------------------------------------------------------------------------------------------------------------------------------------------------------------------------------------------|--------------------------------------------------------------------------------------------------------------------------------------------------------------------------------------------------------------------------------------------------------------------------------------------------------------------------------------------------------------------------------------|-------------------------------------------------------------------------------------------------------------------------------|-----------------------------------------------------------------------------------------------------------------------------------------------------------------------------------------------------------------------------------------------------------|-----------------------------------------------------------------------------------------------------------------------------|--------------------------------------------------------------------------------------------------------------------------------------------------------------------------------------------------------------------------------------------------------------------------------------------------------------------------------------|
|                                                                         | EC: pts w/o brain inj, inj due to electrocution, no evidence of sleep D/O requiring PSG, mod-sev TBI, sleep efficiency during PSG of <30                                                                                                                                                                                                                                             |                                                                                                                                                                                                                                                                                                                                                                                      |                                                                                                                               | Cluster B personality trait, Musculoskeletal D/O, LOC and/or PTA, Wakefulness preceding PSG, Benzodiazepines use & REM periods (2) Med Intake (d preceding PSG): Benzodiazepines: 18% Narcotic analgesics: 28% TCA: 36% SSRIs: 23%                        | M: $-2.97 \pm 14.99$<br>F: $-5.77 \pm 9.27$<br><br>REM (M & F vs. pop norms):<br>M: $-6.38 \pm 5.73$<br>F: $-9.96 \pm 7.45$ |                                                                                                                                                                                                                                                                                                                                      |
| Mollaveya et al. (2019)<br><br>Canada<br><br>0.098 (18)<br><br>Level II | (1) To evaluate whether the risk of incident of dementia was related to severity & extent of CNS trauma differently in M & F<br>(2) Retrospective cohort w multiway sensitivity analyses<br>(3) Institute for Clinical Evaluative Sciences Database<br>(4) IC: Adults $\geq 18$ y.o, Ontario residents, Dx of CNS trauma in an ED or acute care<br>EC: first TBI before Apr 1, 2003, | (1) N= 712,708 (32,834 Dementia; 679,874 No Dementia)<br>(2) N/A<br>(3) Age at first TBI: Total: 44.00 (27.00-64.00) Dementia: 82.00 (76.00-87.00) No Dementia: 42.00 (26.00-63.00)<br>(4) Sex (Total; Dementia; No Dementia): 59.44%; 40.63%; 60.35%<br>(5) N.R<br>(6) IS (n of total pts): Mild: 443,456 Moderate: 7,365 Severe: 17,390 Unspecified: 244,497<br>(7) N/A<br>(8) N.R | (1) Univariate & multivariable Cox regression models<br>HR<br>Fine and Gray competing risk regression model<br>(2) $P < 0.05$ | (1) TBI severity, SCI, sex, age, income, cerebrovascular D/O, ischemic heart D/O, D/O vessels, atrial fibrillation, heart failure, obesity, tobacco smoking, hyperlipidemia, diabetes, depression, vision impairments, hearing loss, sleep D/O<br>(2) N.R | (1) Dementia onset<br>(2) Medical records<br>(3) Frequency of Dementia (M; F): 40.63%; 60.35%                               | Sex/gender associate with dementia RR (male sex at greater risk)<br><br>Age interacted with TBI severity to $\uparrow$ RR (younger pts greater RR)<br><br>Severe TBI and concussive injury $\uparrow$ RR<br><br>Sex-stratified model: female patients develop dementia earlier than male patients all other risk factors being equal |



|                                                                       |                                                                                                                                                                                                                                                                                                                                                  |                                                                                                                                                                                                                                                                      |                                                                |                                                                                                                      |                                                                                                                                                          |                                                                                                                                                                                                            |
|-----------------------------------------------------------------------|--------------------------------------------------------------------------------------------------------------------------------------------------------------------------------------------------------------------------------------------------------------------------------------------------------------------------------------------------|----------------------------------------------------------------------------------------------------------------------------------------------------------------------------------------------------------------------------------------------------------------------|----------------------------------------------------------------|----------------------------------------------------------------------------------------------------------------------|----------------------------------------------------------------------------------------------------------------------------------------------------------|------------------------------------------------------------------------------------------------------------------------------------------------------------------------------------------------------------|
|                                                                       | dementia Dx < 1 yr prior to TBI & <3 yrs post first TBI, pts w/ delirium                                                                                                                                                                                                                                                                         |                                                                                                                                                                                                                                                                      |                                                                |                                                                                                                      |                                                                                                                                                          |                                                                                                                                                                                                            |
| Podoga et al. (2012)<br><br>USA<br><br>0.203 (43)<br><br>Level III    | (1) To identify the co-occurrence of MSI & examine characteristics that were potentially predictive of MSI (sensory, auditory & visual impairments)<br>(2) Case-control study<br>(3) Veteran medical center<br>(4) IC: no brain inj preceding employment or post-deployment, met mTBI Hx based on VA-DOD clinical practice guidelines<br>EC: N.R | (1) N= 13746 (9998 mTBI; 3748 no mTBI)<br>(2) N/A<br>(3) Age (mTBI; no mTBI):<br>18-24: 23.7%; 16.1%<br>25-29: 35.9%; 30.0%<br>30-39: 23.8%; 26.3%<br>≥40: 16.6%; 27.6%<br>(4) Sex (mTBI; no mTBI):<br>95.0%; 91.6%<br>(5) N.R<br>(6) IS: mTBI<br>(7) N/A<br>(8) N.R | (1) Chi-square test<br>Independent t-test<br>LRM<br>(2) P<0.05 | (1) Age, Sex, Branch of service, Rank, Etiology of inj, mTBI Hx, PTSD & Depression<br>(2) N.R                        | (1) MSI<br>(2) Self-report<br>(3) N.R                                                                                                                    | Age, Sex (F) & mTBI Hx SS predictive of MSI (both models)                                                                                                                                                  |
| Sutton et al. (2019)<br><br>Canada<br><br>0.098 (18)<br><br>Level III | (1) To study sex diff in rate of neck inj comorbidity in pts with a concussion<br>(2) Retrospective comparative study<br>(3) National Ambulatory Care Reporting System<br>(4) IC: Pts identified w/ ICD S06.0 code & those                                                                                                                       | (1) N=90,175 (8,134 MVC related)<br>(2) N/A<br>(3) Mean age N.R<br>(4) Sex (All concussions; MVC related): 58.13%; 53.2%<br>(5) N.R<br>(6) IS: mTBI<br>(7) N/A<br>(8) N.R                                                                                            | 1) MLRM<br>2) OR<br>3) P<0.05                                  | 1) Sex, Age, Mechanism of injury, Income, Rurality, Sports injury, Fiscal year of ED, DC, Intention of Inj<br>2) N.R | 1) Comorbid neck injury<br>2) Medical records<br>3) Frequency of comorbid neck inj (M; F):<br>4) All concussions: 58.13%; 41.87%<br>5) MVC: 53.2%; 46.8% | For the All concussions:<br>M group age ranges 15-19, 20-24, 25-29, 30-34, 45-49, 50-54, 55-59, 60-64 & 65-69 were SS<br>F group age ranges 15-19, 20-24, 25-29, 35-39, 40-44, 45-49, 50-54, 55-59, 60-64, |

|                                                                  |                                                                                                                                                                                                                                                                                                                                                 |                                                                                                                                                                            |                                                               |                                                                                            |                                                              |                                                                                                                                                                                             |
|------------------------------------------------------------------|-------------------------------------------------------------------------------------------------------------------------------------------------------------------------------------------------------------------------------------------------------------------------------------------------------------------------------------------------|----------------------------------------------------------------------------------------------------------------------------------------------------------------------------|---------------------------------------------------------------|--------------------------------------------------------------------------------------------|--------------------------------------------------------------|---------------------------------------------------------------------------------------------------------------------------------------------------------------------------------------------|
|                                                                  | w/ mild inj severity (<3 AIS)<br>EC: Superficial inj (S10), open wounds (S11) amputation (S18)                                                                                                                                                                                                                                                  |                                                                                                                                                                            |                                                               |                                                                                            |                                                              | 65- 69 & 70-74 were SS<br><br>For the MVC concussion:<br>M group age ranges 15-19, 20-24 & 30-34 were SS<br><br>F group age ranges 15-19, 20-24, 25-29, 45-49, 50-54, 55-59 & 60-64 were SS |
| Tawil et al. (2007)<br><br>USA<br><br>0.203 (43)<br><br>Level IV | (1) To define the incidence & Mortality impact of PTCI & risk factors assoc w/ PTCI<br>(2) Case series<br>(3) Trauma/critical care center<br>(4) IC: sev TBI, GCS <9, AIS >2, survive beyond 24h<br>EC: pts w/ CT evidence of diffuse cerebral infarction b/c of Hypoperfusion, primary CVA, or Strokes secondary to angiographic complications | (1) N=384 Total (31/ 384= PTCI only)<br>(2) N/A<br>(3) Age (PTCI): 36 (11–90)<br>(4) Sex (All TBI including PTCI): 75%<br>(5) N.R<br>(6) IS: sev TBI<br>(7) N/A<br>(8) N.R | (1) Chi-square test<br>Student's t test<br>LRM<br>(2) P< 0.05 | (1) Sex, Age, ISS, TRISS, RTS, AD GCS, Brain AIS, Craniotomy, BCVI, Factor VIIa<br>(2) N.R | (1) PTCI<br>(2) CT scan, MRI & Cerebral angiogram<br>(3) N.R | Sex, Age, ISS, RTS, AD GCS, & Brain AIS NS associate w PTCI                                                                                                                                 |
| van der Horn et al. (2013)                                       | (1) To investigate the relation of Postconcussive symptoms, Anxiety,                                                                                                                                                                                                                                                                            | (1) N= 242 (51 Minor; 121 Mild; 70 Mod-Sev)<br>(2) N/A                                                                                                                     | (1) Spearman correlation coefficient<br>Chi-square test       | (1) GCS score, Postconcussive symp, Anxiety & Depression                                   | (1) RTW<br>(2) RTW Questionnaire                             | Sex, Age NS<br>IS, Postconcussive symp, Anxiety, & Depression were all                                                                                                                      |

|                                                           |                                                                                                                                                                                                                                                                                                                                                                                                                                                                         |                                                                                                                                                                                                                                                                                                                                                                                                                                                                                              |                                                                                                                                                   |                                                                                                                                                                                                                                                                                                                         |                                                                                                                                                                                                                                                                                                                                                                     |                                                                          |
|-----------------------------------------------------------|-------------------------------------------------------------------------------------------------------------------------------------------------------------------------------------------------------------------------------------------------------------------------------------------------------------------------------------------------------------------------------------------------------------------------------------------------------------------------|----------------------------------------------------------------------------------------------------------------------------------------------------------------------------------------------------------------------------------------------------------------------------------------------------------------------------------------------------------------------------------------------------------------------------------------------------------------------------------------------|---------------------------------------------------------------------------------------------------------------------------------------------------|-------------------------------------------------------------------------------------------------------------------------------------------------------------------------------------------------------------------------------------------------------------------------------------------------------------------------|---------------------------------------------------------------------------------------------------------------------------------------------------------------------------------------------------------------------------------------------------------------------------------------------------------------------------------------------------------------------|--------------------------------------------------------------------------|
| Netherlands<br>0.044 (3)<br>Level IV                      | & Depression w/<br>vocational outcome<br>in pts w/ TBI<br>(2) Case series<br>(3) Level 1 trauma<br>center<br>(4) IC: pts w/ TBI<br>admitted to<br>University Medical<br>Centre Gronnigen<br>EC: <15 y.o, previous<br>TBI                                                                                                                                                                                                                                                | (3) Age (Minor, Mild, Mod-<br>Sev): 42.1±16.8; 40.3±17.3;<br>35.2±18.8<br>(4) Sex(Minor, Mild, Mod-<br>Sev): 61%; 78%; 73%;<br>(5) N.R<br>(6) IS: 51 Minor; 121 Mild; 70<br>Mod-Sev<br>(7) N/A<br>(8) N.R                                                                                                                                                                                                                                                                                    | Binary LRM<br>MLRM<br>(2) P< 0.05                                                                                                                 | (2) N.R                                                                                                                                                                                                                                                                                                                 | (3) Frequency of RTW<br>(Complete RTW<br>reported*):<br>Minor (M;F): 82%; 50%<br>Mild (M;F): 72%; 55%<br>Mod-Sev (M;F): 44%;<br>47%<br>Total (M;F): 66%; 51%                                                                                                                                                                                                        | SS predictive of<br>RTW (explained<br>variance 45%) adj<br>for Age & Sex |
| Wang et al.<br>(2008)<br>Taiwan<br>0.164 (37)<br>Level IV | (1) To study the<br>clinical relevance of<br>PTA & other<br>neurologic<br>complications that<br>occur after TBI & the<br>potential prognostic<br>factors of<br>Posttraumatic<br>Seizures<br>(2) Case series<br>(3) Acute care<br>teaching medical<br>hospital<br>(4) IC: seizure after<br>head trauma<br>EC: Hx of TBI, pre-<br>existing Epilepsy,<br>gunshot wounds or<br>penetrating HI,<br>neurologic D/Os w/<br>various neurologic<br>deficits & death w/in<br>1 mo | (1) N=170 (134= Excellent<br>outcome; 36= Non-excellent<br>outcome)<br>(2) Attrition :0%<br>(3) Age (Excellent; Non-<br>Excellent): 40.5 ±24.7;<br>44.6±20.9<br>(4) Sex (Excellent; Non-<br>Excellent): 71.6%; 83.3%<br>(5) N.R<br>(6) IS (Excellent; Non-<br>Excellent) (N):<br>Mild: 19; 6<br>Mod: 10; 1<br>Sev: 105; 29<br><br>Clinical features-<br>PTA: 94; 23<br>Brief unconsciousness: 72; 20<br>GCS at ad: 10.5±3.9; 10.4±3.7<br>(7) BL: EMD<br>F/U: 1mo-204 mos post-inj<br>(8) N.R | (1) Chi-square<br>test<br>Fisher's exact<br>test<br>Student's t test<br>Wilcoxon rank<br>sum test<br>Log-rank test<br>Stepwise LRM<br>(2) P <0.10 | (1) Age, Sex,<br>Clinical features,<br>Severity, GCS,<br>Neuroimaging,<br>Onset of seizure,<br>Subtype of seizure,<br>Surgical<br>intervention &<br>Duration of<br>hospitalization<br>(2) Med Intake:<br>most pts in<br>were treated w/<br>anticonvulsant<br>meds after 1 <sup>st</sup><br>acute symptomatic<br>seizure | (1) Outcomes of<br>Posttraumatic Seizures<br>(based on seizure<br>frequency)<br>(2) CT scan & Medical<br>evaluation<br>Note: by Engel et al<br>(score<5-excellent; 5-12-<br>non-excellent)<br>(3) Frequency of Excellent<br>Outcome (M;F): 71.6%<br>(96/134); 28.4% (38/134)<br><br>Frequency of Non-<br>Excellent Outcome (M;F):<br>83.3% (30/36); 16.7%<br>(6/36) | Age, Sex & Severity<br>NS associate w<br>seizure frequency               |

|                                                                                       |                                                                                                                                                                                                                                                                                                                                                 |                                                                                                                                                                                                                                                                                                                                                                                                                                                                                                                    |                                                                    |                                                                                                                                                                                                                     |                                                                                                                                           |                                                                                                                                                                                                               |
|---------------------------------------------------------------------------------------|-------------------------------------------------------------------------------------------------------------------------------------------------------------------------------------------------------------------------------------------------------------------------------------------------------------------------------------------------|--------------------------------------------------------------------------------------------------------------------------------------------------------------------------------------------------------------------------------------------------------------------------------------------------------------------------------------------------------------------------------------------------------------------------------------------------------------------------------------------------------------------|--------------------------------------------------------------------|---------------------------------------------------------------------------------------------------------------------------------------------------------------------------------------------------------------------|-------------------------------------------------------------------------------------------------------------------------------------------|---------------------------------------------------------------------------------------------------------------------------------------------------------------------------------------------------------------|
| <p>Eramudugol la et al. (2014)</p> <p>Australia</p> <p>0.120 (24)</p> <p>Level IV</p> | <p>(1) To examine a range of TBI variables as predictors of cog outcome over 8 yrs in an adult pop, &amp; interactions w/ APOE genotype, sex, &amp; age cohorts</p> <p>(2) Case series</p> <p>(3) PATH Project</p> <p>(4) IC: extensive PATH criteria reported in another article</p> <p>EC: Hx of cerebrovascular events or Epilepsy at BL</p> | <p>(1) N= 6333<br/>20s cohort: 2077<br/>40s cohort: 2124<br/>60s cohort: 2132</p> <p>(2) Attrition (Wave 1; Wave 2): 6.5%; 16%</p> <p>(3) Age (20; 40; 60 cohort): 22.61±1.51; 42.62±1.49; 62.51±1.51</p> <p>(4) Sex(20; 40; 60 cohort): 46.7%; 46.1%; 50.5%</p> <p>(5) N.R</p> <p>(6) IS (20; 40; 60 cohort): Mild: 8.5%; 6.0%; 3.1%<br/>Mod/Sev: 90.0%; 91.4%;</p> <p>(7) N/A?</p> <p>(8) Education (20; 40; 60 cohort): 14.21±1.50; 14.43±2.28; 13.90±2.74</p> <p>Note: Note: TBI ensured by pt self-report</p> | <p>(1) Linear mixed-effects models</p> <p>(2) P&lt; 0.05</p>       | <p>(1) Sex, Age, Severity &amp; Frequency</p> <p>(2) N.R</p>                                                                                                                                                        | <p>(1) Cog functioning</p> <p>(2) CVLT, STW, SDMT, DST &amp; Simple Reaction Time</p> <p>(3) Reaction Time T-Score (M; F): ~57.5; ~54</p> | <p>Cog performance ↑ for young F (in 20s) &gt; M; pattern reversed in middle (40s) &amp; old age (60s)</p>                                                                                                    |
| <p>Gerhart et al. (2003)</p> <p>USA</p> <p>0.203 (43)</p> <p>Level III</p>            | <p>(1) To examine characteristics, circumstances of inj, tx pathways, &amp; outcomes of persons w/ TBI as a result of violence in comparison to other TBI survivors</p> <p>(2) Retrospective comparative study</p> <p>(3) State wide hospital records</p> <p>(4) IC: ≥16 y.o, resident of state,</p>                                            | <p>(1) N= 1802 (112= Violent TBI; 1689= Other TBI)</p> <p>(2) N/A</p> <p>(3) Age (Violent; Other):<br/>16-24: 30.4%; 26.8%<br/>25-34: 25.9%; 18.1%<br/>35-44: 21.4 %; 18.7%<br/>45-54: 6.3%; 12.7%<br/>55-64: 7.1%; 7.0%<br/>65+: 8.9%; 16.6%</p> <p>(4) Sex (Violent; Other):<br/>83.0%; 66.7%</p> <p>(5) TSI: 1 yr post-inj</p> <p>(6) IS:<br/>Sev (GCS 3–8): 17.0%; 12.7%</p>                                                                                                                                   | <p>(1) Chi-square test<br/>ANOVA<br/>LRM</p> <p>(2) P&lt; 0.01</p> | <p>(1) Violence, Severity, ISS, Age, Sex, Ethnicity, Working status, Relationship status, Gov funding</p> <p>(2) Pre-ink Drug Intake:<br/>Total: 4,1%<br/>Violently Incurred TBI: 7.8%<br/>All Other TBIs: 3.9%</p> | <p>(1) Cog symptomatology, Functional &amp; Societal participation</p> <p>(2) SIP-AB subscale &amp; CHART-SF</p> <p>(3) N.R</p>           | <p>SIP-AB SS: Mod inj, ISS, Age, &amp; Sex (F)</p> <p>CHART-SF-Physical independence predictive factors: Sev inj</p> <p>CHART-SF Cog independence predictive factors: Sev inj, Mod inj, Age &amp; Sex (W)</p> |

|                                                                          |                                                                                                                                                                                                                                                                                                             |                                                                                                                                                                                                                                                                                                          |                                                        |                                                                                                                                                                                                            |                                                                                                                                                                                                                                                                                                                                    |                                                                                                                                                                                                                                                                                                                 |
|--------------------------------------------------------------------------|-------------------------------------------------------------------------------------------------------------------------------------------------------------------------------------------------------------------------------------------------------------------------------------------------------------|----------------------------------------------------------------------------------------------------------------------------------------------------------------------------------------------------------------------------------------------------------------------------------------------------------|--------------------------------------------------------|------------------------------------------------------------------------------------------------------------------------------------------------------------------------------------------------------------|------------------------------------------------------------------------------------------------------------------------------------------------------------------------------------------------------------------------------------------------------------------------------------------------------------------------------------|-----------------------------------------------------------------------------------------------------------------------------------------------------------------------------------------------------------------------------------------------------------------------------------------------------------------|
|                                                                          | hospitalized w/ newly incurred TBI<br>EC: no documentation of an eligible TBI (according to CDC criteria), did not meet age or residency criteria                                                                                                                                                           | Mod (GCS 9–12): 7.1%; 7.0%<br>Mild (GCS 13–15): 75.9%; 80.3%<br>(7) N/A<br>(8) N.R                                                                                                                                                                                                                       |                                                        |                                                                                                                                                                                                            |                                                                                                                                                                                                                                                                                                                                    | <p>CHART-SF Mobility: Sev inj, Age &amp; Sex (W)</p> <p>CHART-SF Occupation SS: Sev inj, ISS, Age &amp; Sex (W)</p> <p>CHART-SF Social integration SS: Sev &amp; Mod inj</p> <p>CHART-SF Economic self-sufficiency SS: Mod inj &amp; Age</p> <p>CHART-SF total SS: Sev inj, Mod inj, ISS, Age &amp; Sex (W)</p> |
| <p>Jung et al. (2014)</p> <p>Korea</p> <p>0.067 (10)</p> <p>Level IV</p> | <p>(1) To explore the relationship in demographic &amp; clinical variables, neurocognitive, &amp; functional outcome that could be used as prognostic factor for old aged pts w/ TBI</p> <p>(2) Case series</p> <p>(3) Multiple hospitals</p> <p>(4) IC: received hospital or ambulant tx for brain inj</p> | <p>(1) 162 (85= Junior-ES; 77= Senior-ES)</p> <p>(2) N/A</p> <p>(3) Age :<br/>55-59: 20.4%;<br/>60-64: 32.1%;<br/>65-69: 24.1%<br/>70-74: 13.6%<br/>75-80: 9.9%<br/>Mean: 60.16±3.08; 70.38±4.37</p> <p>(4) Sex: 71.0%</p> <p>(5) TSI: 20.90± 34.92 mos</p> <p>(6) IS:<br/>LOC: 64.8%</p> <p>(7) N/A</p> | <p>(1) ANOVA<br/>MLRM<br/>LRM</p> <p>(2) P&lt;0.05</p> | <p>(1) Sex, Age, Education, Residence, Cause of visit, LOC, Comorbidity, Operation, MMSE, Attention, Confrontational naming, Visuospatial functioning, Verbal memory, Visual memory, Generative naming</p> | <p>(1) Functional &amp; Neurocognitive outcomes</p> <p>(2) SNSB, MMSE, DST, Korean version of Boston Naming Test, ROCF, Stroop Test &amp; CDR</p> <p>(3) Mean Neurocognitive Scores (M;F):<br/>MMSE<br/>Low score: 19.03±6.52; 14.21±7.31<br/>Standard score:<br/>-4.71±4.16; -5.98±4.49<br/>Attention: -1.25±1.58; -1.65±2.66</p> | <p>Sex SS effect on MMSE score, Confrontational naming, Generative naming &amp; CDR</p> <p>Age SS effect on Verbal memory</p> <p>LOC SS effect on CDR</p> <p>For functional outcome: Age, Sex &amp; LOC NS</p>                                                                                                  |

|                                                                    |                                                                                                                                                                                                                                                                                                                                                                                                       |                                                                                                                                                                                                                                                                                                                    |                                                     |                                                                                     |                                                                                                                                                                                                                                                                                                                                                                                                                              |                                                                                                                                                                                                                                                                                                                                     |
|--------------------------------------------------------------------|-------------------------------------------------------------------------------------------------------------------------------------------------------------------------------------------------------------------------------------------------------------------------------------------------------------------------------------------------------------------------------------------------------|--------------------------------------------------------------------------------------------------------------------------------------------------------------------------------------------------------------------------------------------------------------------------------------------------------------------|-----------------------------------------------------|-------------------------------------------------------------------------------------|------------------------------------------------------------------------------------------------------------------------------------------------------------------------------------------------------------------------------------------------------------------------------------------------------------------------------------------------------------------------------------------------------------------------------|-------------------------------------------------------------------------------------------------------------------------------------------------------------------------------------------------------------------------------------------------------------------------------------------------------------------------------------|
|                                                                    | EC: pre-injury neurological D/Os, cannot complete did neurocognitive function tests due to TBI                                                                                                                                                                                                                                                                                                        | (8) Education: 6.01±4.54 yrs                                                                                                                                                                                                                                                                                       |                                                     | & Inhibitory control<br>(2) N.R                                                     | Confrontational naming: -1.81±2.28; -3.13±1.87<br>Visuospatial functioning: -4.72±4.23; -5.10±4.82<br>Verbal memory: -2.01±1.20; -2.23±0.96<br>Visual memory: -1.69±1.16; -1.94±0.83<br>Generative naming: -1.59±0.94; -1.95±0.71<br>Inhibitory control: -2.84±1.60; -3.39±1.54<br>CDR score: 1.51±0.91; 1.82±1.10                                                                                                           |                                                                                                                                                                                                                                                                                                                                     |
| Mellick et al. (2003)<br><br>USA<br><br>0.203 (43)<br><br>Level IV | (1) To identify the factors that determine the pathways of care people w/ TBI follow after acute care DC, & to identify diff in outcome based on those pathways<br>(2) Case-control study w/ 1 yr look back<br>(3) Statewide, population-based Colorado TBI Registry & F/U System<br>(4) IC: ≥16 y.o, DC from acute care in 1996- 1997, eligible for inclusion in the statewide, population-based TBI | (1) N= 1802 (weighted sample corrected for non-respondents)<br>(2) Attrition: 41.9%<br>(3) Age: 40.6±19.9<br><25: 27.0%<br>25-44: 37.3%<br>45-64: 19.4%<br>>65: 16.2%<br>(4) Sex: 67.7%<br>(5) N.R<br>(6) IS: GCS- Mild: 80.0%<br>Mod: 7.0%<br>Sev: 13.0%<br>(7) AT: BL: U/S<br>F/U: 12-18 mos post-inj<br>(8) N.R | (1) Chi-square test<br>ANOVA<br>LRM<br>(2) P < 0.05 | (1) Severity, Age, Sex, Minority, Working, Gov funding & Pathway of care<br>(2) N.R | (1) Pt Care Pathway, Physical independence, Community integration, Cog symptomology & Health perception<br>(2) Interview, FIM, CHART, SIP, HSQ-12<br>(3) Frequency of Care Pathways (M;F):<br>Inpt rehab then home/community: 7.2%; 8.8%<br>Inpt rehab then home/community w/ outpt services: 8.7%; 7.2%<br>Inpt rehab then to LTC: 2.2%; 3.5%<br>LTC- no inpt rehab: 2.8%; 4.7%<br>Directly to home/community: 67.0%; 59.1% | Sex SS associate w Rehab Services, Physical independence, Community integration, Cog symptomatology & Health perception<br><br>Age SS factor for all pathways of care, Physical independence & Cog symptomology<br><br>Sev inj SS factors for all outcomes of interest; Mod inj severity SS for Rehab, LTC, Physical independence & |

|                                                                   |                                                                                                                                                                                                                                                                                                        |                                                                                                                                                                                                                                                                                                                                                                                                                                                           |                                                                                                                                                                    |                                               |                                                                                                                           |                                                                                                                                                                                                                                                                                    |
|-------------------------------------------------------------------|--------------------------------------------------------------------------------------------------------------------------------------------------------------------------------------------------------------------------------------------------------------------------------------------------------|-----------------------------------------------------------------------------------------------------------------------------------------------------------------------------------------------------------------------------------------------------------------------------------------------------------------------------------------------------------------------------------------------------------------------------------------------------------|--------------------------------------------------------------------------------------------------------------------------------------------------------------------|-----------------------------------------------|---------------------------------------------------------------------------------------------------------------------------|------------------------------------------------------------------------------------------------------------------------------------------------------------------------------------------------------------------------------------------------------------------------------------|
|                                                                   | F/U system, sev TBI or were in a 20% random sample w/ milder inj, consented to participate in a 1 yr post-inj F/U survey<br>EC: Homebound nursing services & visits to physicians                                                                                                                      |                                                                                                                                                                                                                                                                                                                                                                                                                                                           |                                                                                                                                                                    |                                               | Directly to home/community w/ outpt services: 12.0%; 16.7%<br><br>(% w/ respect to total pop-based on weighted frequency) | Community integration                                                                                                                                                                                                                                                              |
| Mygra et al. (2016)<br><br>USA<br><br>0.203 (43)<br><br>Level III | (1) To investigate whether sex & DA-gene interactions influence cog post-TBI<br>(2) Prospective study of non-consecutive patients<br>(3) Inpt & outpt clinics at level 1 trauma center<br>(4) IC: non-penetrating TBI, AD GCS $\leq 8$ (sev), CT w/ evidence of Intracranial inj, 16-75 y.o<br>EC: N.R | (1) N -Variant (Grouping): ANKK1 = 181 (Hetero=66; Homo=115)<br><br>DRD2= 173 (C/C=96; G-Carr=77)<br><br>COMT= 171 (Val Car=121; Met/Met= 50)<br><br>VMAT= 182 (G-Carr=86; C/C=96)<br><br>DAT= 174 (10/10=75; 9-Carr=99)<br>(2) N.R<br>(3) Age: ANKK1<br>Hetero: $33.30 \pm 13.45$<br>Homo: $32.61 \pm 13.26$<br>DRD2<br>C/C: $33.95 \pm 13.51$<br>G-Carr: $31.64 \pm 13.06$<br>COMT<br>Val Carr: $32.47 \pm 13.41$<br>Met/Met: $33.30 \pm 13.14$<br>VMAT | (1) Mann-Whitney ANOVA<br>Kruskal-Wallis, t tests<br>Chi-square test as appropriate.<br>Spearman or Pearson correlation<br>Multivariate model<br>(2) $P \leq 0.05$ | (1) Age, Sex, GCS, Education & GRS<br>(2) N.R | (1) Cog<br>(2) D-KEFS, COWAT, TMT, DST, WAIS, CVLT-II, ROCF & Stroop Interference<br>(3) N.R                              | sex-specific risk allele assignment/weighting noted:<br><br>SS sex $\times$ gene interaction observed at 6 & 12 mos for ANKK1 rs1800497 & COMT rs4680<br>DRD2 rs6279 & VMAT genotypes independently assoc w/ cog at 6 mos, w/ trends for a sex $\times$ gene interaction at 12 mos |

|  |  |                                                                                                                                                                                                                                                                                                                                                                                                                                                                                                                                                                                                                                                                                                                                                                                                                                                 |  |  |  |  |
|--|--|-------------------------------------------------------------------------------------------------------------------------------------------------------------------------------------------------------------------------------------------------------------------------------------------------------------------------------------------------------------------------------------------------------------------------------------------------------------------------------------------------------------------------------------------------------------------------------------------------------------------------------------------------------------------------------------------------------------------------------------------------------------------------------------------------------------------------------------------------|--|--|--|--|
|  |  | <p> G-Carr: <math>33.43 \pm 14.01</math><br/> C/C: <math>32.23 \pm 12.65</math><br/> DAT<br/> 10/10: <math>32.65 \pm 12.69</math><br/> 9-Carr: <math>33.10 \pm 13.97</math><br/> (4) Sex: (unclear) % W<br/> ANKK1<br/> Hetero: 19.69%<br/> Homo: 18.26%<br/> DRD2<br/> C/C: 14.58%<br/> G-Carr: 22.08%<br/> COMT<br/> Val Carr: 20.67%<br/> Met/Met: 12.00%<br/> VMAT<br/> G-Carr: 20.93%<br/> C/C: 16.67%<br/> DAT<br/> 10/10: 17.33%<br/> 9-Carr: 20.20%<br/> (5) TSI: w/in 24h post-inj<br/> (6) IS:<br/> GCS: 7 (all groups)<br/> (7) AT:<br/> BL: 6mos<br/> F/U: 12 mos<br/> (8) Education:<br/> ANKK1<br/> Hetero: <math>12.56 \pm 1.82</math><br/> Homo: <math>12.76 \pm 1.86</math><br/> DRD2<br/> C/C: <math>12.93 \pm 2.00</math><br/> G-Carr: <math>12.50 \pm 1.71</math><br/> COMT<br/> Val Carr: <math>12.68 \pm 1.81</math> </p> |  |  |  |  |
|--|--|-------------------------------------------------------------------------------------------------------------------------------------------------------------------------------------------------------------------------------------------------------------------------------------------------------------------------------------------------------------------------------------------------------------------------------------------------------------------------------------------------------------------------------------------------------------------------------------------------------------------------------------------------------------------------------------------------------------------------------------------------------------------------------------------------------------------------------------------------|--|--|--|--|



|                                                                     |                                                                                                                                                                                                                                                                                                                                                                                                                                                                                                                           |                                                                                                                                                                                                                                                                               |                                            |                                                   |                                                                                                                                                                                                                                                                                                                                                                                                                                                                                                                                                                                                                                            |                                                                                                    |
|---------------------------------------------------------------------|---------------------------------------------------------------------------------------------------------------------------------------------------------------------------------------------------------------------------------------------------------------------------------------------------------------------------------------------------------------------------------------------------------------------------------------------------------------------------------------------------------------------------|-------------------------------------------------------------------------------------------------------------------------------------------------------------------------------------------------------------------------------------------------------------------------------|--------------------------------------------|---------------------------------------------------|--------------------------------------------------------------------------------------------------------------------------------------------------------------------------------------------------------------------------------------------------------------------------------------------------------------------------------------------------------------------------------------------------------------------------------------------------------------------------------------------------------------------------------------------------------------------------------------------------------------------------------------------|----------------------------------------------------------------------------------------------------|
|                                                                     |                                                                                                                                                                                                                                                                                                                                                                                                                                                                                                                           | Met/Met: $12.64 \pm 1.98$<br>VMAT<br>G-Carr: $12.72 \pm 1.76$<br>C/C: $12.69 \pm 1.93$<br>DAT<br>10/10: $12.56 \pm 1.70$<br>9-Carr: $12.87 \pm 1.85$                                                                                                                          |                                            |                                                   |                                                                                                                                                                                                                                                                                                                                                                                                                                                                                                                                                                                                                                            |                                                                                                    |
| Tsushima et al. (2009)<br><br>USA<br><br>0.203 (43)<br><br>Level IV | (1) To investigate possible sex diff in neuropsychological functioning in pts following mTBI<br>(2) Case series<br>(3) Private medical center<br>(4) IC: sustained a mTBI, confusion or disorientation, LOC $\leq 30$ ; PTA $< 24$ h, focal signs, seizure & intracranial lesion, GCS score 13–15<br>>30 mins post-inj, not be due to drugs, alcohol or med, caused by other inj or tx for other inj (e.g. systemic inj, facial inj or intubation), caused by other problems or penetrating Craniocerebral inj<br>EC: N.R | (1) N= 102<br>(2) N/A<br>(3) Age (M; W): $42.08 \pm 15.23$ ; $41.85 \pm 14.07$<br>(4) Sex: 60.78%<br>(5) TSI in mos ( <b>M;F</b> ): $22.37 \pm 20.42$ ; $25.39 \pm 23.88$<br>(6) IS: mTBI<br>(7) N/A<br>(8) Education ( <b>M;F</b> ): $13.49 \pm 2.19$ ; $14.45 \pm 3.21$ yrs | (1) T tests<br>MANOVA<br>(2) $P \leq 0.05$ | (1) Age, Education, Mos post-inj & Sex<br>(2) N.R | (1) Neuropsychological outcome<br>(2) Halstead-Reitan Neuropsychological Test Battery, WAIS-III, WMS-III, Wide Range Achievement 2 & 3, Dynamometer, Purdue Pegboard & Grooved Pegboard<br>(3) Neuropsychological Scores (M;F):<br>Finger Tapping<br>Dominant $33.84 \pm 12.66$ ; $35.30 \pm 9.16$<br>Finger Tapping<br>Non-dominant $32.50 \pm 12.90$ ; $37.20 \pm 12.62$<br>Speech Sounds<br>Perception $10.36 \pm 7.58$ ; $7.26 \pm 4.42$<br>Seashore Rhythm<br>$4.98 \pm 3.18$ ; $4.68 \pm 2.77$<br>Tactual Performance<br>Time $16.69 \pm 8.54$ ; $17.89 \pm 7.27$<br>Tactual Performance<br>Memory $7.60 \pm 1.99$ ; $7.16 \pm 2.80$ | NS effect of Sex, Mos post-inj or Sex-by-mos post-inj on outcome<br><br>SS Age & Sex-by-age effect |

|                                                                            |                                                                                                                                                                                                                                                                                                         |                                                                                                                                                                                                                                                                                                                                                                                                                                                                                                                                                                                                                                              |                                                                                                                      |                                                                                                                         |                                                                                                                                                                                                                                                                                                      |                                                                                                                                                                                                                                                  |
|----------------------------------------------------------------------------|---------------------------------------------------------------------------------------------------------------------------------------------------------------------------------------------------------------------------------------------------------------------------------------------------------|----------------------------------------------------------------------------------------------------------------------------------------------------------------------------------------------------------------------------------------------------------------------------------------------------------------------------------------------------------------------------------------------------------------------------------------------------------------------------------------------------------------------------------------------------------------------------------------------------------------------------------------------|----------------------------------------------------------------------------------------------------------------------|-------------------------------------------------------------------------------------------------------------------------|------------------------------------------------------------------------------------------------------------------------------------------------------------------------------------------------------------------------------------------------------------------------------------------------------|--------------------------------------------------------------------------------------------------------------------------------------------------------------------------------------------------------------------------------------------------|
|                                                                            |                                                                                                                                                                                                                                                                                                         |                                                                                                                                                                                                                                                                                                                                                                                                                                                                                                                                                                                                                                              |                                                                                                                      |                                                                                                                         | <p>Tactual Performance<br/>Location 3.49±2.35; 3.47±2.23<br/>TMT A 34.79±15.31;<br/>39.92±29.80<br/>TMT B 86.69±39.32;<br/>82.15±39.32<br/>Category 33.79±18.88;<br/>41.42±24.7</p>                                                                                                                  |                                                                                                                                                                                                                                                  |
| <p>Corrigan et al. (2007)</p> <p>USA</p> <p>0.203 (43)</p> <p>Level II</p> | <p>(1) To determine whether there are sex diff in employment 1 yr after TBI</p> <p>(2) Prospective cohort study, secondary data analyses</p> <p>(3) Acute care hospitals in South Carolina &amp; TBIMS rehab centers</p> <p>(4) IC: TBI, informed consent, ≥16 y.o, inpt rehab, working<br/>EC: N.R</p> | <p>(1) N= 3444 (327=↑ h; 1257=same h; 443=↓ h; 1417= stop working)</p> <p>(2) N/A</p> <p>(3) Age (↑ h; same h; ↓ h; stop working): 30.2±12.0; 37.2±12.7; 34.4±12.1; 35.6±12.4<br/>55-64 (%): 4.9; 11.0; 7.5; 9.4<br/>45-54 (%):10.1; 20.9; 15.6; 15.4<br/>35-44 (%):17.1; 23.9; 25.3; 25.8<br/>25-34 (%):21.7; 22.0; 22.1; 23.6<br/>20-24 (%):26.6; 15.5; 20.5; 18.1<br/>18-19 (%):19.6; 6.8; 9.0; 7.6</p> <p>(4) Sex (↑ h; same h; ↓ h; stop working): 74.0%; 70.5%; 67.0%; 75.0%</p> <p>(5) TSI: 1 yr post-inj</p> <p>(6) IS (↑ h; same h; ↓ h; stop working):<br/>AIS (%) -<br/>5: 6.7; 10.3; 9.5; 15.7<br/>4: 45.9; 49.4; 50.1; 54.6</p> | <p>(1) Chi-square test</p> <p>Multivariable model</p> <p>Polychotomous logistic regression</p> <p>(2) P &lt;0.05</p> | <p>(1) Age, Sex, Race, Education, Marital status, Payer group, AIS, CT group, LOS, Preinj employment</p> <p>(2) N.R</p> | <p>(1) Employment status</p> <p>(2) Interview</p> <p>(3) Frequency of Employment Status (M;F):<br/>↑ h: 74.0% (242/327); 26.0% (85/ 327)</p> <p>Same h: 70.5% (886/1257); 29.5% (371/1257)</p> <p>↓ h: 67.0% (297/443); 33.0% (146/443)</p> <p>Stop working: 75.0% (1063/1417); 25.0% (354/1417)</p> | <p>↑h: Age (55-64, 45-54, 35-44), Sex, AIS 5, Sex-by-age &amp; Sex-by-marital status SS</p> <p>Same h: Age (45-54, 25-34, 20-24), Sex, Sex-by-age (20-24 only), &amp; Sex-by-marital status SS</p> <p>↓h &amp; Still working: Age (55-64) SS</p> |

|                                                                      |                                                                                                                                                                                                                                                                                                                                                                  |                                                                                                                                                                                                                                                                                                                                                                                                        |                                                   |                                                                                                                                                                                                                                          |                                                            |                                                                                                                                                                                                                                                                                                                         |
|----------------------------------------------------------------------|------------------------------------------------------------------------------------------------------------------------------------------------------------------------------------------------------------------------------------------------------------------------------------------------------------------------------------------------------------------|--------------------------------------------------------------------------------------------------------------------------------------------------------------------------------------------------------------------------------------------------------------------------------------------------------------------------------------------------------------------------------------------------------|---------------------------------------------------|------------------------------------------------------------------------------------------------------------------------------------------------------------------------------------------------------------------------------------------|------------------------------------------------------------|-------------------------------------------------------------------------------------------------------------------------------------------------------------------------------------------------------------------------------------------------------------------------------------------------------------------------|
|                                                                      |                                                                                                                                                                                                                                                                                                                                                                  | 3: 22.0; 16.1; 19.6; 14.4<br>2: 25.4; 24.2; 20.8; 15.4;<br><br>CT group-<br>Unknown: 9.5; 13.9; 9.3; 9.7<br>Abnormal: 68.5; 65.0; 68.0;<br>76.7<br>Normal: 22.0; 21.2; 22.8; 13.6;<br>(7) N/A<br>(8) Education (%) (↑ h; same<br>h; ↓ h; stop working):<br>College +: 46.5; 36.3; 44.5;<br>32.8<br>12 or GED: 37.3; 34.4; 35.9;<br>36.8<br><12y: 14.4; 26.6; 18.1; 27.3<br>Unknown: 1.8; 2.8; 1.6; 3.0 |                                                   |                                                                                                                                                                                                                                          |                                                            |                                                                                                                                                                                                                                                                                                                         |
| Dahdah et<br>al. (2016)<br><br>USA<br><br>0.203 (43)<br><br>Level II | (1) To compare pt<br>functional outcomes<br>following TBI & to<br>determine factors<br>that influence those<br>outcomes<br>(2) Prospective<br>cohort study,<br>secondary data<br>analyses<br>(3) 19 TBIMS<br>rehabilitation centers<br>(4) IC: pts aged ≥ 16<br>yrs, mod- sev TBI<br>caused by blunt or<br>penetrating<br>Inj<br>EC: rehab AD<br>occurring ≥30 d | (1) N=5505<br>(2) N.R<br>(3) Age: 42±20<br>(4) Sex: 72%<br>(5) TSI: 14±7d<br>(6) IS: mod-sev TBI<br>PTA duration (d):<br>22±18<br>(7) AT:<br>BL: DC<br>F/U: 1yr<br>(8) Education:<br>High school diploma or less:<br>60%                                                                                                                                                                               | (1) Logistic<br>regression<br>model<br>(2) P≤0.01 | (1) Functional<br>status at AD, Sex,<br>Marital status,<br>Race, CT scan,<br>Insurance, Geo unit<br>quality score, LOS,<br>Mechanism of TBI,<br>Education,<br>Employment,<br>Alcohol or drug<br>use, CCI &<br>Duration of PTA<br>(2) N.R | (1) Functional outcomes<br>(2) DRS, FIM & GOS-E<br>(3) N.R | DRS DC & 1Yr:<br>Longer duration PTA<br>was SS predictor of<br>outcome- Abnormal<br>CT & Sex NS<br><br>FIM DC & 1Yr: Sex<br>& Longer duration<br>PTA SS predictors of<br>outcome- Abnormal<br>CT SS only at FIM 1<br>Yr<br><br>GOS-E 1Yr: Longer<br>duration PTA SS<br>predictor of<br>outcome- Abnormal<br>CT & Sex NS |

|                                                           |                                                                                                                                                                                                                                                                                                                                                                                                                                                                                                                                                           |                                                                                                                                                                                                                                                                                                                                                                                                                                                                                                                                                                                                                |                                     |                                                                                                                                                                                                                 |                                                               |                                                                                                                                                                    |
|-----------------------------------------------------------|-----------------------------------------------------------------------------------------------------------------------------------------------------------------------------------------------------------------------------------------------------------------------------------------------------------------------------------------------------------------------------------------------------------------------------------------------------------------------------------------------------------------------------------------------------------|----------------------------------------------------------------------------------------------------------------------------------------------------------------------------------------------------------------------------------------------------------------------------------------------------------------------------------------------------------------------------------------------------------------------------------------------------------------------------------------------------------------------------------------------------------------------------------------------------------------|-------------------------------------|-----------------------------------------------------------------------------------------------------------------------------------------------------------------------------------------------------------------|---------------------------------------------------------------|--------------------------------------------------------------------------------------------------------------------------------------------------------------------|
|                                                           | post-inj, inpt rehab course exceeding 90 d, died during inpt rehab, concomitant neurologic Dx, rehab AD before 2003                                                                                                                                                                                                                                                                                                                                                                                                                                       |                                                                                                                                                                                                                                                                                                                                                                                                                                                                                                                                                                                                                |                                     |                                                                                                                                                                                                                 |                                                               |                                                                                                                                                                    |
| Forslund et al. (2017)<br>Norway<br>0.053 (6)<br>Level IV | <p>(1) To assess longitudinal trajectories of overall Disability after mod-sev TBI &amp; examine whether the trajectories could be predicted by sociodemographic &amp; inj characteristics</p> <p>(2) Case series</p> <p>(3) Trauma center</p> <p>(4) IC: 16-55 y.o. residence in eastern Norway, AD w/ ICD-10 Dx w/in 24h of inj, presence of mod-sev TBI w/ GCS 3-12 at AD or before intubation</p> <p>EC: previous neurological D/Os/inj, assoc SCI, previously diagnosed sev psychiatric or substance abuse D/O, unknown address or incarceration</p> | <p>(1) N= 105</p> <p>(2) Attrition: 11%</p> <p>(3) Age: 30.9±11.2</p> <p>(4) Sex: 78.1%</p> <p>(5) TSI: Acute phase</p> <p>(6) IS: GCS</p> <p>Mod (9-12): 32.4%</p> <p>Sev (3-8): 67.6%</p> <p>ISS</p> <p>Score 0-29: 46.6%</p> <p>Score 30+: 55.3%</p> <p>PTA</p> <p>0-18d: 59.7%</p> <p>19+d: 40.3%</p> <p>CT Head Marshall Score:</p> <p>Score 1-2: 46.6%</p> <p>Score 3+: 53.4%</p> <p>(7) At:</p> <p>BL: Acute phase</p> <p>t<sub>1</sub>: 1yr post-inj</p> <p>t<sub>2</sub>: 2 yrs post-inj</p> <p>t<sub>3</sub>: 5 yrs post-inj</p> <p>(8) Education</p> <p>≤12 yrs: 56.7%</p> <p>&gt;12 yrs: 43.3%</p> | <p>(1) HLM</p> <p>(2) P&lt;0.05</p> | <p>(1) Time, Sex, Age, Relationship status at AD, education, Employment status</p> <p>Pre-inj, Prior occupation, Acute GCS score, Cause of inj, PTA length, CT Head Marshall Score &amp; ISS</p> <p>(2) N.R</p> | <p>(1) Overall Disability</p> <p>(2) GOS-E</p> <p>(3) N.R</p> | <p>↑ GOS-E trajectories (↓ Disability)</p> <p>predicted by younger age at inj &amp; shorter PTA &amp; interaction of time*PTA – Sex, ISS, CT Head inj score NS</p> |

|                                                                             |                                                                                                                                                                                                                                                                                                                                                                           |                                                                                                                                                                                                                                                                                                                                                                   |                                                                                                                                                          |                                                   |                                                                                                                                                                                                                                                                                                                                                                                                                                                                                                                                                                                                                                                                                                                                                                    |                                                                                                                                                                                                                                                                                                                                                                                                                                                                 |
|-----------------------------------------------------------------------------|---------------------------------------------------------------------------------------------------------------------------------------------------------------------------------------------------------------------------------------------------------------------------------------------------------------------------------------------------------------------------|-------------------------------------------------------------------------------------------------------------------------------------------------------------------------------------------------------------------------------------------------------------------------------------------------------------------------------------------------------------------|----------------------------------------------------------------------------------------------------------------------------------------------------------|---------------------------------------------------|--------------------------------------------------------------------------------------------------------------------------------------------------------------------------------------------------------------------------------------------------------------------------------------------------------------------------------------------------------------------------------------------------------------------------------------------------------------------------------------------------------------------------------------------------------------------------------------------------------------------------------------------------------------------------------------------------------------------------------------------------------------------|-----------------------------------------------------------------------------------------------------------------------------------------------------------------------------------------------------------------------------------------------------------------------------------------------------------------------------------------------------------------------------------------------------------------------------------------------------------------|
| <p>Kirkness et al. (2004)</p> <p>USA</p> <p>0.203 (43)</p> <p>Level III</p> | <p>(1) To examine the interaction of sex &amp; age in relation to outcome at 3 &amp; 6mos post-inj in pts w TBI</p> <p>(2) Prospective comparative study</p> <p>(3) Level 1 trauma center</p> <p>(4) IC: <math>\geq 16</math> y.o, AD to ICU at level 1 trauma center w/ Dx of TBI, &amp; ICP &amp; CPP monitoring</p> <p>EC: bilateral fixed pupils, impending death</p> | <p>(1) N= 157</p> <p>(2) 0%</p> <p>(3) Age (M; W): <math>36.3 \pm 17.4</math>; <math>39.9 \pm 20.7</math></p> <p>(4) Sex: 79.0%</p> <p>(5) TSI: 3 mos post-inj</p> <p>(6) IS (M;F): ISS: <math>28.6 \pm 9.8</math>; <math>30.1 \pm 9.1</math></p> <p>AIS head score (=5): 31%; 52%</p> <p>(7) AT: BL: 3mos post-inj</p> <p>F/U: 6 mos post-inj</p> <p>(8) N.R</p> | <p>(1) Student's t test</p> <p>Chi square test</p> <p>Fisher's exact test</p> <p>Mann-Whitney U test</p> <p>MLRM</p> <p>(2) <math>P &lt; 0.05</math></p> | <p>(1) Sex, AIS, GCS &amp; Age</p> <p>(2) N.R</p> | <p>(1) Functional outcome</p> <p>(2) GOS-E &amp; FSE</p> <p>(3) Mean Scores: GOS-E 3mos (younger M; older M; younger F; older F): <math>3.75 \pm 1.6</math>; <math>3.66 \pm 1.7</math>; <math>3.88 \pm 1.5</math>; <math>2.76 \pm 1.4</math></p> <p>GOS-E 6mos (younger M; older M; younger F; older F): <math>4.83 \pm 2.1</math>; <math>4.09 \pm 2.2</math>; <math>4.56 \pm 1.8</math>; <math>2.71 \pm 1.3</math>)</p> <p>FSE 3mos (younger M; older M; younger W; older F): <math>21.5 \pm 6.8</math>; <math>21.8 \pm 7.4</math>; <math>22.1 \pm 7.3</math>; <math>26.6 \pm 4.1</math></p> <p>FSE 6mos (younger M; older M; younger F; older W): <math>17.0 \pm 9.1</math>; <math>19.9 \pm 9.4</math>; <math>18.1 \pm 8.3</math>; <math>26.2 \pm 4.3</math></p> | <p>GOSEGB-by-sex: SS predictors of outcome were AIS head*GCS-PR*Age &amp; AIS head*GCS-PR-M* Age</p> <p>GOSEGB-by-sex for subjects &lt; 30: NS predictors of outcome</p> <p>GOSEGB-by-sex for subjects <math>\geq 30</math> y.o: SS predictors include: Uncontrolled, AIS head*GCS-PR &amp; AIS head*GCS-PR-M</p> <p>Interaction of Sex &amp; Age (Younger M, Older M, Younger F) SS predictors were: Uncontrolled, AIS head*GCS-PR &amp; AIS head*GCS-PR-M</p> |
|-----------------------------------------------------------------------------|---------------------------------------------------------------------------------------------------------------------------------------------------------------------------------------------------------------------------------------------------------------------------------------------------------------------------------------------------------------------------|-------------------------------------------------------------------------------------------------------------------------------------------------------------------------------------------------------------------------------------------------------------------------------------------------------------------------------------------------------------------|----------------------------------------------------------------------------------------------------------------------------------------------------------|---------------------------------------------------|--------------------------------------------------------------------------------------------------------------------------------------------------------------------------------------------------------------------------------------------------------------------------------------------------------------------------------------------------------------------------------------------------------------------------------------------------------------------------------------------------------------------------------------------------------------------------------------------------------------------------------------------------------------------------------------------------------------------------------------------------------------------|-----------------------------------------------------------------------------------------------------------------------------------------------------------------------------------------------------------------------------------------------------------------------------------------------------------------------------------------------------------------------------------------------------------------------------------------------------------------|

|                                                                         |                                                                                                                                                                                                                                                                                                                                                                   |                                                                                                                                                                                                                                                                                                               |                                                                                      |                                                                                                                   |                                                                                                                                                                         |                                                                                                                                        |
|-------------------------------------------------------------------------|-------------------------------------------------------------------------------------------------------------------------------------------------------------------------------------------------------------------------------------------------------------------------------------------------------------------------------------------------------------------|---------------------------------------------------------------------------------------------------------------------------------------------------------------------------------------------------------------------------------------------------------------------------------------------------------------|--------------------------------------------------------------------------------------|-------------------------------------------------------------------------------------------------------------------|-------------------------------------------------------------------------------------------------------------------------------------------------------------------------|----------------------------------------------------------------------------------------------------------------------------------------|
| Leitgeb et al. (2011)<br><br>Austria<br><br>0.078 (14)<br><br>Level III | (1) To investigate sex diff in outcome after TBI<br>(2) Retrospective comparative study<br>(3) 17 medical centers<br>(4) IC: isolated TBI, survived at least until AD to ICU<br>EC: no additional inj with an AIS>2                                                                                                                                               | (1) N= 439<br>(2) Attrition: 3.2%<br>(3) Age (M; W): 50.4±21.5; 61.4±22.6<br>(4) Sex: 69.5%<br>(5) TSI: 6mos post-inj<br>(6) IS (M;F): AIS Head: 4.16±0.81; 4.21±0.93<br>ISS: 21.5±13.7; 23.2±17.9<br>GCS: 5.58± 2.83; 5.17±2.47<br>(7) AT: BL: TOI (recorded by paramedics)<br>F/U: 6mos post-inj<br>(8) N.R | (1) Two-tailed t test<br>Fisher's exact test<br>Chi-square test<br>LRM<br>(2) P<0.05 | (1) Age, Pupil abnormality, ISS, AIS Head, GCS, CT, Inj mechanism, Presence of Subdural Hematoma & Sex<br>(2) N.R | (1) ICU survival, Hospital survival & Favourable outcome<br>(2) Medical records, GOS & CT<br>(3) Frequency of Hospital Mortality (M;F): 32.5% (99/305) ; 39.6% (53/134) | Sex NS predictor of Mortality or Favorable outcome<br><br>Age & IS (ISS, AIS, CT) were SS associate wof Mortality & Favourable outcome |
| Rao et al. (2008)<br><br>USA<br><br>0.203 (43)<br><br>Level IV          | (1) To assess the prevalence & risk factors for sleep disturbances in the acute post-TBI period<br>(2) Case series<br>(3) Trauma unit at Hopkins & the Brain Injury unit at Kernan Hospital, University of Maryland<br>(4) IC: first-time CHI w/in 3 mos of trauma, ability to provide consent personally, ≥18 y.o<br>EC: prior TBI, open-HI, Hx of Brain Illness | (1) N=54<br>(2) Attrition: 0%<br>(3) Age: 43.2±17.7<br>(4) Sex: 59.0%<br>(5) TSI: w/in 3 mons of trauma<br>(6) IS: GCS 13-15 (mTBI): 65%<br>GCS 9-12 (mod TBI): 11%<br>GCS ≤8 (sev TBI): 19%<br>(7) AT: BL: w/in 2 wks post-inj<br>F/U: 1-3 mos post-inj<br>(8) Education: 13.2±3.1                           | (1) Repeated measures ANOVA<br>MRM<br>(2) P< 0.05                                    | (1) Age, Sex, MDGMC, GADGMC, GMHR, Body inj & GCS<br>(2) N.R                                                      | (1) Change in sleep domains<br>(2) MOS<br>(3) N.R                                                                                                                       | Sex SS predictive of SOBHA<br>Age SS predictive of Snoring & Daytime Sleepiness<br>No severity diff identified                         |

|                                                                            |                                                                                                                                                                                                                                                                                                      |                                                                                                                                                                                                                                        |                                                                     |                                                                                                                                 |                                                                                                                                                                                                                                                                                                                                                                                              |                                                                                                                                                                                                                                                                                                                |
|----------------------------------------------------------------------------|------------------------------------------------------------------------------------------------------------------------------------------------------------------------------------------------------------------------------------------------------------------------------------------------------|----------------------------------------------------------------------------------------------------------------------------------------------------------------------------------------------------------------------------------------|---------------------------------------------------------------------|---------------------------------------------------------------------------------------------------------------------------------|----------------------------------------------------------------------------------------------------------------------------------------------------------------------------------------------------------------------------------------------------------------------------------------------------------------------------------------------------------------------------------------------|----------------------------------------------------------------------------------------------------------------------------------------------------------------------------------------------------------------------------------------------------------------------------------------------------------------|
| Mollaveva<br>et al. (2015)<br><br>Canada<br><br>0.098 (18)<br><br>Level IV | (1) To describe<br>Community<br>Integration & its<br>assoc factors in<br>insured Ontario<br>workers w/ PCS<br>(2) Cross-sectional<br>(3) Rehab hospital<br>(4) IC: Workers w/<br>mTBI or concussion<br>Dx<br>EC: w/o brain inj or<br>inj due to<br>electrocution, mod-<br>sev TBI                    | (1) N= 94<br>(2) N/A<br>(3) Age: 45.2±9.94<br>(4) Sex: 62%<br>(5) TSI: 197 (416-139)d post-<br>inj<br>(6) IS: mTBI<br>(7) N/A<br>(8) Education:<br>≤High school: 36%<br>High school-college,<br>prof. diploma: 34%<br>≥University: 27% | (1) Spearman's<br>correlation<br>Bivariate RM<br>MLRM<br>(2) P≤0.05 | (1) Variables w/in:<br>Sociodemographic,<br>Clinical, Claim-<br>related, Family-<br>related, Social &<br>Inj-related<br>(2) N.R | (1) Community Integration<br>(2) Medical records & CIQ<br>(3) CIQ Score (M; F):<br>13.96±4.67; 15.56±6.01                                                                                                                                                                                                                                                                                    | Sex & Age NS<br>predictors of<br>outcome                                                                                                                                                                                                                                                                       |
| Ng et al.<br>(2006)<br><br>Singapore<br><br>0.068 (11)<br><br>Level II     | (1) To investigate if<br>there are possible sex<br>diff in relation to<br>outcome following<br>closed sev TBI in<br>predominately Asian<br>population<br>(2) Prospective<br>cohort study<br>(3) Neurosurgical<br>ICU<br>(4) IC: sev TBI,<br>admitted btwn April<br>1999- December<br>2004<br>EC: N.R | (1) N= 672<br>(2) N/A<br>(3) Age ( <b>M;F</b> ): 43.0±18.6;<br>53.7±22.8<br>(4) Sex: 78.1%<br>(5) TSI: 6mos post-inj<br>(6) IS: sev TBI<br>(7) N/A<br>(8) N.R                                                                          | (1) Two-sample<br>t-test<br>LRM<br>(2) P< 0.05                      | (1) Sex, Age, MI,<br>Pupil abnormality<br>& GCS score-PR<br>(2) N.R                                                             | (1) Mortality & Functional<br>Outcome<br>(2) Medical records &<br>GOS<br>(3) Frequency of Mortality<br>(M;F): 73.75% (177/240);<br>26.25% (63/240)<br>Total: 35.7% (240/672)<br><br>Frequency of Poor<br>Outcome (M;F): 70.9%<br>(73/103); 29.1% (30/103)<br>Total: 15.3% (103/432)<br><br>Frequency of Good<br>Outcome (M;F): 83.6%<br>(275/329); 16.4% (54/329)<br>Total: 48.9% (329/ 432) | Sex NS predictor<br>when variables<br>(presence of multiple<br>injuries, PR pupil<br>abnormalities &<br>GCS) were<br>controlled for<br><br>F ≤ 60 y.o were SS<br>more likely to have a<br>poorer outcome even<br>after controlling for<br>variables<br>*unsure how much<br>detail to go into<br>about age, GCS |

|                                                                                   |                                                                                                                                                                                                                                                                                                                                   |                                                                                                                                                                                                                                                                                                                                                                                                                                     |                                                                                                                                                              |                                                                                                     |                                                                                                                                                                                                                                                                                                  |                                                                                                                                                                                                                                                                                                                  |
|-----------------------------------------------------------------------------------|-----------------------------------------------------------------------------------------------------------------------------------------------------------------------------------------------------------------------------------------------------------------------------------------------------------------------------------|-------------------------------------------------------------------------------------------------------------------------------------------------------------------------------------------------------------------------------------------------------------------------------------------------------------------------------------------------------------------------------------------------------------------------------------|--------------------------------------------------------------------------------------------------------------------------------------------------------------|-----------------------------------------------------------------------------------------------------|--------------------------------------------------------------------------------------------------------------------------------------------------------------------------------------------------------------------------------------------------------------------------------------------------|------------------------------------------------------------------------------------------------------------------------------------------------------------------------------------------------------------------------------------------------------------------------------------------------------------------|
| <p>Ostberg et al. (2014)</p> <p>Finland</p> <p>0.056 (8)</p> <p>Level IV</p>      | <p>(1) To investigate whether smoking is assoc w/ outcome from TBI</p> <p>(2) Cross sectional comparative study</p> <p>(3) Neurological outpt clinic of university hospital</p> <p>(4) IC: info about severity of inj (GCS or PTA), age <math>\geq 15</math> y.o</p> <p>EC: uncertain TBI Dx, non-traumatic Neurological D/Os</p> | <p>(1) N= 689 (295=smokers; 392= non-smokers)</p> <p>(2) N/A</p> <p>(3) Age (at TBI): <math>39.8 \pm 14.9</math></p> <p>Age (at survey): <math>49.1 \pm 15.1</math></p> <p>(4) Sex: 65.3%</p> <p>(5) TSI: <math>9.3 \pm 8.4</math> yrs</p> <p>(6) IS: GCS- Mild: 27.5% Mod: 26.3% Sev: 21.0%</p> <p>PTA- Mild: 37.5% Mod: 26.3% Sev: 23.8% Very Sev: 12.4%</p> <p>(7) N/A</p> <p>(8) Education (yrs): <math>12.2 \pm 3.7</math></p> | <p>(1) T test</p> <p>Chi-square test</p> <p>Fischer's exact test</p> <p>ANOVA</p> <p>Kruskal-Wallis test</p> <p>MLRM</p> <p>(2) <math>P &lt; 0.05</math></p> | <p>(1) PTA, Age, Education, Smoking &amp; Sex</p> <p>(2) N.R</p>                                    | <p>(1) Overall Functional outcome following TBI based on GOS-E (smokers vs non-smokers)</p> <p>(2) Questionnaire &amp; GOSE-E</p> <p>(3) Frequency of Smokers (M;F): 75.9% (224/295); 24.1% (71/295)</p> <p>Frequency of Non-smokers (M;F): 57.1% (224/392); 42.9% (168/392)</p>                 | <p>Age at TBI 41-55, 18-25 comparison SS predictor only for PTA sev cohort</p> <p>Sex NS predictor at any PTA level</p>                                                                                                                                                                                          |
| <p>Ponsford et al. (2007)</p> <p>Australia</p> <p>0.120 (24)</p> <p>Level III</p> | <p>(1) To compare 6mo survival &amp; functional outcome in M vs W in a cohort of pts w/ sev</p> <p>TBI &amp; Hypotension</p> <p>(2) Retrospective comparative study; secondary analyses of RCT data</p> <p>(3) 12 hospitals</p> <p>(4) IC: Sustained blunt head trauma, any stage during prehospital care,</p>                    | <p>(1) N= 229</p> <p>(2) N/A</p> <p>(3) Age (M; F): <math>33.8 \pm 16.3</math>; <math>43.3 \pm 23.1</math></p> <p>(4) Sex: 65.9%</p> <p>(5) TSI: 6mos post-inj</p> <p>(6) IS: sev TBI</p> <p>(7) N/A</p> <p>(8) N.R</p>                                                                                                                                                                                                             | <p>(1) Mann-Whitney U test</p> <p>Student's t-test</p> <p>MLRM</p> <p>Post hoc Analyses</p> <p>(2) <math>P &lt; 0.05</math></p>                              | <p>(1) Sex, Age, GCS at accident scene, Inj type, &amp; Use of hypertonic saline</p> <p>(2) N.R</p> | <p>(1) Survival &amp; Functional outcome</p> <p>(2) Medical records &amp; GOS-E</p> <p>(3) Pt Outcomes (M;F): ED- SBP (mmHg): 120 (95-140); 115 (84-130) GCS: 3 (3-3); 3 (3-3) Survival: 86%; 77%</p> <p>ICU- Serum sodium conc (mmol/L): <math>145 \pm 4.6</math>; <math>146 \pm 5.8</math></p> | <p>After controlling for GCS, Age &amp; Cause of injury, F SS <math>\downarrow</math> rate of survival &amp; good outcome at 6mos- appeared to reflect the <math>\downarrow</math> rate of initial survival- those F surviving had similar outcomes to M</p> <p>Sex SS effect on survival &amp; good outcome</p> |



|                                                                          |                                                                                                                                                                                                                                                                                                                 |                                                                                                                                                                                                                                                       |                                                                                        |                                                                                   |                                                                                                                                                                                                                                                                                                                                                                                                                                                                                                                                                          |                                                                                                                                                                                                                      |
|--------------------------------------------------------------------------|-----------------------------------------------------------------------------------------------------------------------------------------------------------------------------------------------------------------------------------------------------------------------------------------------------------------|-------------------------------------------------------------------------------------------------------------------------------------------------------------------------------------------------------------------------------------------------------|----------------------------------------------------------------------------------------|-----------------------------------------------------------------------------------|----------------------------------------------------------------------------------------------------------------------------------------------------------------------------------------------------------------------------------------------------------------------------------------------------------------------------------------------------------------------------------------------------------------------------------------------------------------------------------------------------------------------------------------------------------|----------------------------------------------------------------------------------------------------------------------------------------------------------------------------------------------------------------------|
|                                                                          | GCS <9,<br>Hypotension<br>(SBP<100 mmHg),<br>≥18 y.o<br>EC: Penetrating<br>trauma, pregnant, no<br>intravenous access,<br>serious premorbid<br>Dx identified on a<br>medical bracelet,<br>peripheral oedema,<br>in close proximity to<br>the receiving<br>hospital, absent sinus<br>rhythm or cardiac<br>arrest |                                                                                                                                                                                                                                                       |                                                                                        |                                                                                   | GCS DC: 11 (10-14); 11<br>(10-14)<br>ICP: 13 (8-17); 10 (6-19)<br>CPP: 70±16; 74±17<br>↓ PaO <sub>2</sub> / FiO <sub>2</sub> ratio: 132<br>(73-250); 126 (68-200)<br>Inotropic support (d): 0.5<br>(0-3); 0.8 (0-3)<br>Mechanical ventilation (d):<br>4 (0.5-10); 4 (0.5-10)<br><br>Hospital DC-<br>LOS (d): 13 (1-26); 8 (0.5-<br>20)<br>Survival: 59%; 39%<br>At 6mos-<br>GCS: 15 (15—15); 15 (15-<br>15)<br>GOS-E: 3.4 ±2.4; 2.5±2.1<br>FIM: 110 ±27; 106±31<br>Return to work-<br>Same job: 16%; 3.8%<br>Modified: 14%; 12%<br>Not working: 70%; 85% | Sex-by-age only SS<br>effect for >60                                                                                                                                                                                 |
| Renner et al.<br>(2012)<br><br>Germany<br><br>0.066 (9)<br><br>Level III | (1) To examine the<br>independent assoc of<br>sex w/ IS, clinical<br>course, pituitary<br>dysfunction &<br>outcome after TBI<br>(2) Retrospective<br>comparative study<br>(3) 3 neurological<br>rehab centers<br>(4) IC: mild-sev HI,<br>18–90 y.o                                                              | (1) N= 427<br>(2) N/A<br>(3) Age (W; M): 55.1±18.9;<br>46.4±18.6<br>18-39:20.4%; 38.2%<br>40-59: 34.3%; 34.5%<br>60-90: 45.4%; 27.3%<br>(4) Sex (W;F): 74.7%<br>(5) TSI: N.R<br>(6) IS (W; M):<br>Sev (GCS 3-8): 69.6%;<br>Mod (GCS 9-12): 13%; 13.6% | (1) Wilcoxon<br>rank sum test<br>Fisher exact<br>Chi-square test<br>MLRM<br>(2) P<0.05 | (1) Sex, Age,<br>Severity, Pre-inj<br>living situation &<br>Employment<br>(2) N.R | (1) Functional, Rehab<br>LOS, Pituitary Dz, Living<br>situation & Employment<br>status<br>(2) GOS & Clinical<br>assessment<br>(3) Frequency of GOS (W;<br>M):<br>GOS II: 10.4%; 5.6%<br>GOS III: 21.9%; 21.5%<br>GOS IV: 45.8%; 40.3%<br>GOS V: 21.9%; 32.6%                                                                                                                                                                                                                                                                                             | Sex NS predictive<br>factor of course &<br>outcome of TBI<br><br>Age SS predictor for<br>employment but not<br>for GOS or living<br>situation<br><br>Severity SS for GOS<br>& employment but<br>not living situation |

|  |                                                                                                               |                                                         |  |  |                                                                                                                                                                                                                                                                                                                                                                                                                                                                                                                                                                                                                                                                                                                                  |  |
|--|---------------------------------------------------------------------------------------------------------------|---------------------------------------------------------|--|--|----------------------------------------------------------------------------------------------------------------------------------------------------------------------------------------------------------------------------------------------------------------------------------------------------------------------------------------------------------------------------------------------------------------------------------------------------------------------------------------------------------------------------------------------------------------------------------------------------------------------------------------------------------------------------------------------------------------------------------|--|
|  | EC: sev liver, heart & kidney Dx,<br>Prior HI, Stroke or sign substance and/or alcohol abuse, impending death | Mild (GCS 13-15): 17.4%;<br>19.1%<br>(7) N/A<br>(8) N.R |  |  | Unknown: 0% both<br><br>Rehab LOS in d (W; M)-<br>Mean±SD: 68.7 ±95.7;<br>64.6±64.3<br>Median: 45; 46<br><br>Pituitary insufficiency (F; M)-<br>Corticotroph deficiency:<br>3.7%; 3.1%<br>Gonadotroph deficiency:<br>0.9%; 14.1%<br>Thyreotroph deficiency:<br>6.5%; 3.5%<br>Somatotroph deficiency:<br>2.8%; 4.7%<br>Living situation (W; M)-<br>Lived alone: 7%; 6.8%<br>Lived w/ partner: 30%;<br>29.9%<br>Lived w/ care giver: 19%;<br>18.1%<br>Continuing inpt care: 44%;<br>45.2%<br>Unknown: 0% both<br>Employment status-<br>Employed: 15%; 26.6%<br>Unemployed: 1.7%; 2.9%<br>Student: 5%; 8.2%<br>Homemaker: 10%; 0%<br>Early retirement: 28.3%;<br>28.8%<br>Regular retirement: 40%;<br>33.5%<br>Unknown: 0% for both |  |
|--|---------------------------------------------------------------------------------------------------------------|---------------------------------------------------------|--|--|----------------------------------------------------------------------------------------------------------------------------------------------------------------------------------------------------------------------------------------------------------------------------------------------------------------------------------------------------------------------------------------------------------------------------------------------------------------------------------------------------------------------------------------------------------------------------------------------------------------------------------------------------------------------------------------------------------------------------------|--|

|                                                                            |                                                                                                                                                                                                                                                                                                                                                                                                                  |                                                                                                                                                                                                                                                                 |                                                                                                                         |                                                                                                                                                                         | *% as total numbers varied based on outcome variable                                                                                                                                                                                                              |                                                                                                                                                                                                                                                                   |
|----------------------------------------------------------------------------|------------------------------------------------------------------------------------------------------------------------------------------------------------------------------------------------------------------------------------------------------------------------------------------------------------------------------------------------------------------------------------------------------------------|-----------------------------------------------------------------------------------------------------------------------------------------------------------------------------------------------------------------------------------------------------------------|-------------------------------------------------------------------------------------------------------------------------|-------------------------------------------------------------------------------------------------------------------------------------------------------------------------|-------------------------------------------------------------------------------------------------------------------------------------------------------------------------------------------------------------------------------------------------------------------|-------------------------------------------------------------------------------------------------------------------------------------------------------------------------------------------------------------------------------------------------------------------|
| <p>Saban et al. (2011)</p> <p>USA</p> <p>0.203 (43)</p> <p>Level III</p>   | <p>(1) To compare perceived LS &amp; perceived functional status 1 yr following sev TBI</p> <p>(2) Retrospective comparative study</p> <p>(3) TBIMS national multicenter longitudinal TBI outcomes database</p> <p>(4) IC: 16-50 y.o, enrolled btwn yrs 1998-2008, diagnosed w/ sev TBI, LS data available at 1 yr post-inj, unconscious for at least 28d consecutively but regained consciousness w/in 1 yr</p> | <p>(1) N=287</p> <p>(2) N/A</p> <p>(3) Age (M; W): 27.06±8.97; 26.30±9.49</p> <p>(4) Sex: 71.7%</p> <p>(5) TSI: 1 yr post-inj</p> <p>(6) IS: sev TBI</p> <p>(7) N/A</p> <p>(8) Education (M; W): High school ≤: 58.5%; 41.0% &gt; high school: 25.5%; 38.6%</p> | <p>(1) t tests</p> <p>Chi-square test</p> <p>Multiple ordinary least squares RM</p> <p>(2) <math>P \leq 0.05</math></p> | <p>(1) Sex, Age, Unconsciousness, Race, Family income, Education, Marital status, Cause of inj, ED SBP, Rehab efficiency, 1yr FIM motor, 1yr FIM cog</p> <p>(2) N.R</p> | <p>(1) LS, functional outcome</p> <p>(2) SWLS, FIM</p> <p>(3) Mean Scores: SWLS (M; F): 20.67±7.62; 18.49±7.71</p> <p>FIM motor: (M; F): 4.33±0.315; 4.29±0.407</p> <p>FIM cog (M; F): 3.34±0.237; 3.36±0.223</p> <p>Total FIM (M; F): 4.66±0.251; 4.63±0.295</p> | <p>Sex did not SS influence perceived LS or motor function 1 yr after sev TBI</p> <p>F had SS better cog outcomes compared to M 1 yr after sev TBI</p> <p>Age &amp; Unconscious was a SS predictive factor for SWLS 1 yr but not for motor or cog functioning</p> |
| <p>Takada et al. (2016)</p> <p>Japan</p> <p>0.116 (21)</p> <p>Level IV</p> | <p>(1) To investigate Functional Ability &amp; Social Participation of pts w/ TBI</p> <p>(2) Qualitative study</p> <p>(3) University-based level-1 trauma hospital</p> <p>(4) IC: admitted to the trauma hospital</p>                                                                                                                                                                                            | <p>(1) N=12</p> <p>(2) N/A</p> <p>(3) Age at Inj/Assessment : 1. 19/22; 2. 36/38; 3. 61/65; 4. 39/45; 5. 37/39; 6. 22/23; 7. 27/32; 8. 30/32; 9. 30/34; 10. 33/39; 11. 27/31; 12. 38/42;</p> <p>(4) Sex: 50%; (5) TSI: 1. ~3yrs post-inj 2. ~2 yrs post-inj</p> | <p>(1) N/A</p> <p>(2) N/A</p>                                                                                           | <p>(1) N/A</p> <p>(2) N.R</p>                                                                                                                                           | <p>(1) Occupation status, Psychosocial troubles &amp; Suitability of family support</p> <p>(2) Interviews &amp; Steps for Coding and Theorization method</p> <p>(3) Frequency of Occupation Change: 75% (9/12)</p>                                                | <p>The qualitative results indicated that social participation after a TBI was influenced by the lack of support for each social stage, life Hx before TBI, post-inj cog function &amp;</p>                                                                       |

|                                                                             |                                                                                                                                                                                                                                                                                                                                                                 |                                                                                                                                                                                                                                                                                                                                                                                                                                                               |                                            |                                                                                                                                                         |                                                                                                                                                                                                                |                                                                                                        |
|-----------------------------------------------------------------------------|-----------------------------------------------------------------------------------------------------------------------------------------------------------------------------------------------------------------------------------------------------------------------------------------------------------------------------------------------------------------|---------------------------------------------------------------------------------------------------------------------------------------------------------------------------------------------------------------------------------------------------------------------------------------------------------------------------------------------------------------------------------------------------------------------------------------------------------------|--------------------------------------------|---------------------------------------------------------------------------------------------------------------------------------------------------------|----------------------------------------------------------------------------------------------------------------------------------------------------------------------------------------------------------------|--------------------------------------------------------------------------------------------------------|
|                                                                             | for TBI, defined by ICD-10 classification, received rehab tx during acute phase of inj, 18-65 y.o, TBI sustained >1yr before time of study, Modified Rankin Scale score 0-3 & living in the community<br>EC: sev post-TBI aphasia, pre-existing Hx of cog impairment, psychiatric D/Os, mod physical impairments &/or living outside of the Kanagawa prefecture | 3. ~4 yrs post-inj<br>4. ~6yrs post-inj<br>5. ~2yrs post-inj<br>6. ~1yr post-inj<br>7. ~5yrs post-inj<br>8. ~2yrs post-inj<br>9. ~4yrs post-inj<br>10. ~6yrs post-inj<br>11. ~4yrs post-inj<br>12. ~4yrs post-inj<br>(6) IS:<br>GCS:<br>1. 13; 2. 14; 3. 13; 4. 14; 5. 7;<br>6. 6; 7. 10;<br>8. 3; 9. 6; 10. 8; 11. 14; 12. 8<br>(7) N/A<br>(8) Education (yrs):<br>1. 15; 2. 14; 3. 14; 4. 12; 5. 12;<br>6. 9; 7. 14; 8. 12; 9. 14; 10. 16;<br>11. 16; 12. 9 |                                            |                                                                                                                                                         | Frequency of Psychosocial trouble: 42% (5/12)<br><br>Frequency of Suitability: 17% (2/12)                                                                                                                      | understanding & support from the family                                                                |
| De Koning et al. (2017)<br><br>Netherlands<br><br>0.044 (3)<br><br>Level II | (1) To study return to RTW after mTBI at several intervals after injury and to predict RTW on basis of occupational factors in addition to demographic, personality, & inj-related factors at 6 & 12 mos after inj<br>(2) Prospective cohort study<br>(3) 3 level 1 trauma centers                                                                              | (1) N= 316 (nRTW=50; pRTW=53; cRTW=213)<br>(2) N.R<br>(3) Age (nRTW; pRTW; cRTW): 49.1±11.0; 44.6±13.8; 44.7±12.1<br>(4) Sex (nRTW; pRTW; cRTW): 66%; 47%; 69%<br>(5) TSI: 6mos<br>(6) IS:<br>ISS (nRTW; pRTW; cRTW): 12.2±9.0; 9.8±6.3; 6.7±4.4<br>CT abnormalities (nRTW; pRTW; cRTW): 23%; 25%; 12%                                                                                                                                                        | (1) Post-hoc analyses<br>LRM<br>(2) P<0.05 | (1) Age, Sex, Education level, MVA, ISS excluding head, GCS, Occupational category, Workload (h/wk), HISC (n of complaints), HADS Depression<br>(2) N.R | (1) RTW<br>(2) RTW Questionnaire<br>(3) Frequency of nRTW (M;F): 66% (33/50); 34% (17/50)<br><br>Frequency of pRTW (M;F): 47% (25/53); 53% (28/53)<br><br>Frequency of cRTW (M;F): 69% (147/213); 31% (66/213) | 77% of pts had completely resumed work after 12mos<br><br>Sex, Age & Severity NS for 6mos or 12mos RTW |

|                                                                                 |                                                                                                                                                                                                                                                                                             |                                                                                                                                                                                                                                                                                         |                                                                                              |                                                                           |                                                                                                                                                                                         |                                                                                                                                                                                                                                                                                                                                                    |
|---------------------------------------------------------------------------------|---------------------------------------------------------------------------------------------------------------------------------------------------------------------------------------------------------------------------------------------------------------------------------------------|-----------------------------------------------------------------------------------------------------------------------------------------------------------------------------------------------------------------------------------------------------------------------------------------|----------------------------------------------------------------------------------------------|---------------------------------------------------------------------------|-----------------------------------------------------------------------------------------------------------------------------------------------------------------------------------------|----------------------------------------------------------------------------------------------------------------------------------------------------------------------------------------------------------------------------------------------------------------------------------------------------------------------------------------------------|
|                                                                                 | (4) IC: pts w/ mTBI admitted to emerg EC: previous TBI or psychiatric Dx requiring hospital AD, inability to be F/U, & substance abuse                                                                                                                                                      | GCS score (nRTW; pRTW; cRTW): 14.3±0.8; 14.4±0.6; 14.6±0.6<br>PTA (nRTW; pRTW; cRTW): 84%; 90%; 89%<br>LOC (nRTW; pRTW; cRTW): 80%; 85%; 82%<br>(7) AT:<br>BL: 6mos post-inj (for this study)<br>F/U: 12mos post-inj<br>(8) Median Education (nRTW; pRTW; cRTW): 5(2-7); 5(2-7); 5(2-7) |                                                                                              |                                                                           |                                                                                                                                                                                         |                                                                                                                                                                                                                                                                                                                                                    |
| van der Horn et al. (2013)<br><br>Netherlands<br><br>0.044 (3)<br><br>Level III | (1) To investigate the relation of Postconcussive complaints, Anxiety, & Depression w/ vocational outcome in pts w/ TBI<br>(2) Retrospective comparative study<br>(3) Level 1 trauma center<br>(4) IC: pts w/ TBI admitted to University Medical Centre Gronnigen EC: <15 y.o, previous TBI | (1) N= 242 (51 Minor; 121 Mild; 70 Mod-Sev)<br>(2) N/A<br>(3) Age (Minor, Mild, Mod-Sev): 42.1±16.8; 40.3±17.3; 35.2±18.8<br>(4) Sex(Minor, Mild, Mod-Sev): 61%; 78%; 73%;<br>(5) N.R<br>(6) IS: 51 Minor; 121 Mild; 70 Mod-Sev<br>(7) N/A<br>(8) N.R                                   | (1) Spearman correlation coefficient<br>Chi-square test<br>Binary LRM<br>MLRM<br>(2) P< 0.05 | (1) GCS score, Postconcussive complaints, Anxiety & Depression<br>(2) N.R | (1) RTW<br>(2) RTW Questionnaire<br>(3) Frequency of RTW (Complete RTW reported*):<br>Minor (M;F): 82%; 50%<br>Mild (M;F): 72%; 55%<br>Mod-Sev (M;F): 44%; 47%<br>Total (M;F): 66%; 51% | (1) MLRM:<br>GCS: (OR=1.58; CI 1.17-2.13; P<0.01)<br><br>(2) MLRM: (only SS reported)<br>Postconcussive complaints:<br>(OR=8.45; CI 3.06-23.36; P<.001)<br>Anxiety: (OR=3.44; CI 1.36-8.74; P<0.01)<br>Depression:<br>(OR=3.28; CI 1.17-9.16; P<0.05)<br><br>(3) IS,<br>Postconcussive complaints, Anxiety, & Depression were all SS predictive of |

|                                                                      |                                                                                                                                                                                                                                                                                                                                                                                                                                                                                                                                                                                                             |                                                                                                                                                                                                                  |                                     |                                                                                                                                                                                                                                                          |                                                            |                                                                            |
|----------------------------------------------------------------------|-------------------------------------------------------------------------------------------------------------------------------------------------------------------------------------------------------------------------------------------------------------------------------------------------------------------------------------------------------------------------------------------------------------------------------------------------------------------------------------------------------------------------------------------------------------------------------------------------------------|------------------------------------------------------------------------------------------------------------------------------------------------------------------------------------------------------------------|-------------------------------------|----------------------------------------------------------------------------------------------------------------------------------------------------------------------------------------------------------------------------------------------------------|------------------------------------------------------------|----------------------------------------------------------------------------|
|                                                                      |                                                                                                                                                                                                                                                                                                                                                                                                                                                                                                                                                                                                             |                                                                                                                                                                                                                  |                                     |                                                                                                                                                                                                                                                          |                                                            | RTW (explained variance 45%) when adj for Age & Sex                        |
| Vikane et al. (2016)<br><br>Norway<br><br>0.053 (6)<br><br>Level III | <p>(1) To predict RTW at 12mos for pts who either were sick-listed or were at risk to be sick-listed w/ PCS at 6-8wks after inj</p> <p>(2) Prospective comparative study; secondary analyses of RCT data</p> <p>(3) 2 university hospitals</p> <p>(4) IC: 16-55 y.o, hospitalized acutely at Department of Neurosurgery for mTBI, sick-listed or at risk to be sick-listed w/ persistent PCS</p> <p>EC: current major Psychiatric Dx, head trauma, or other Dxs w impact on work; unemployment last 6mos, not Norwegian language, Dx w/ substance abuse in medical records, or lack of informed consent</p> | <p>(1) N= 151</p> <p>(2) N/A</p> <p>(3) Age: 32 (min=16, max=55)</p> <p>(4) Sex: 61%</p> <p>(5) TSI: 6-8wks post-inj</p> <p>(6) IS: mTBI</p> <p>(7) N/A</p> <p>(8) Education (↑ education &gt;13 years): 43%</p> | <p>(1) LRM</p> <p>(2) P&lt;0.05</p> | <p>(1) Age, Sex, Sick-listed in last yr, Intracranial inj, Postconcussion symptoms, PTSD, Anxiety, Depression, Expectation, Subjective health complaints, Widespread pain, Headache, Neck pain, Back pain, GOS-E, Sick-listed at 2mos</p> <p>(2) N.R</p> | <p>(1) RTW</p> <p>(2) RTW Questionnaire</p> <p>(3) N.R</p> | <p>LRM (fully adj): Sex, Age, or Intracranial inj NS associate wof RTW</p> |

|                                                                                |                                                                                                                                                                                                                                                                                                                                         |                                                                                                                                                                                                                                                                                                                           |                                                                                                                                   |                                                                                                                                                                 |                                                                                                                                                                                     |                                                                                                                                                                                                                                                                                                                                                                                                                                              |
|--------------------------------------------------------------------------------|-----------------------------------------------------------------------------------------------------------------------------------------------------------------------------------------------------------------------------------------------------------------------------------------------------------------------------------------|---------------------------------------------------------------------------------------------------------------------------------------------------------------------------------------------------------------------------------------------------------------------------------------------------------------------------|-----------------------------------------------------------------------------------------------------------------------------------|-----------------------------------------------------------------------------------------------------------------------------------------------------------------|-------------------------------------------------------------------------------------------------------------------------------------------------------------------------------------|----------------------------------------------------------------------------------------------------------------------------------------------------------------------------------------------------------------------------------------------------------------------------------------------------------------------------------------------------------------------------------------------------------------------------------------------|
| <p>Gutman et al. (1995)</p> <p>USA</p> <p>0.203 (43)</p> <p>Level IV</p>       | <p>(1) To explore the disruption of gender identity &amp; sex role as a result of TBI</p> <p>(2) Case series</p> <p>(3) Residential facility</p> <p>(4) IC: be own legal guardian, sustained HI btwn ages 18-30, be at least 1 yr post inj, cog level high enough to understand &amp; articulate interview questions</p> <p>EC: N.R</p> | <p>(1) N=4</p> <p>(2) N/A</p> <p>(3) Age:</p> <p>Pt 1: 46</p> <p>Pt 2: 33</p> <p>Pt 3: 36</p> <p>Pt 4: 46</p> <p>(4) Sex: 50%</p> <p>(5) TSI:</p> <p>Pt 1: 18 yrs post-inj</p> <p>Pt 2: 12 yrs post-inj</p> <p>Pt 3: 10 yrs post-inj</p> <p>Pt 4: 16 yrs post-inj</p> <p>(6) N.R</p> <p>(7) N/A</p> <p>(8) N.R</p>        | <p>(1) Grounded theory</p> <p>Constant comparative analysis</p> <p>Triangulation</p> <p>Negative case analysis</p> <p>(2) N/A</p> | <p>(1) N/A</p> <p>(2) Med Intake:</p> <p>*Mentions Pt 3 &amp; 4 maintained medical care post-inj</p>                                                            | <p>(1) Perceived masculinity/femininity, Intimate relationships, Gender roles &amp; Activities that support gender roles</p> <p>(2) Interview</p> <p>(3) N/A</p>                    | <p>M expressed ↑ feelings of sex inadequacy post-inj than F &amp; ↑ diff resolving rites of passage &amp; developmental issues characteristic of the life stage at which they experienced their inj</p> <p>M depended more heavily on traditional sex-specific activities before &amp; after inj to define and support sex role; F relied more on cross-sex activities</p> <p>F able to maintain more pre-inj activities post-inj than M</p> |
| <p>Mollayeva et al. (2019)</p> <p>Canada</p> <p>0.203 (43)</p> <p>Level IV</p> | <p>(1) To explore knowledge of sex and gender, and their influences in TBI recovery</p> <p>(2) Case series</p> <p>(3) Rehabilitation</p> <p>(4) IC: adult men &amp; women at acute and chronic phases of injury, mild or mod-</p>                                                                                                       | <p>(1) N=40</p> <p>(2) N/A</p> <p>(3) Age: Acute phase- M: <math>48.6 \pm 19.9</math>; W: <math>42.9 \pm 22.7</math>; Chronic- M: <math>50.8 \pm 14</math>; <math>44.1 \pm 16.8</math>.</p> <p>(4) Sex: 45%</p> <p>(5) TSI: M : Acute phase (n=12); chronic phase (n=10); W : Acute phase (n=8), chronic phase (n=10)</p> | <p>(1) Applied thematic analyses; comparative analysis</p> <p>Triangulation</p> <p>Negative case analysis</p> <p>(2) N/A</p>      | <p>(1) Age, ethnicity, education, level of femininity/masculinity, TBI severity, marital status, impairments mostly cognitive/physical/ both</p> <p>(2) N/R</p> | <p>(1) Knowledge of sex and gender effects in TBI; understanding roles &amp; responsibilities' change from pre- to post TBI</p> <p>(2) Semi-structured interview</p> <p>(3) N/A</p> | <p>W: Declarative knowledge better than in M</p> <p>M &amp; F: Procedural knowledge equal</p> <p>Roles &amp; responsibilities of M&amp;F are gendered</p>                                                                                                                                                                                                                                                                                    |

|                                                                       |                                                                                                                                                                                                                  |                                                                                                                                                                                                                                                                                                                                                                |                              |                                                                                                                 |                               |                                                                                                                                                                                                                                                                                                                           |
|-----------------------------------------------------------------------|------------------------------------------------------------------------------------------------------------------------------------------------------------------------------------------------------------------|----------------------------------------------------------------------------------------------------------------------------------------------------------------------------------------------------------------------------------------------------------------------------------------------------------------------------------------------------------------|------------------------------|-----------------------------------------------------------------------------------------------------------------|-------------------------------|---------------------------------------------------------------------------------------------------------------------------------------------------------------------------------------------------------------------------------------------------------------------------------------------------------------------------|
|                                                                       | severe TBI, able to understand & articulate interview questions<br>EC: pts who did not sign informed consent                                                                                                     | (6) M: mild (n=9); mod-severe (n=12); W: mild (n=11); mod-severe (n=7)<br>(7) N/A<br>(8) High school or less: M (n=6); W (n=4); college, university (bachelor degree): M (n=10); W (n=10), above bachelor degree                                                                                                                                               |                              |                                                                                                                 |                               | Pre-disability gendered roles & responsibilities disturbed in both M&F<br><br>New roles not formed yet; many roles and responsibilities taken on by significant others<br><br>M: feel demasculated<br>F: feel quilt<br><br>Both M & F dependent on others<br><br>Age, ethnicity, injury severity link to dependence level |
| Williamson et al (2016)<br><br>USA<br><br>0.203 (43)<br><br>Level III | (1) To investigate the influence of race, sex, functional ability & an array of pre-inj, inj-related & sociodemographic variables on LS over 10yrs following mod- sev TBI<br>(2) Retrospective comparative study | (1) N= 3157<br>(2) N.R<br>(3) Age: $35.87 \pm 16.14$<br>(4) Sex: 70.5%<br>(5) TSI: 1yr post-inj<br>(6) IS: mod-sev TBI<br>GCS: $8.97 \pm 4.46$<br>D of PTA: $23.89 \pm 21.86$<br>(7) AT:<br>BL: 1 yr post-inj<br>t <sub>1</sub> : 2 yrs post-inj<br>t <sub>2</sub> : 5 yrs post-inj<br>t <sub>3</sub> : 10 yrs post-inj<br>(8) Education: $12.83 \pm 4.03$ yrs | (1) HLM<br>(2) $P \leq 0.05$ | (1) Time, Sex, Race, FIM, PTA, GCS, Rehab LOS, Education, Earnings, WEPCE, Age & Relationship status<br>(2) N.R | (1) LS<br>(2) SWLS<br>(3) N.R | LS trajectories NS effected by sex, PTA duration, GCS or by the interaction of sex-by-time.<br><br>Age at inj was a SS predictor of outcome                                                                                                                                                                               |



|                                                                                    |                                                                                                                                                                                                                                                                                                                                                                                                                                     |                                                                                                                                                                                           |                                                 |                                                                                   |                                                                                        |                                                                                                                                                                                                                      |
|------------------------------------------------------------------------------------|-------------------------------------------------------------------------------------------------------------------------------------------------------------------------------------------------------------------------------------------------------------------------------------------------------------------------------------------------------------------------------------------------------------------------------------|-------------------------------------------------------------------------------------------------------------------------------------------------------------------------------------------|-------------------------------------------------|-----------------------------------------------------------------------------------|----------------------------------------------------------------------------------------|----------------------------------------------------------------------------------------------------------------------------------------------------------------------------------------------------------------------|
|                                                                                    | <p>(3) 16 level 1 trauma centers, part of TBIMS database</p> <p>(4) IC: mod-sev TBI classification based on intracranial neuroimaging, GCS &lt;13, LOC &gt; 30mins, PTA &gt;24h, at least 16 y.o, AD w/in 72h of inj to emerg, consecutive receipt of acute care &amp; inpt rehab services, informed consent</p> <p>EC: GCS &lt;13 due to intoxication, intubation, or sedation; LOC&gt;30 mins due to intoxication or sedation</p> |                                                                                                                                                                                           |                                                 |                                                                                   |                                                                                        |                                                                                                                                                                                                                      |
| <p>Shonberger et al. (2009)</p> <p>Australia</p> <p>0.120 (24)</p> <p>Level IV</p> | <p>(1) To investigate the assoc btwn age, IS, &amp; brain lesion volumes, as well as viable brain volumes, following TBI</p> <p>(2) Case series</p> <p>(3) Hospital</p> <p>(4) IC: sustainability for MRI scanning,</p>                                                                                                                                                                                                             | <p>(1) N=98</p> <p>(2) 1% ?</p> <p>(3) Age: 34.5±14.0</p> <p>(4) Sex: 75.5%</p> <p>(5) TSI: 2.3±1.5 yrs post-inj</p> <p>(6) IS: sev TBI</p> <p>(7) N/A</p> <p>(8) Education: 12.4±2.5</p> | <p>(1) LRM</p> <p>MRM</p> <p>(2) P&lt; 0.05</p> | <p>(1) Sex, Accident type, Age, Time from inj to MRI &amp; PTA</p> <p>(2) N.R</p> | <p>(1) Viable Grey Matter &amp; White Matter volumes</p> <p>(2) MRI</p> <p>(3) N.R</p> | <p>Older age was assoc w/ ↓ viable Grey Matter volumes in most neo-cortical brain regions (except Whole brain, Limbic &amp; Brainstem) &amp; NS for White Matter volumes</p> <p>Longer PTA was assoc w/ ↓ viable</p> |

|                                                                           |                                                                                                                                                                                                                                                                                                                                                                                                                               |                                                                                                                                                                                                                                                                                                                                 |                                                                                                                                                                                                            |                                                            |                                                                                                                                                                                                                                                                                                                                                                                                                                                                                                                                                                                                |                                                                                                                                                                                                                                                                                                                                                |
|---------------------------------------------------------------------------|-------------------------------------------------------------------------------------------------------------------------------------------------------------------------------------------------------------------------------------------------------------------------------------------------------------------------------------------------------------------------------------------------------------------------------|---------------------------------------------------------------------------------------------------------------------------------------------------------------------------------------------------------------------------------------------------------------------------------------------------------------------------------|------------------------------------------------------------------------------------------------------------------------------------------------------------------------------------------------------------|------------------------------------------------------------|------------------------------------------------------------------------------------------------------------------------------------------------------------------------------------------------------------------------------------------------------------------------------------------------------------------------------------------------------------------------------------------------------------------------------------------------------------------------------------------------------------------------------------------------------------------------------------------------|------------------------------------------------------------------------------------------------------------------------------------------------------------------------------------------------------------------------------------------------------------------------------------------------------------------------------------------------|
|                                                                           | absence of neurological D/Os other than TBI<br>EC: N.R                                                                                                                                                                                                                                                                                                                                                                        |                                                                                                                                                                                                                                                                                                                                 |                                                                                                                                                                                                            |                                                            |                                                                                                                                                                                                                                                                                                                                                                                                                                                                                                                                                                                                | <p>White Matter volumes in most brain regions (except Occipital &amp; Cerebellum) &amp; only SS in Sublobar region of Grey Matter</p> <p>Sex was NS predictive factor of all regions of White matter &amp; all regions of Grey matter</p>                                                                                                      |
| <p>Wagner et al. (2004)</p> <p>USA</p> <p>0.203 (43)</p> <p>Level III</p> | <p>(1) To determine if the relationship btwn CSF markers of excitotoxicity, ischemia, &amp; oxidative damage are sex &amp; age specific &amp; the role of hypothermia in affecting these relationships</p> <p>(2) Retrospective comparative study</p> <p>(3) Level 1 trauma center</p> <p>(4) IC: For 48 h of mod Hypothermia tx: 16-65 y.o, initial GCS score <math>\leq 8</math>, (+) CT scan for TBI based on Marshall</p> | <p>(1) N= 68 (39 received hypothermia tx)</p> <p>(2) N/A</p> <p>(3) Age (M;F): 31.4; 31.7</p> <p>(4) Sex (hypothermia; normothermia): 53.85%; 46.15%</p> <p>(5) TSI: 1d post-inj</p> <p>(6) IS: GCS (M;F): 6; 5</p> <p>(7) AT: BL: 1d post-inj<br/>t<sub>1</sub>: 2d post-inj<br/>t<sub>2</sub>: 3d post-inj</p> <p>(8) N.R</p> | <p>(1) Levene's test</p> <p>Logarithmic data transformation</p> <p>Student's t test</p> <p>Chi-square test</p> <p>Fisher's exact test</p> <p>Repeated measures multivariate model</p> <p>(2) P&lt;0.05</p> | <p>(1) Age, Time, Sex &amp; Hypothermia</p> <p>(2) N.R</p> | <p>(1) CSF Isoprostane/ Glutamate ratios &amp; Isoprostane/Lactate/Pyruvate ratios</p> <p>(2) Commercial enzyme immunoassay kit</p> <p>(3) F2-isoprostane/glutamate ratios (M;F):<br/>D1= 47.1<math>\pm</math>12.5; 42.2<math>\pm</math>19.3<br/>D2: 63.9<math>\pm</math>20.4; 19.8<math>\pm</math>4.7<br/>D3: 78.5<math>\pm</math>25.2; 11.4<math>\pm</math>3.5</p> <p>F2-isoprostane/lactate/pyruvate ratios (M;F):<br/>D1: 4.6<math>\pm</math>0.9; 3.3<math>\pm</math>0.7<br/>D2: 2.7<math>\pm</math>0.7; 1.5<math>\pm</math>0.4<br/>D3: 3.1<math>\pm</math>0.6; 0.8<math>\pm</math>0.1</p> | <p>SS sex effect &amp; sex*time interaction on F2 isoprostane/glutamate ratios &amp; / F2-isoprostane/lactate/pyruvate</p> <p>Age SS <math>\uparrow</math> isoprostane/glutamate ratios</p> <p>F had a sign inverse relationship btwn D1 isoprostane/ glutamate ratios &amp; GOS &amp; isoprostane/lactate/pyruvate ratio &amp; GOS scores</p> |

|                                                                    |                                                                                                                                                                                                                                                                                                                                               |                                                                                                                                                                                                                                                                                                                                                                           |                                                                                                                                                                     |                                                          |                                                                                                                                  |                                                                                                                                                                                                                                                         |
|--------------------------------------------------------------------|-----------------------------------------------------------------------------------------------------------------------------------------------------------------------------------------------------------------------------------------------------------------------------------------------------------------------------------------------|---------------------------------------------------------------------------------------------------------------------------------------------------------------------------------------------------------------------------------------------------------------------------------------------------------------------------------------------------------------------------|---------------------------------------------------------------------------------------------------------------------------------------------------------------------|----------------------------------------------------------|----------------------------------------------------------------------------------------------------------------------------------|---------------------------------------------------------------------------------------------------------------------------------------------------------------------------------------------------------------------------------------------------------|
|                                                                    | classification method, placement of an external ventricular drain for standard of care ICP monitoring, signed consent from next-of-kin<br>IC: For 24 h of hypothermia tx: GCS score of 5-8, <46 y.o<br>IC: For CSF collection- admitted to level 1 trauma center w/ sev TBI<br>EC: N.R                                                        |                                                                                                                                                                                                                                                                                                                                                                           |                                                                                                                                                                     |                                                          |                                                                                                                                  |                                                                                                                                                                                                                                                         |
| Wagner et al. (2007)<br><br>USA<br><br>0.203 (43)<br><br>Level III | (1) To determine assoc btwn factors that affect DAT expression & CSF DA & metabolite levels after sev TBI<br>(2) Retrospective comparative study<br>(3) Level 1 trauma center<br>(4) IC: For 48 h of mod Hypothermia tx: 16-70 y.o, initial GCS score $\leq 8$ , (+) CT scan for TBI, placement of an external ventricular drain for standard | (1) N=63 (28= hypothermia tx; 35= normothermia)<br>(2) Attrition: 23.1%<br>(3) Age ( <b>M;F</b> ): $31.42 \pm 2.04$ ; $31.73 \pm 3.99$<br>(4) Sex: 76.2%<br>(5) TSI: 1d post-inj<br>(6) IS: sev TBI<br>(7) AT: BL: 1d post-inj<br>t <sub>1</sub> : 2d post-inj<br>t <sub>2</sub> : 3d post-inj<br>t <sub>3</sub> : 4d post-inj<br>t <sub>4</sub> : 5d post-inj<br>(8) N.R | (1) Student t test<br>Chi-square test<br>Fisher exact test<br>Logarithmic data transformation<br>Univariate & multivariate mixed-effects model<br>(2) $P \leq 0.05$ | (1) Age, GCS, Time, Sex, tx, group & Inotrope<br>(2) N.R | (1) CSF DA, DOPAC, & HVA levels<br>(2) Sterile port of external ventricular drain & Electrochemical detection methods<br>(3) N.R | Log (DA) SS predictors of outcome: Sex*<br>Group; Sex, Age & GCS NS<br>Log (DOPAC) predictive factor of outcome: Sex; Age & GCS NS<br><br>Log (HAV) Age, Sex & GCS NS predictors of outcome<br>Log (DOPAC/DA) GCS SS predictor of outcome; Age & Sex NS |

|                                                                   |                                                                                                                                                                                                                                                                                                                                                               |                                                                                                                                                                                  |                                                                                                                          |                    |                                                                                                                                                                                                                                                                                                            |                                                                                          |
|-------------------------------------------------------------------|---------------------------------------------------------------------------------------------------------------------------------------------------------------------------------------------------------------------------------------------------------------------------------------------------------------------------------------------------------------|----------------------------------------------------------------------------------------------------------------------------------------------------------------------------------|--------------------------------------------------------------------------------------------------------------------------|--------------------|------------------------------------------------------------------------------------------------------------------------------------------------------------------------------------------------------------------------------------------------------------------------------------------------------------|------------------------------------------------------------------------------------------|
|                                                                   | of care ICP monitoring, signed consent from next-of-kin<br>IC: For 24 h of hypothermia tx: GCS score of 5-8, <46 y.o, CT studies (+) for TBI, placement of external ventricular drain for ICP monitoring                                                                                                                                                      |                                                                                                                                                                                  |                                                                                                                          |                    |                                                                                                                                                                                                                                                                                                            | Log (HVA/DA) GCS predictive factor of outcome; Age & Sex NS                              |
| Wang et al. (2018)<br><br>China<br><br>0.152 (36)<br><br>Level IV | (1) To estimate the role of sex in intrinsic functional connectivity after acute TBI<br>(2) Case series<br>(3) ED at local hospital<br>(4) IC: mTBI pts w/ GCS 13-15, LOC <30 min, PTA ≤24h, other transient neurological abnormalities & intracranial lesion not requiring surgery, ≥18 y.o<br>EC: Hx of previous brain inj, neurological D/O, long-standing | (1) N=54 (27 M; 27 W)<br>(2) N/A<br>(3) Age (M;F) (35.4±9.7; 35.6±9.4)<br>(4) Sex : 50%<br>(5) N.R<br>(6) IS : mTBI<br>(7) N.A<br>(8) Education in yrs (M; W) : 9.4±3.5; 9.5±4.3 | (1)Shapiro-Wilk test<br>2 sample t-test<br>Mann-Whitney test<br>Kruskal-Wallis test<br>Chi-square<br>ANOVA<br>(2) P<0.05 | (1) Sex<br>(2) N.R | (1) Abnormal intrinsic functional connectivity within resting-state networks<br><br>(2) Clinical assessments-neuroimaging, neuropsychological tests (RPCS, DSC, VF, ISI)<br><br>(3) Score (M;F)<br>RPCS: 8.4±5.8; 11.4±6.4<br>DSC: 34.7±13.7; 36.7±14.1<br>VF: 17.1±4.8; 15.6±4.8<br>ISI: 5.9±4.5; 8.8±7.1 | SS sex diff in motor, executive functional, ventral stream, cerebellum & visual networks |

|                                                         |                                                                                                                                                                                                                                                                                     |                                                                                                                                                                                                                                                                                                     |                                                                          |                                                                                                                                                                                                                                           |                                                                                                                                                                                      |                                                                                                                                                                                                                                                                                                        |
|---------------------------------------------------------|-------------------------------------------------------------------------------------------------------------------------------------------------------------------------------------------------------------------------------------------------------------------------------------|-----------------------------------------------------------------------------------------------------------------------------------------------------------------------------------------------------------------------------------------------------------------------------------------------------|--------------------------------------------------------------------------|-------------------------------------------------------------------------------------------------------------------------------------------------------------------------------------------------------------------------------------------|--------------------------------------------------------------------------------------------------------------------------------------------------------------------------------------|--------------------------------------------------------------------------------------------------------------------------------------------------------------------------------------------------------------------------------------------------------------------------------------------------------|
|                                                         | psychiatric D/O, or concurrent substance or alcohol abuse, structural abnormality neuroimaging, intubation and/or presence of a skull fracture & sedatives, medication effect, other (psychological trauma, language barrier, or coexisting medical D/Os, caused by penetrating inj |                                                                                                                                                                                                                                                                                                     |                                                                          |                                                                                                                                                                                                                                           |                                                                                                                                                                                      |                                                                                                                                                                                                                                                                                                        |
| Albrecht et al. (2016)<br>USA<br>0.203 (43)<br>Level II | (1) To determine if there are sex diff in Mortality following isolated TBI in older adults & compare to findings using all TBI<br>(2) Retrospective cohort study<br>(3) Level 1 trauma center<br>(4) IC: $\geq 65$ y.o, Dx of TBI<br>EC: N.R                                        | (1) N= 1320 Isolated TBI; 1320 All TBI<br>(2) N/A<br>(3) Age of Isolated TBI(M;F):<br>65-74: 41%; 32%<br>75-84: 42%; 43%<br>>85: 18%; 25%<br>Age of All TBI: N.R<br>(4) Sex (Isolated TBI; All TBI):<br>55.3%; 58%<br>(5) N.R<br>(6) IS:<br>GCS All TBI (M;F)-<br>14-15: 68%; 71%<br>9-13: 14%; 14% | (1) Chi-square test<br>Student's t test<br>Stepwise RM<br>(2) $P < 0.05$ | (1) Sex, Age, AIS head score, GCS, Race, Cardiac arrhythmia, AD SBP, Transport to trauma center, ISS, Severity of other inj, AIS face score, AIS spine score, AIS thorax score, AIS abdominal score, AIS upper extremity score<br>(2) N.R | (1) Mortality<br>(2) Medical records<br>(3) Frequency of Mortality of Isolated TBI pts at DC (M;F): 17% (123/730); 16% (96/590)<br><br>Frequency of Mortality for All TBI group: N.R | Sex (W) was not SS assoc w/ $\downarrow$ odds of mortality in Isolated TBI vs All TBI group, sex (F) was SS assoc w/ $\downarrow$ odd of mortality<br><br>Age was SS predictor of outcome in Isolated TBI & All TBI cases<br><br>AIS 3,4, $\geq 5$ SS in Isolated TBI; AIS $\geq 5$ only SS in All TBI |

|                                                                   |                                                                                                                                                                                                                                                                                                                                                                                  |                                                                                                                                                                                                                                                                                        |                                                             |                                                                                             |                                                                                      |                                                                                                                                                                                                                                                                                                                                |
|-------------------------------------------------------------------|----------------------------------------------------------------------------------------------------------------------------------------------------------------------------------------------------------------------------------------------------------------------------------------------------------------------------------------------------------------------------------|----------------------------------------------------------------------------------------------------------------------------------------------------------------------------------------------------------------------------------------------------------------------------------------|-------------------------------------------------------------|---------------------------------------------------------------------------------------------|--------------------------------------------------------------------------------------|--------------------------------------------------------------------------------------------------------------------------------------------------------------------------------------------------------------------------------------------------------------------------------------------------------------------------------|
|                                                                   |                                                                                                                                                                                                                                                                                                                                                                                  | 3-8: 18%; 15%<br>GCS Isolated TBI (M;F):<br><9: 18%; 15%<br><br>AIS head (M;F)-<br>1: 20%; 20%<br>2: 2%; 4%<br>3: 10%; 13%<br>4: 42%; 38%<br>≥5: 27%; 25%<br>AIS head Isolated TBI (M;F):<br>3.5±1.4; 3.4±1.4<br>(7) N/A<br>(8) N.R                                                    |                                                             |                                                                                             |                                                                                      | All GCS scores SS in both groups<br><br>ISS SS in All TBI group                                                                                                                                                                                                                                                                |
| Berry et al. (2009)<br><br>USA<br><br>0.203 (43)<br><br>Level III | (1) To determine whether sex or menopausal status affects mortality in pts w/ mod-sev TBI<br>(2) Retrospective comparative study<br>(3) National Trauma Data Bank<br>(4) IC: isolated mod-sev TBI<br>EC: ≤13 y.o, dead on arrival, dead w/in 24 h, transferred out to another facility, admitted w/ a burn Dx, head AIS>5, & had any missing data including age, sex, & head AIS | (1) N= 72, 294<br>(2) N/A<br>(3) Age: 44.6±21.8<br>14-20: 15.0%<br>21-45: 39.7%<br>46-55: 13.1%<br>56-65: 8.8%<br>66-75: 8.0%<br>76-89: 13.1%<br>>89: 2.3%<br>(4) Sex: 69.2%<br>(5) N.R<br>(6) IS:<br>GCS in ED: 11.1±4.9<br>ISS: 21.7 ±9.7<br>Head AIS: 3.8±0.7<br>(7) N/A<br>(8) N.R | (1) Wilcoxon's test<br>Chi-square test<br>LRM<br>(2) P<0.05 | (1) Head AIS, Age group, Any complication, SBP, Inj mode, ISS, Comorbidity & Sex<br>(2) N.R | (1) Mortality<br>(2) Medical records<br>(3) Frequency of mortality (M;F): 9.2%; 9.4% | Head AIS, all age groups, sex & ISS were all SS predictors of outcome<br><br>F SS ↓ Mortality risk than M after adjust for confoundes<br>After age stratification, perimenopausal W (46–55 years) & postmenopausal W (≥ 55) showed a SS ↓ risk in mortality<br><br>No diff in Mortality in premenopausal F compared w/ their M |

|                                                                            |                                                                                                                                                                                                                                                                                                                                         |                                                                                                                                                                                                     |                                                                                                                          |                                                                                                                                                                                                                 |                                                                                                                                                                                                                                                                                                   |                                                                                                                                       |
|----------------------------------------------------------------------------|-----------------------------------------------------------------------------------------------------------------------------------------------------------------------------------------------------------------------------------------------------------------------------------------------------------------------------------------|-----------------------------------------------------------------------------------------------------------------------------------------------------------------------------------------------------|--------------------------------------------------------------------------------------------------------------------------|-----------------------------------------------------------------------------------------------------------------------------------------------------------------------------------------------------------------|---------------------------------------------------------------------------------------------------------------------------------------------------------------------------------------------------------------------------------------------------------------------------------------------------|---------------------------------------------------------------------------------------------------------------------------------------|
|                                                                            |                                                                                                                                                                                                                                                                                                                                         |                                                                                                                                                                                                     |                                                                                                                          |                                                                                                                                                                                                                 |                                                                                                                                                                                                                                                                                                   | age-matched counterparts                                                                                                              |
| <p>Davis et al. (2006)</p> <p>USA</p> <p>0.203 (43)</p> <p>Level III</p>   | <p>(1) To explore the relationship btwn sex &amp; outcome in adult pts w/ mod-sev TBI using large trauma registry</p> <p>(2) Retrospective comparative study</p> <p>(3) Country wide trauma registry</p> <p>(4) IC: admitted for at least 24h to 1/5 designated adult trauma centers</p> <p>EC: head/neck AIS defined by a neck inj</p> | <p>(1) N= 13437</p> <p>(2) N/A</p> <p>(3) Age (N) (<b>M;F</b>): 15-49: 7891; 1881 ≥50: 2368; 1297</p> <p>(4) Sex: 76.3%</p> <p>(5) N.R</p> <p>(6) IS: mod-sev TBI</p> <p>(7) N/A</p> <p>(8) N.R</p> | <p>(1) LRM</p> <p>(2) P &lt; 0.05</p>                                                                                    | <p>(1) Age, Sex, Comorbid Dx, Mechanism of inj</p> <p>Pre-AD GCS score, Presence of pre-AD hypotension (SBP≤ 90 mm Hg), Head AIS, &amp; ISS</p> <p>(2) N.R</p>                                                  | <p>(1) Survival to hospital DC</p> <p>(2) Medical records</p> <p>(3) Frequency of mortality (M;F):</p> <p>15-19: 19.0%; 20.7%</p> <p>20-29: 19.9%; 22.1%</p> <p>30-39: 21.0%; 21.0%</p> <p>40-49: 21.9%; 20.3%</p> <p>50-59: 25.1%; 16.2%</p> <p>60-69: 29.0%; 25.0%</p> <p>≥70: 37.5%; 30.3%</p> | <p>NS diff in outcomes observed for pre-menopausal W (15-49) vs M but outcomes SS better in postmenopausal F (≥50) vs M after adj</p> |
| <p>Fortuna et al. (2008)</p> <p>USA</p> <p>0.203 (43)</p> <p>Level III</p> | <p>(1) To determine whether preinjury CAW use was an important predictor of mortality in pts ≥50 y.o w/ blunt, HBI</p> <p>(2) Retrospective comparative study</p> <p>(3) University hospital</p> <p>(4) IC: ≥50 y.o, Dx of blunt head trauma</p>                                                                                        | <p>(1) N=416</p> <p>(2) N/A</p> <p>(3) Age: 69 ± 1</p> <p>(4) Sex: 61%</p> <p>(5) N.R</p> <p>(6) IS: ISS: 24 ± 0.5</p> <p>GCS: 12 ± 0.2</p> <p>(7) N/A</p> <p>(8) N.R</p>                           | <p>(1) Chi-square test</p> <p>t test</p> <p>ANOVA</p> <p>Tukey's post hoc analysis</p> <p>MLRM</p> <p>(2) P &lt;0.05</p> | <p>(1) Age, sex, ISS, GCS, CAW</p> <p>(2) Medication Intake (N):</p> <p>Clopidogrel- 17</p> <p>Aspirin- 91</p> <p>CLO/ASA- 18</p> <p>Warafin- 29</p> <p>ASA/ Warafin- 10</p> <p>Heparin- 1</p> <p>None- 250</p> | <p>(1) Mortality</p> <p>(2) Medical records</p> <p>(3) N.R</p>                                                                                                                                                                                                                                    | <p>SS predictors of death included Age, ISS, &amp; GCS</p> <p>Sex NS predictive factor of mortality</p>                               |

|                                                           |                                                                                                                                                                                                                                                                                                                                      |                                                                                                                                                                                                                                                                                                                  |                                                                                                                                                                         |                                                                                                                      |                                                                                                                  |                                                                                                                                    |
|-----------------------------------------------------------|--------------------------------------------------------------------------------------------------------------------------------------------------------------------------------------------------------------------------------------------------------------------------------------------------------------------------------------|------------------------------------------------------------------------------------------------------------------------------------------------------------------------------------------------------------------------------------------------------------------------------------------------------------------|-------------------------------------------------------------------------------------------------------------------------------------------------------------------------|----------------------------------------------------------------------------------------------------------------------|------------------------------------------------------------------------------------------------------------------|------------------------------------------------------------------------------------------------------------------------------------|
|                                                           | EC: no HBI                                                                                                                                                                                                                                                                                                                           |                                                                                                                                                                                                                                                                                                                  |                                                                                                                                                                         |                                                                                                                      |                                                                                                                  |                                                                                                                                    |
| Ottochian et al. (2009)<br>USA<br>0.203 (43)<br>Level III | (1) To examine outcomes between the sexes after TBI<br>(2) Retrospective cohort study<br>(3) Medical center<br>(4) IC: suffered blunt trauma, isolated sev TBI<br>EC: transferred to another acute care facility before 1wk, nonsurvivable head injuries (head AIS 6)                                                                | (1) N= 1807<br>(2) N/A<br>(3) Age (M;F): 43.0±20.7; 50.8±26.6<br>Age >55 y.o (M;F): 26.6%; 45.2%<br>(4) Sex: 77.5%<br>(5) N.R<br>(6) IS: sev isolated TBI<br>(7) N/A<br>(8) N.R                                                                                                                                  | (1) Chi-square<br>2-sided Fisher exact test<br>Student t test<br>Kruskal-Wallis test<br>Mann-Whitney test<br>Binary logistic regression<br>Adj odd ratio<br>(2) P <0.05 | (1) Sex, Age, AD SBP, AD GCS, ISS, Ethnicity & Toxicology<br>(2) N.R                                                 | (1) Mortality<br>(2) Medical records<br>(3) Frequency of Mortality (M;F): 29.5 (172/582) %; 41.5% (244/582)      | F TBI pts had a SS ↑ mortality rate compared w/ their M counterparts<br><br>Age group SS assoc w/ the ↑ mortality rate was ≥55 y.o |
| Selassie et al. (2014)<br>USA<br>0.203 (43)<br>Level III  | (1) To determine the influence of a number of factors on mortality after DC from acute care facilities in TBI pts<br>(2) Retrospective cohort study<br>(3) Medical center data set<br>(4) IC: cases with ICD-9-CM Dx codes: 800-801, 803-804, 850-854 & 959.01<br>EC: Pts coded as late effects of intracranial inj (907.0) & repeat | (1) N= 33695 (5413= Deceased; 28282= Alive)<br>(2) N/A<br>(3) Age (Total): 42.8<br>(4) Sex (Total): 64.1%<br>Deceased: 52.7%<br>Alive: 66.3%<br>(5) N.R<br>(6) IS % (Total; Deceased; Alive):<br>Severe: 34.7%; 45.9%; 32.5%<br>Moderate: 19.6%; 19.3%; 19.7%<br>Mild: 45.7%; 34.8%; 47.8%<br>(7) N/A<br>(8) N.R | (1) t-test<br>Chi-square test<br>HR<br>Multivariable<br>Cox regression<br>(2) P < 0.001                                                                                 | (1) Comorbidities, TBI severity, Concomitant inj, Age, Sex, Race, Insurance status, Trauma facility level<br>(2) N.R | (1) Mortality<br>(2) Medical records<br>(3) Frequency of Mortality (M; W): 52.7% (2851/5413) ; 47.3% (2562/5413) | TBI severity, Age & Sex all SS associate of mortality after DC                                                                     |



|                                                                             |                                                                                                                                                                                                                                                                                                                                                                                                                                                     |                                                                                                                                                                                                                                                                                                                                                                                                                              |                                                     |                                                                                          |                                                                                                                                                                   |                                                                                                                                                                                                                                                                                                                                                                                                                                                                                                                  |
|-----------------------------------------------------------------------------|-----------------------------------------------------------------------------------------------------------------------------------------------------------------------------------------------------------------------------------------------------------------------------------------------------------------------------------------------------------------------------------------------------------------------------------------------------|------------------------------------------------------------------------------------------------------------------------------------------------------------------------------------------------------------------------------------------------------------------------------------------------------------------------------------------------------------------------------------------------------------------------------|-----------------------------------------------------|------------------------------------------------------------------------------------------|-------------------------------------------------------------------------------------------------------------------------------------------------------------------|------------------------------------------------------------------------------------------------------------------------------------------------------------------------------------------------------------------------------------------------------------------------------------------------------------------------------------------------------------------------------------------------------------------------------------------------------------------------------------------------------------------|
|                                                                             | encounters with the same Dx                                                                                                                                                                                                                                                                                                                                                                                                                         |                                                                                                                                                                                                                                                                                                                                                                                                                              |                                                     |                                                                                          |                                                                                                                                                                   |                                                                                                                                                                                                                                                                                                                                                                                                                                                                                                                  |
| <p>Boutin et al. (2017)</p> <p>Canada</p> <p>0.098 (18)</p> <p>Level II</p> | <p>(1) To evaluate RBCT frequency, determinants of transfusions &amp; assoc clinical outcomes</p> <p>(2) Retrospective cohort study</p> <p>(3) Multiple trauma centers</p> <p>(4) IC: Adult pts (aged ≥18 y.o) w/ a mod or sev TBI defined using ICD-10 S06 &amp; GCS) scores &lt;13 or intubated on AD, admitted to one of the centers participating to the registry btwn April 2005-March 2013</p> <p>EC: pts w un linked records to database</p> | <p>(1) N= 7062 (1991= RBCT)</p> <p>(2) N/A</p> <p>(3) Age (Total; RBCT):</p> <p>18–55: 61.4%; 67.6%</p> <p>56–65: 11.7%; 12.7%</p> <p>66–75: 9.9%; 8.7%</p> <p>≥75: 17.0%; 11.0%</p> <p>(4) Sex (Total; RBCT): 73.2%; 68.7%</p> <p>(5) N.R</p> <p>(6) IS (Total; RBCT):</p> <p>GCS-Mod: 21.4%; 14.0%</p> <p>Sev: 25.3%; 25.4%</p> <p>Missing: 53.3%; 60.7%</p> <p>AIS≥3 Head: 94.6%; 92.4%</p> <p>(7) N/A</p> <p>(8) N.R</p> | <p>(1) RR HR</p> <p>(2) P&lt; 0.05</p>              | <p>(1) Sex, Age, Comorbidities, Severity &amp; Extracerebral injuries</p> <p>(2) N.R</p> | <p>(1) RBCT &amp; Outcomes according to transfusion status</p> <p>(2) Medical records</p> <p>(3) Frequency of RBCT (M;F): 68.7% (1368/1991); 31.3% (623/1991)</p> | <p>Sex (W), Age (15-65 ≥75), mod TBI all SS predictors of / RBCT</p> <p>Mortality outcome: Age (18-55) &amp; sev TBI (GCS) SS predictors</p> <p>Complications outcome: Age (18-55, 56-65, 66-75, ≥75), mod &amp; sev TBI (GCS) SS predictors</p> <p>ICU outcome: Age (56-65, 66-75, ≥75), mod &amp; sev TBI (GCS) SS predictors</p> <p>Hospital stay outcome: Age (18-55, 56-65, 66-75, ≥75) mod &amp; sev TBI (GCS) SS predictors</p> <p>DC home: Age (18-55, 56-65), mod &amp; sev TBI (GCS) SS predictors</p> |
| <p>Brown et al. (2012)</p> <p>Canada</p>                                    | <p>(1) To investigate the diff in DC destination following acute care btwn M &amp; W survivors of TBI</p> <p>(2) Retrospective comparative study</p>                                                                                                                                                                                                                                                                                                | <p>(1) N= 3480</p> <p>(2) N/A</p> <p>(3) Median Age (M;F): 70-74; 75-79</p> <p>(4) Sex: 45.4%</p>                                                                                                                                                                                                                                                                                                                            | <p>(1) Chi-square test</p> <p>Mann-Whitney test</p> | <p>(1) Sex, Age, ISS, LOS, comorbidities, mechanism of inj</p> <p>(2) N.R</p>            | <p>(1) DC destination (care facility)</p> <p>(2) Minimal Data Set of the Ontario Trauma Registry</p>                                                              | <p>Sex, Age &amp; IS all SS associate wof DC destination</p>                                                                                                                                                                                                                                                                                                                                                                                                                                                     |

|                                                        |                                                                                                                                                                                                                                                                                                 |                                                                                                                                                                                                                                                                                                                        |                                                                            |                                                                                                   |                                                                                                                                                                                                                                                                    |                                                                                                                                                                   |
|--------------------------------------------------------|-------------------------------------------------------------------------------------------------------------------------------------------------------------------------------------------------------------------------------------------------------------------------------------------------|------------------------------------------------------------------------------------------------------------------------------------------------------------------------------------------------------------------------------------------------------------------------------------------------------------------------|----------------------------------------------------------------------------|---------------------------------------------------------------------------------------------------|--------------------------------------------------------------------------------------------------------------------------------------------------------------------------------------------------------------------------------------------------------------------|-------------------------------------------------------------------------------------------------------------------------------------------------------------------|
| 0.098 (18)<br>Level III                                | (3) Multiple acute care hospitals<br>(4) IC: >65 y.o, sustained a mod-sev TBI & were DC to a LTC facility, home w/ or w/o support services<br>EC: N.R                                                                                                                                           | (5) N.R<br>(6) IS: ISS (M;F): 9.4±6.7; 9.6±7.0<br>(7) N/A<br>(8) N.R                                                                                                                                                                                                                                                   | Binary logistic regression<br>Multiple Logistic Regression<br>(2) P <0 .05 |                                                                                                   | (3) DC Destination (M;F): Home: 83% (1311/1581); 76% (1435/1899)<br>Away: 17% (270/1581); 24% (464/1899)                                                                                                                                                           | Following TBI, W were SS more likely than M to be sent to LTC facilities rather than home settings controlling for age, IS, mechanism of inj, & comorbidities     |
| Côte et al. (2013)<br>Canada<br>0.098 (18)<br>Level IV | (1) To identify factors assoc w/ decisions to withdraw life-sustaining therapies in pts w/ sev TBI<br>(2) Case series<br>(3) 6 level 1 trauma centers<br>(4) IC: mechanically ventilated pts, ≥16 y.o, admitted to an ICU following a sev blunt TBI documented in emerg or at ICU AD<br>EC: N.R | (1) N= 720 (228=non-survivors)<br>Non-survivors: Withdrawal of life-sustaining therapies= 160<br>No withdrawal= 68<br>(2) N/A<br>(3) Age >55 (Withdrawal, No Withdrawal): 55.0%; 33.8%<br>Mean age: 50.7±21.7<br>(4) Sex (Withdrawal, No Withdrawal): 68.8%; 73.5%<br>(5) N.R<br>(6) IS: sev TBI<br>(7) N/A<br>(8) N.R | (1) MLRM Pearson chi-square test<br>(2) P < 0.05                           | (1) Sex, Age, Clinical factors, CT scan & Interventions<br>(2) N.R                                | (1) Factors assoc w/ decision to withdraw life-sustaining therapies<br>(2) Medical records<br>(3) Frequency of Withdrawal of Life-Sustaining Therapies (M;F): 68.8% (88/160); 31.2% (72/180)<br><br>Frequency of No Withdrawal (M;F): 33.8% (23/68); 66.2% (45/68) | Sex & Age not SS predictors of decision to withdrawal life-sustaining therapies<br><br>CT scan Epidural Hematoma/hemorrhage & Herniation SS predictors of outcome |
| Hoffman et al. (2012)<br>USA                           | (1) To evaluate the impact of Medicare's inpt rehab facility PPS on use of rehab for individuals w/ TBI                                                                                                                                                                                         | (1) N= 135842 (71561=Pre-PPS; 64281=Post-PPS)<br>(2) N/A<br>(3) Age (Pre-; Post-                                                                                                                                                                                                                                       | (1) t test Mann-Whitney U test MLRM<br>(2) P < 0.05                        | (1) Age, Sex, Race, Cause of injury, GCS, AIS head, ISS nonhead, Insurance, Facility & PPS status | (1) DC location<br>(2) Medical records<br>(3) N.R                                                                                                                                                                                                                  | Age, Sex & IS all SS associate wof outcome                                                                                                                        |

|                                                                   |                                                                                                                                                                                                                                                                                                                      |                                                                                                                                                                                                                                                                                                          |                                                                                        |                                                                                            |                                                                                                                                                                                                                                              |                                                                                                                                                                                                          |
|-------------------------------------------------------------------|----------------------------------------------------------------------------------------------------------------------------------------------------------------------------------------------------------------------------------------------------------------------------------------------------------------------|----------------------------------------------------------------------------------------------------------------------------------------------------------------------------------------------------------------------------------------------------------------------------------------------------------|----------------------------------------------------------------------------------------|--------------------------------------------------------------------------------------------|----------------------------------------------------------------------------------------------------------------------------------------------------------------------------------------------------------------------------------------------|----------------------------------------------------------------------------------------------------------------------------------------------------------------------------------------------------------|
| 0.203 (43)<br><br>Level III                                       | (2) Retrospective comparative study<br>(3) 123 level I and II trauma centers<br>(4) IC: AIS head score of $\geq 2$<br>EC: N.R                                                                                                                                                                                        | PPS): 35.0 $\pm$ 22.5;<br>37.0 $\pm$ 23.5<br>(4) Sex (Pre-; Post-PPS): 70.0%;<br>69.8%<br>(5) N.R<br>(6) IS (Pre-; Post-PPS):<br>GCS: 12.7 $\pm$ 3.8;<br>13.2 $\pm$ 3.4<br>AIS head:<br>3.21 $\pm$ 0.94;<br>3.23 $\pm$ 0.93<br>(7) N/A<br>(8) N.R                                                        |                                                                                        | (2) N.R                                                                                    |                                                                                                                                                                                                                                              | After controlling for pt characteristics, inj characteristics, insurance type, & facility, odds of being DC to an Inpt Rehab facility after TBI $\downarrow$ 16% after Medicare's PPS system was enacted |
| Kisat et al. (2012)<br><br>USA<br><br>0.203 (43)<br><br>Level III | (1) To determine pt & inj characteristics that predict a (+) CT scan or need for a Neurosurgical Procedure in pts w/ blunt head inj & a normal GCS<br>(2) Retrospective comparative study<br>(3) National Trauma Data Bank<br>(4) IC: $\geq 16$ y.o, presented to ED w/ minor HI<br>EC: missing head CT scan results | (1) N= 83566 Total Pop<br>(59153= (-) CT scan; 24424= (+) CT scan)<br>(3476= Underwent Neurosurgical Procedure; 80090= No Procedure)<br>(2) N/A<br>(3) Age (Total Pop):<br>16-25: 26.7%<br>26-35: 16.2%<br>36-45: 16.1%<br>46-55: 13.6%<br>56-65: 8.4%<br>66-75: 6.6%<br>76-84: 6.8%<br>$\geq 85$ : 2.9% | (1) Student's t test<br>Chi-square test<br>Univariate analysis<br>MLRM<br>(2) P < 0.05 | (1) Age, Sex, Hypotension, Race, Insurance coverage, Mechanism of inj & CT scan<br>(2) N.R | (1) (+) head CT scan & Neurosurgical Procedure<br>(2) Medical records<br>(3) Frequency of (+) CT scan (M;F): 66.5% (16232/24414);<br>33.5%(8182/24414)<br><br>Frequency of Neurosurgical Procedure (M;F): 72.3% 2514/3476;<br>27.7% 937/3476 | Older pts ( $\geq 36$ ) more likely to have a (+) finding on a head CT scan – Sex not SS factor<br><br>Sex (M), Age (46-55, 56-65, 76-84) & (+) CT scan SS predictors<br>Neurosurgical Procedure         |

|  |  |                                                                                                                                                                   |  |  |  |  |
|--|--|-------------------------------------------------------------------------------------------------------------------------------------------------------------------|--|--|--|--|
|  |  | (4) Sex (Total Pop):<br>66.7%<br>(5) TSI: ED, N.R<br>(6) IS (Total Pop):<br>AIS-<br>1: 19.9%<br>2: 44.6%<br>3: 19.2%<br>4: 14.2%<br>5: 2.2%<br>(7) N/A<br>(8) N.R |  |  |  |  |
|--|--|-------------------------------------------------------------------------------------------------------------------------------------------------------------------|--|--|--|--|

|                                                                  |                                                                                                                                                                                                                                                                                                                                                                                                                                |                                                                                                                                                                                                                                                                                                                                                                                                                                                                                                                                                                                   |                                                                                 |                                                                                    |                                                                                                                                                                                                                                                                                                                                                                                                                                                                                                                                                                                                                                                                          |                                                                                                                                                                                                                                                                                                                                                                                                                                                                                           |
|------------------------------------------------------------------|--------------------------------------------------------------------------------------------------------------------------------------------------------------------------------------------------------------------------------------------------------------------------------------------------------------------------------------------------------------------------------------------------------------------------------|-----------------------------------------------------------------------------------------------------------------------------------------------------------------------------------------------------------------------------------------------------------------------------------------------------------------------------------------------------------------------------------------------------------------------------------------------------------------------------------------------------------------------------------------------------------------------------------|---------------------------------------------------------------------------------|------------------------------------------------------------------------------------|--------------------------------------------------------------------------------------------------------------------------------------------------------------------------------------------------------------------------------------------------------------------------------------------------------------------------------------------------------------------------------------------------------------------------------------------------------------------------------------------------------------------------------------------------------------------------------------------------------------------------------------------------------------------------|-------------------------------------------------------------------------------------------------------------------------------------------------------------------------------------------------------------------------------------------------------------------------------------------------------------------------------------------------------------------------------------------------------------------------------------------------------------------------------------------|
| Li et al.<br>(2018)<br><br>USA<br><br>0.203 (43)<br><br>Level II | <p>(1) To investigate the effects of age &amp; sex on 30-, 60-, &amp; 90d hospital readmission after acute hospital DC for individuals w/ TBI</p> <p>(2) Retrospective cohort study</p> <p>(3) Nationwide Readmissions Database</p> <p>(4) IC: pts w/ TBI based on the ICD codes (800.XX, 802.XX, 803.XX, 804.XX, 851.XX-854.XX, &gt;18 y.o, EC: ICD code 850.XX (Concussion), those who dies during index hospitalization</p> | <p>(1) N= 52, 877 (30d Readmission=5287 7; 60d Readmission=4830 0; 90d Readmission=4340 8)</p> <p>(2) N/A</p> <p>(3) Age (30d; 60d; 90d Readmission):<br/>18-40: 21.5%; 21.6%; 21.7%<br/>41-65: 27.5%; 27.5%; 27.7%<br/>66-75: 14.1%; 14.0%; 14.0%<br/>≥76: 37.0%; 36.8%; 36.7%</p> <p>(4) Sex (30d; 60d; 90d Readmission):<br/>59.1%; 59.3%; 59.3%</p> <p>(5) N.R</p> <p>(6) IS (30d; 60d; 90d Readmission):<br/>DRG-<br/>Minor: 26.9%; 27.0%; 27.2%<br/>Mod: 42.3%; 42.3%; 42.1%<br/>Major: 23.5%; 23.5%; 23.5%<br/>Extreme: 7.3%; 7.35; 7.2%</p> <p>(7) N/A</p> <p>(8) N.R</p> | <p>(1) Multivariate logistic regression</p> <p>(2) <math>P \leq 0.05</math></p> | <p>(1) Age, Sex, Severity, DC Destination &amp; Teaching status</p> <p>(2) N.R</p> | <p>(1) Hospital Readmission</p> <p>(2) Medical records</p> <p>(3) Frequency of Hospital Readmissions (age-by-sex weekly):<br/>M (1<sup>st</sup>; 2<sup>nd</sup>; 3<sup>rd</sup>; 4<sup>th</sup>; 5<sup>th</sup> week)<br/>18-40: 34.92; 17.01; 7.56; 6.76; 5.45<br/>41-65: 27.56; 15.78; 11.81; 8.20; 6.53<br/>66-75: 29.91; 15.29; 10.46; 7.75; 6.49<br/>≥76: 29.02; 16.67; 9.48; 8.41; 6.22</p> <p>W (1<sup>st</sup>; 2<sup>nd</sup>; 3<sup>rd</sup>; 4<sup>th</sup>; 5<sup>th</sup> week)<br/>18-40: 35.15; 14.05; 7.22; 6.79; 5.98<br/>41-65: 26.57; 17.88; 9.59; 8.80; 7.11<br/>66-75: 26.00; 18.14; 13.35; 6.27; 4.98<br/>≥76: 27.12; 15.80; 10.31; 8.16; 6.61</p> | <p>Sex diff in 30-, 60-, &amp; 90d hospital readmission were found in all age groups- all SS predictors of outcome</p> <p>The largest sex diff in hospital readmission were in the 2 oldest groups (66-75 &amp; ≥76)</p> <p>For both sexes, the oldest group (≥76) had the highest adj 90d readmission risk for M</p> <p>In those readmitted w/in 90d, the youngest group (18-40) had the ↑ cumulative readmission % (35% for both sexes) w/in the 1<sup>st</sup> week of hospital DC</p> |
|------------------------------------------------------------------|--------------------------------------------------------------------------------------------------------------------------------------------------------------------------------------------------------------------------------------------------------------------------------------------------------------------------------------------------------------------------------------------------------------------------------|-----------------------------------------------------------------------------------------------------------------------------------------------------------------------------------------------------------------------------------------------------------------------------------------------------------------------------------------------------------------------------------------------------------------------------------------------------------------------------------------------------------------------------------------------------------------------------------|---------------------------------------------------------------------------------|------------------------------------------------------------------------------------|--------------------------------------------------------------------------------------------------------------------------------------------------------------------------------------------------------------------------------------------------------------------------------------------------------------------------------------------------------------------------------------------------------------------------------------------------------------------------------------------------------------------------------------------------------------------------------------------------------------------------------------------------------------------------|-------------------------------------------------------------------------------------------------------------------------------------------------------------------------------------------------------------------------------------------------------------------------------------------------------------------------------------------------------------------------------------------------------------------------------------------------------------------------------------------|

|                                                                     |                                                                                                                                                                                                                                                                                                                                                                                                                         |                                                                                                                                                                                                                                                                              |                                                                   |                                                                                                                                                                             |                                                                                                                                                                                                  |                                                                                                                                                                                                           |
|---------------------------------------------------------------------|-------------------------------------------------------------------------------------------------------------------------------------------------------------------------------------------------------------------------------------------------------------------------------------------------------------------------------------------------------------------------------------------------------------------------|------------------------------------------------------------------------------------------------------------------------------------------------------------------------------------------------------------------------------------------------------------------------------|-------------------------------------------------------------------|-----------------------------------------------------------------------------------------------------------------------------------------------------------------------------|--------------------------------------------------------------------------------------------------------------------------------------------------------------------------------------------------|-----------------------------------------------------------------------------------------------------------------------------------------------------------------------------------------------------------|
| Rush et al.<br>(2016)<br><br>USA<br><br>0.203 (43)<br><br>Level III | (1) To characterize the surgical management of ASDH & to determine the independent assoc of DC for ASDH compared to Craniotomy<br>(2) Retrospective comparative study<br>(3) Nationwide inpt sample database<br>(4) IC: $\geq 18$ y.o, primary Dx of traumatic Subdural Hemorrhage (ICD9 codes 852.20–852.29) from the 2006–2011 NIS sample, underwent Craniotomy or Craniectomy<br>EC: pts w/ codes for both surgeries | (1) N= 302 propensity matched cohort<br>(151=Craniotomy; 151= Craniectomy)<br>(2) N/A<br>(3) Age<br>(Craniotomy; Craniectomy):<br>52.73 $\pm$ 21.5;<br>52.37 $\pm$ 20.2<br>(4) Sex<br>(Craniotomy; Craniectomy):<br>69.9%; 71.7%<br>(5) N.R<br>(6) N.R<br>(7) N/A<br>(8) N.R | (1) Chi-square test<br>Independent t test<br>MLRM<br>(2) P < 0.05 | (1) Age, Time, Sex, Zip code<br>Income, Race, Hospital teaching status, Hospital location, Hospital size, Hospital region, Comorbidities & APRDRG severity index<br>(2) N.R | (1) Undergoing a Craniectomy<br>(2) Medical records<br>(3) Frequency of Craniotomy (M;F): 69.9% (106/151); 30.1% (45/151)<br><br>Frequency of Craniectomy (M;F): 71.7% (108/151); 28.3% (43/151) | In the USA in pts w/ ASDH, craniotomy is performed 10x more often than decompressive craniectomy<br><br>Age & APDRG Severity Index SS associate w undergoing a Craniectomy<br>Sex NS predictor of outcome |
|---------------------------------------------------------------------|-------------------------------------------------------------------------------------------------------------------------------------------------------------------------------------------------------------------------------------------------------------------------------------------------------------------------------------------------------------------------------------------------------------------------|------------------------------------------------------------------------------------------------------------------------------------------------------------------------------------------------------------------------------------------------------------------------------|-------------------------------------------------------------------|-----------------------------------------------------------------------------------------------------------------------------------------------------------------------------|--------------------------------------------------------------------------------------------------------------------------------------------------------------------------------------------------|-----------------------------------------------------------------------------------------------------------------------------------------------------------------------------------------------------------|

**Abbreviations:** AD, admission; adj, adjusted; AIS, Abbreviated Injury Scale; ANKK1, Ankyrin repeat and kinase domain containing 1; ANOVA; analysis of variance; AP, arterial pressure; APOE, apolipoprotein E; APRDRG, All Pts Revised Diagnosis Related Groups; ASA, aspirin; ASDS, Acute Stress D/O Scale; ASDS-Diss, Acute Stress D/O Scale-Dissociative Score; assoc, association; AT: assessment time points; AUC, area under curve; AUD, Alcohol Use D/O; BAI, Beck's anxiety inventory; BDI-II, Beck Depression Inventory II; BCVI, Blunt cerebrovascular injury; BL, baseline; btwn, between; BP, blood pressure; CAW, clopidogrel, aspirin, or warfarin; CCI, Charlson Comorbidity Index; CDR, Clinical Dementia Rating; CES-D, Center for Epidemiological Studies-Depression; CHART-SF, Craig Handicap Assessment and Reporting Technique–Short Form; CHI, closed head injury; CI, confidence interval, CIQ, Community Integration Questionnaire; CLO, Clopidogrel; CLTR, Consistent Longer Term Retrieval Score; CNS, central nervous system; cog, cognition; COMT, catechol-o-methyltransferase; conc, concentration; COWAT, Controlled oral word association test; CPP, cerebral perfusion pressure; cRTW, complete return to work; CT, computed tomography; CSF, cerebrospinal fluid; CVLT, California Verbal Learning Test; d, day; DA, dopamine; DAT, DA transporter; DC, discharge; DOPAC, dihydroxyphenylacetic acid; diff, differences; DRD2, Dopamine Receptor D2; DRG, Diagnosis Related Groups; D/O, disorder; DSC, WAIS- III Digit Symbol Coding Score; DSM, Diagnostic and Statistical Manual of Mental D/Os; DST, digit span test; Dx, D/O/Diagnosis; D-KEFS, Delis–Kaplan Executive Function System; EC, exclusion criteria; ED, emergency department; est, estimate; ESS, Epworth Sleepiness Scale; F, female; FIM, Functional Independence Measure; FiO<sub>2</sub>, oxygen inspired fraction; FSE, functional status examination; FSIQ, Full Scale Intelligence Quotient; F/U, follow-up; GADGMC, Generalized Anxiety D/O due to General Medical D/O; GCS, Glasgow Coma Scale; GED, General Equivalency Diploma; GOSEGB; Glasgow Outcome Scale Extended Good/Bad outcome; GOS-E, Glasgow Outcome Scale- Extended; gov, government; GMHR,

General Medical Health Rating; GRS; gene risk score; GSW, gunshot wounds; h, hour; HADS, Hospital Anxiety and Depression Scale; Hb, hemoglobin; HBI, hemorrhagic brain injury; hetero, heterozygous; HI, head injury; HISC, Head Injury Symptom Checklist; Hg, Mercury; HLM, Hierarchical linear modelling; HMO, Health Maintenance Organization; homo, homozygous; HR, hazard regression; HSQ, Health Status Questionnaire; HVA, homovanillic acid; Hx, history; IC, inclusion criteria; ICF, intermediate care facility; ICD, International Statistical Classification of D/Os and Related Health Problems; ICP, intracranial pressure; ICU, intensive care unit; inj, injury; IS, injury severity; ISI; Insomnia Severity Index; ISS, injury severity score; IQ, intelligence quotient; Junior-ES, junior elderly subjects; LOC, loss of consciousness; LOS, length of stay; LRM, Logistic regression model; LS, life satisfaction; LTC, long term care; M, man/male; MANOVA, multiple analysis of variance; MANCOVA, Multivariate Analysis of Covariance; MDGMC, Major Depressive-like Episode due to General medical D/O; medication, med; MHI, mild head injury; MI, multiple injuries; min., minimum; MINI, Mini International Neuropsychiatric Inventory; mins, minutes; MLRM, Multivariate Logistic/Linear Regression Model; mm, millimeter; mmol; millimole; MMSE, mini-mental status examination; mod, moderate; mos, months; MRI, magnetic resonance imaging; MRM, Multivariate/multivariable regression model; MSI, multisensory impairment; mTBI, mild traumatic brain injury; MVA, motor vehicle accident; NFI, Neurobehavioral Functioning Inventory; nRTW, no return to work; NS, not significant; N.R, not reported; N/A, not applicable; OR, Odds Ratio; PaO<sub>2</sub>, oxygen arterial pressure; PATH, Patient and Total Health; PbrO<sub>2</sub>, Brain tissue oxygen pressure; PCS, Postconcussion Syndrome; PCSC, Postconcussion Syndrome Checklist; PHQ, Patient Health Questionnaire; pt, patient; PIQ, Performance Intelligence Quotient; pop, population; post-inj, post-injury; PPS, prospective payment system; PR, postresuscitation; pRTW, partial return to work; PR-M, postresuscitation-motor; PSG, Polysomnography; PTA, post-traumatic amnesia; PTCI, Posttraumatic cerebral infarction; PTSD, Post-Traumatic Stress D/O; pre-inj, pre-injury; pts, pts; P-VAS, Pain Visual Analogue Scale; RBCT, red blood cell transfusion; RDI, Respiratory disturbance index; ref, reference; REM, rapid eye movement; rehab, rehabilitation; retro, retrospective; RLAS, Ranchos Los Amigos Levels of Cognitive Functioning Scale; RM, Regression Model; ROCF, Rey–Osterrieth complex figure test; RPCS, Rivermead Post Concussion Symptom Questionnaire; RR, risk ratio; RTS, Revised trauma score; RTW, return to work; SBP, systolic blood pressure; SCI, spinal cord injury; SCZ, schizophrenia; SD, standard deviation; SDMT, Symbol Digit Modalities Test; SES, socioeconomic status; Senior-ES, senior elderly subjects; sev, severe; SEQRT1, Sequential Reaction Time Test; sign, significant; SIP, Symptom impact profile; SIP-AB, Symptom impact profile- alertness behavior; SNF, skilled nursing facility; SNSB, Seoul Neuropsychological Screening Battery; SOBHA, Shortness of Breath/ Headache; SS, statistically significant; SSRI, Selective serotonin reuptake inhibitor; STW, Spot-the-Word test; SUB, Substance Use D/O; SWLS, Satisfaction with life scale; Sx, symptom; TBI, traumatic brain injury; TBIMS, Traumatic Brain Injury Model Systems; TMT, trail making test; TOI, time of injury; TRISS, Trauma Injury Severity Score; TSI, time since injury; tx, treatment; VA-DOD; Veteran Affairs- Department of Defense; VF, Verbal Fluency Test; VIQ, Verbal Intelligence Quotient; VMAT, vesicular monoamine transporter; vs, versus; WAIS, Wechsler Adult Intelligence Scale; WEPCE, weeks in paid competitive employment; wks, weeks; WMS, Wechsler Memory Scale; w/, with; w/in, within; w/o, without; yrs, years; y.o, years old

**Supplementary Table 5: Summary of study characteristics, samples, and results pertaining to sex/gender and outcomes.**

| <b>Study Outcome-<br/>Sex or gender?</b>                  | <b>Age (y)/<br/>Stage, time since injury, and time of post-<br/>injury assessment</b>           | <b>Analysis controls for<br/>PROGRESS or related<br/>variables</b>                                                                                                            | <b>Sex/gender related results</b>                                                                                                                  |
|-----------------------------------------------------------|-------------------------------------------------------------------------------------------------|-------------------------------------------------------------------------------------------------------------------------------------------------------------------------------|----------------------------------------------------------------------------------------------------------------------------------------------------|
| Stroke <sup>53</sup><br>Sex/gender                        | Mean (SD): 46.1 (20.1)/<br>-Chronic<br>-Mean (SD) time of assessment: 1.94 (1.18)<br>y          | -Urbanization<br>-Socioeconomic status                                                                                                                                        | Male persons have a higher risk of stroke after TBI.                                                                                               |
| PCS <sup>61</sup><br>Sex/gender                           | Mean (SD):<br>34.7 (13.7)/<br>-Acute<br>-Mean (SD):<br>4.9 (2.63) d                             | -None                                                                                                                                                                         | Female persons more likely to experience PCS.                                                                                                      |
| Alcohol use disorder<br>(AUD) <sup>67</sup><br>Sex/gender | Mean (SD):<br>29.75 (7.71)/<br>NR                                                               | None                                                                                                                                                                          | <u>Male veterans</u><br>-Positively associated with AUD: PTSD<br>-Negatively associated with AUD: Age<br><u>Female veterans</u><br>None            |
| Insomnia <sup>63</sup><br>Potentially sex                 | Mean (SD):<br>45.2 (9.9)/<br>-Chronic<br>-Median (IQR) time since injury:<br>197 (139 – 416) d  | -Education<br>-English as a first language<br>-Weekly income<br>-Working status<br>-Having close friends<br>-Family difficulties<br>-Marital status<br>-Children in household | Sex not associated with insomnia frequency and severity.                                                                                           |
| Chronic pain <sup>64</sup><br>Potentially sex             | Mean (SD):<br>45.2 (9.94)/<br>-Chronic<br>-Median (IQR) time since injury:<br>197 (139 – 416) d | -Education<br>-English as a first language<br>-Working status<br>-Working > 40 hours/week                                                                                     | <u>Male persons and Female persons combined</u><br>Sex is not associated with pain.<br><br>Differing higher pain scores' associations based on sex |



|                                                                                   |                                                                                                                                                                          |                                                                                      |                                                                                                                                                          |
|-----------------------------------------------------------------------------------|--------------------------------------------------------------------------------------------------------------------------------------------------------------------------|--------------------------------------------------------------------------------------|----------------------------------------------------------------------------------------------------------------------------------------------------------|
| Sleep architecture deviations from normative data <sup>65</sup><br>Sex/gender     | Mean (SD): 47.5 (11.3)/<br>-Chronic<br>-Median (IQR) time since injury: 799 (135-9008) d                                                                                 | -Education                                                                           | Sex/gender not associated with deviations in sleep stage distribution.                                                                                   |
| Multisensory impairment <sup>54</sup><br>Sex/gender                               | Mean (SD): 30.6 (8.2)/<br>NR                                                                                                                                             | -Branch of service<br>-Rank                                                          | Veteran Female persons more likely to report symptoms of multisensory impairments.                                                                       |
| Red blood cell transfusion <sup>104</sup><br>Sex/gender                           | -Acute<br>-NR (during hospital stay)                                                                                                                                     | None                                                                                 | Female persons more likely to have red blood cell transfusion.                                                                                           |
| Pneumonia <sup>80</sup><br>Sex/gender                                             | Mean (SD):<br><u>Male persons</u><br>44.8 (21.6)<br><u>Female persons</u><br>40.7 (17.3)/<br>-Acute<br>-NR (during hospital stay)                                        | None                                                                                 | Factors associated with pneumonia are the same in Male persons and Female persons, with the exception of advanced age, only significant in Male persons. |
| Cerebral oxygenation after red blood cell transfusion <sup>73</sup><br>Sex/gender | Mean (SD):<br><u>Entire sample</u><br>35.4 (15.9)<br><u>Male persons</u><br>32.8 (13.9)<br><u>Female persons</u><br>45.5 (19.4)/<br>-Acute<br>-NR (during hospital stay) | None                                                                                 | Female persons exhibit greater cerebral oxygenation in response to red blood cell transfusion.                                                           |
| Cognition <sup>58</sup><br>Potentially sex                                        | Age group frequency<br>-16-24 (27%)<br>-25-34 (18.6%)<br>-35-44 (18.8%)<br>-45-54 (12.3%)<br>-55-64 (7.1%)<br>-65+ (16.2%)/                                              | -Relationship status<br>-Ethnicity<br>-Governmental funding<br>-Employment at injury | Female persons have worse outcomes with respect to cognitive symptomology                                                                                |

|                                                            |                                                                                                                                                                                                                                                                                                                                                   |                                                                                                             |                                                                                                                                                                                  |
|------------------------------------------------------------|---------------------------------------------------------------------------------------------------------------------------------------------------------------------------------------------------------------------------------------------------------------------------------------------------------------------------------------------------|-------------------------------------------------------------------------------------------------------------|----------------------------------------------------------------------------------------------------------------------------------------------------------------------------------|
|                                                            | -Chronic<br>-1 y                                                                                                                                                                                                                                                                                                                                  |                                                                                                             |                                                                                                                                                                                  |
| Craniotomy vs. craniectomy <sup>77</sup><br><br>Sex/gender | Mean (SD):<br>-68.9 (17.1) for craniotomy<br>-49.5 (20.8) for craniectomy/<br>-Acute<br>- < 1 d (during hospital stay)                                                                                                                                                                                                                            | -Race<br>-Insurance status<br>-Zip code income quartile<br>-Urban vs. rural hospital status                 | Sex/gender not associated with propensity score of receiving craniectomy vs. craniotomy.                                                                                         |
| Cerebral infarction <sup>74</sup><br><br>Sex/gender        | -Acute<br>-During hospital stay<br>-Mean (range) length of stay:<br>18 (2 – 124) d                                                                                                                                                                                                                                                                | None                                                                                                        | Sex/gender not associated with incidence of post-traumatic cerebral infarction.                                                                                                  |
| Hospital readmission <sup>106</sup><br><br>Sex/gender      | Frequency of age groups:<br><u>30 d readmission</u><br>-18-40 (21.5%)<br>-41-65 (27.5%)<br>-66-75 (14.1%)<br>- ≥76 (37%)<br><u>60 d readmission</u><br>-18-40 (21.6%)<br>-41-65 (27.5%)<br>-66-75 (14%)<br>- ≥76 (36.8%)<br><u>90 d readmission</u><br>-18-40 (21.7%)<br>-41-65 (27.7%)<br>-66-75 (14%)<br>- ≥76 (36.7%)/<br>-Acute<br>-30 – 90 d | -Primary payer<br>-Country of residence by urban status<br>-Country population<br>-Zip code income quartile | Older groups are more likely to be readmitted to hospitals 30-, 60-, and 90-days post-injury.<br><br>No adjusted comparison of odds for Male persons relative to Female persons. |
| Symptom impact <sup>92</sup><br><br>Sex/gender             | Mean (SD):<br>40.6 (19.9)<br>-Chronic<br>-1 y                                                                                                                                                                                                                                                                                                     | -Race<br>-Employment status at injury<br>-Funder                                                            | Female persons have worse outcomes with respect to cognitive symptomology.                                                                                                       |

|                                                                                         |                                                                                                                                                                                                                                                     |               |                                                                                                                                               |
|-----------------------------------------------------------------------------------------|-----------------------------------------------------------------------------------------------------------------------------------------------------------------------------------------------------------------------------------------------------|---------------|-----------------------------------------------------------------------------------------------------------------------------------------------|
| Sleep disturbances, daytime sleepiness, and sleep index <sup>86</sup><br><br>Sex/gender | Mean (SD):<br>43.2 (17.7)/<br>-Acute<br>-Trauma unit                                                                                                                                                                                                | None          | Female sex associated with shortness of breath and headache on univariate analysis, but not multivariate.                                     |
| Pituitary function <sup>94</sup><br><br>Sex/gender                                      | Mean (SD):<br><u>Female persons</u><br>55.1 (18.9)<br><u>Male persons</u><br>46.4 (18.6)/<br>-Acute<br>-12 w                                                                                                                                        | None          | Sex/gender not associated with pituitary insufficiency.                                                                                       |
| Brain lesions <sup>107</sup><br><br>Sex/gender                                          | Frequency of age groups (at injury):<br>-17-30 (54.1%)<br>-30-40 (12.2%)<br>-40-50 (14.3%)<br>-50-60 (13.3%)<br>-60-73.3 (6.1%)/<br>-Chronic<br>-Mean (SD) time since injury:<br>2.3 (1.5) y<br>-Median (IQR) time since injury:<br>2.2 (0.3-5.7) y | None          | Sex/gender not associated with white and gray matter lesion volumes.<br><br>Male persons have larger volumes of viable gray and white matter. |
| DeMale personstia <sup>83</sup><br><br>Sex/gender                                       | Median (range):<br>44.00 (27.00-64.00)/<br>-Acute<br>-Median (IQR) follow up time: 52 months                                                                                                                                                        | -Income level | Male persons have a greater relative risk of dementia.<br><br>Female persons develop dementia earlier after an injury.                        |
| Alcohol use disorder (AUD) <sup>67</sup><br><br>Sex/gender                              | Mean (SD):<br>29.75 (7.71)/<br>NR                                                                                                                                                                                                                   | None          | In male veterans, AUD diagnosis was associated with:<br>-Greater PTSD severity<br>-Younger age<br>-mTBI not predictive                        |

|                                                                                   |                                                                                                                                                                                                                                 |                                                             |                                                                                                                                                                                                                             |
|-----------------------------------------------------------------------------------|---------------------------------------------------------------------------------------------------------------------------------------------------------------------------------------------------------------------------------|-------------------------------------------------------------|-----------------------------------------------------------------------------------------------------------------------------------------------------------------------------------------------------------------------------|
|                                                                                   |                                                                                                                                                                                                                                 |                                                             | In female veterans, none of the assessed factors distinguished between those with an alcohol use disorder diagnosis and those without.                                                                                      |
| Schizophrenia <sup>82</sup><br><br>Non-affective psychosis<br><br>Sex/gender      | Frequency of age groups (at diagnosis):<br><u>Schizophrenia</u><br>-16-20 (36.8%)<br>-21-25 (51.6%)<br>-26+ (11.6%)<br><u>Non-affective psychosis</u><br>-16-20 (36.8%)<br>-21-25 (52%)<br>-26+ (11.2%)/<br>-Chronic<br>- < 3 y | -Childhood SES<br>-Area of birth (urban, rural, suburban)   | In both sexes, severe head injury is associated with subsequent non-affective psychoses, but not subsequent schizophrenia.                                                                                                  |
| Depression <sup>81</sup><br><br>Sex/gender                                        | Mean (range, SD):<br>43.6 (18.2 – 74.8, 15.2)/<br>-Chronic<br>-Mean time since injury (range, SD):<br>41.4 (4.3 – 260.2, 58.9) m                                                                                                | None                                                        | Female persons more likely to experience depression across severities, as indicated by a BDI-II score > 13.<br><br>No difference between the sexes for moderate and severe depression, as indicated by a BDI-II score > 19. |
| Return to work (RTW) between 6 and 12 months <sup>60</sup><br><br>Potentially sex | Mean (SD):<br>-49.1 (11.0) under no RTW<br>-44.6 (13.8) under partial RTW<br>-44.7 (12.1) under complete RTW/<br>-Chronic<br>-Time since injury:<br>6 m or 12 m                                                                 | -Education<br>-Occupational category<br>-Workload           | Sex/gender not associated with RTW.                                                                                                                                                                                         |
| Community integration <sup>62</sup><br><br>Potentially sex                        | Mean (SD):<br>45.2 (9.9)/<br>-Chronic<br>-Median<br>(IQR) time since injury: 197 (139 – 416) d                                                                                                                                  | -Education<br>-Marital status<br>-English as first language | Sex/gender not associated with community integration                                                                                                                                                                        |
| Disability <sup>66</sup><br><br>Sex/gender                                        | Mean (SD):<br>45.1 (9.9) y/<br>-Chronic                                                                                                                                                                                         | -Work status                                                | Sex/gender not associated with work, social, family/home life, or global disability.                                                                                                                                        |

|                                                         |                                                                                                                                 |                                                                                  |                                                                                                                                                                                                                                                                                                                                                                                                                                                                                                                                                                                                                                                                                                                            |
|---------------------------------------------------------|---------------------------------------------------------------------------------------------------------------------------------|----------------------------------------------------------------------------------|----------------------------------------------------------------------------------------------------------------------------------------------------------------------------------------------------------------------------------------------------------------------------------------------------------------------------------------------------------------------------------------------------------------------------------------------------------------------------------------------------------------------------------------------------------------------------------------------------------------------------------------------------------------------------------------------------------------------------|
|                                                         | -Median (IQR) time since injury: 196 (138 – 412) d                                                                              |                                                                                  |                                                                                                                                                                                                                                                                                                                                                                                                                                                                                                                                                                                                                                                                                                                            |
| Cognitive functioning <sup>70</sup><br><br>Sex/gender   | -Chronic<br>-Mean (SD) time since injury:<br><u>Male persons</u><br>22.37 (20.42) m<br><u>Female persons</u><br>25.39 (23.88) m | -Education                                                                       | Sex/gender, and sex/gender and time since injury not associated with performance on the neuro-psychological test measures.<br><br>Sex/gender and age associated with performance:<br>-Category test<br>-Trail making test<br><br>Females $\leq 30$ performed better than males of the same age, but males $\geq 30$ performed better.                                                                                                                                                                                                                                                                                                                                                                                      |
| Return to work (RTW) <sup>68</sup><br><br>Sex/gender    | Median (range): 32 (16 – 55)/<br>-Chronic<br>-12 m                                                                              | None                                                                             | Sex/gender not associated with RTW.                                                                                                                                                                                                                                                                                                                                                                                                                                                                                                                                                                                                                                                                                        |
| Work-related disability <sup>85</sup><br><br>Sex/gender | Mean (SD):<br>35.6 (12.6)/<br>-Chronic<br>-1 y                                                                                  | -Race<br>-Education<br>-Marital status<br>-Payer group<br>-Pre-injury employment | Female persons of all age groups more likely to work fewer hours after injury.<br><br>Female persons of all age groups, except the oldest (55-64 y), more likely than male to stop working after injury.<br><br>Female persons of all age groups, except the oldest (55-64 y), less likely than male to keep the same work hours after injury. In the oldest age group, male less likely than female to keep the same hours.<br><br>Female's likelihood of decreasing hours or stopping work more pronounced in married females.<br><br>Divorced male and female persons have a comparable likelihood of decreasing hours, while continuing working, but divorced females more likely to stop working than divorced males. |

|                                                                 |                                                                                                                                                      |                                                                                        |                                                                                                                                                                                                                                                                        |
|-----------------------------------------------------------------|------------------------------------------------------------------------------------------------------------------------------------------------------|----------------------------------------------------------------------------------------|------------------------------------------------------------------------------------------------------------------------------------------------------------------------------------------------------------------------------------------------------------------------|
| Disability <sup>87</sup><br>Potentially sex                     | Mean (SD):<br>42 (20)/<br>-Acute<br>-Rehab discharge<br>-Mean (SD) interval between injury and rehab admission: 14 (7) d                             | -Marital status<br>-Race<br>-Insurance<br>-SES<br>-Education<br>-Employment status     | Female persons have worse functional outcomes, as measured by the FIM at discharge from rehab and 1 y post injury.<br><br>Sex not associated with functional outcomes, as measured by the DRS at discharge from rehab and 1 y post injury or the GOSE 1 y post injury. |
| Disability <sup>88</sup><br>Potentially sex                     | Mean (SD) (at injury):<br>30.9 (11.2)/<br>-Chronic<br>-1, 2, 5 y                                                                                     | -Relationship status<br>-Education<br>-Pre-injury employment status<br>-Occupation     | Sex not associated with disability at 1, 2, and 5 y post injury, as measured by the GOSE.                                                                                                                                                                              |
| Favorable outcome by GOS <sup>91</sup><br>Sex/gender<br>OR (CI) | Mean (SD):<br><u>Male persons</u><br>50.4 (21.5)<br><u>Female persons</u><br>61.4 (22.6)/<br>-Chronic<br>-6 m                                        | None                                                                                   | Sex/gender not associated with ICU survival, hospital survival, or favourable outcome (GOS).                                                                                                                                                                           |
| Life satisfaction <sup>98</sup><br>Potentially sex              | Mean (SD):<br>35.87 (16.14)/<br>-Chronic<br>-1, 2, 5, 10 y                                                                                           | - Race<br>-Relationship status<br>-Employment status<br>-Annual earnings<br>-Education | Sex not associated with life satisfaction post injury or over time.                                                                                                                                                                                                    |
| Social participation <sup>58</sup><br>Potentially sex           | Frequency of age groups:<br>-16-24 (27%)<br>-25-34 (18.6%)<br>-35-44 (18.8%)<br>-45-54 (12.3%)<br>-55-64 (7.1%)<br>-65+ (16.2%)/<br>-Chronic<br>-1 y | -Relationship status<br>-Ethnicity<br>-Governmental funding<br>-Employment at injury   | Female persons have greater overall disability in social participation and in the domains of cognitive independence, mobility, and occupation.<br><br>Sex not associated with physical independence, social integration, and economic self-sufficiency.                |
| Cognitive functioning <sup>56</sup>                             | Mean (SD):<br>34.37 (13.80)/                                                                                                                         | -Education                                                                             | When considering weighted GRS, female persons display poorer cognitive functioning.                                                                                                                                                                                    |

|                                                                   |                                                                                                                                                                                    |                                                          |                                                                                                                                                                                                                                                                          |
|-------------------------------------------------------------------|------------------------------------------------------------------------------------------------------------------------------------------------------------------------------------|----------------------------------------------------------|--------------------------------------------------------------------------------------------------------------------------------------------------------------------------------------------------------------------------------------------------------------------------|
| Sex/gender                                                        | -Chronic<br>-6, 12 m                                                                                                                                                               |                                                          | Sex/gender not associated with cognitive functioning in the unweighted and semi-weighted GRS models.                                                                                                                                                                     |
| Disability <sup>75</sup><br>Sex/gender                            | Mean (SD):<br><u>Male persons</u><br>43.0 (18.6)<br><u>Female persons</u><br>53.7 (22.8)/<br>-Chronic<br>-6 m                                                                      | None                                                     | Sex/gender not associated with poor outcome likelihood, but when stratified by age, Female persons younger than 60 have poorer outcomes than Male persons, as measured by GOS.<br><br>Sex/gender not associated with outcome in those 60 and older.                      |
| Disability <sup>29</sup><br>Sex/gender                            | Mean (SD):<br><u>Male persons</u><br>33.8 (16.3)<br><u>Female persons</u><br>43.3 (23.1)/<br>-Chronic<br>-6 m                                                                      | None                                                     | Female persons less likely to have a good outcome, as measured by the GOSE.                                                                                                                                                                                              |
| Disability <sup>109</sup><br>Life satisfaction<br>Potentially sex | Mean (range, SD):<br><u>Whole sample</u><br>26.85 (16-50, 9.11)<br><u>Male persons</u><br>27.06 (16-50, 8.97)<br><u>Female persons</u><br>26.30 (16-50, 9.49)/<br>-Chronic<br>-1 y | -Race<br>-Family income<br>-Education<br>-Marital status | Sex not associated with life satisfaction or motor functioning autonomy.<br><br>Female persons have better outcomes for cognitively medicated activities.                                                                                                                |
| Cognitive functioning <sup>89</sup><br>Sex/gender                 | Mean (SD):<br>65.02 (6.34)/<br>-Acute<br>-Chronic<br>Mean (SD) time since injury:<br>20.90 (34.92) m                                                                               | -Education<br>-Residence (urbanization)                  | Male persons associated with better clinical dementia rating scores and performance in some cognitive functioning domains: confrontational and generative naming.<br><br>Sex/gender not associated with functional outcome, as measured by the Clinical Dementia Rating. |

|                                        |                                                                                                                                                                                   |                                                        |                                                                                                                                                                                                                                                                                                                                                                                                                                                                                                                  |
|----------------------------------------|-----------------------------------------------------------------------------------------------------------------------------------------------------------------------------------|--------------------------------------------------------|------------------------------------------------------------------------------------------------------------------------------------------------------------------------------------------------------------------------------------------------------------------------------------------------------------------------------------------------------------------------------------------------------------------------------------------------------------------------------------------------------------------|
| Disability <sup>90</sup><br>Sex/gender | Mean (SD):<br><u>Male persons</u><br>36.2 (17.4)<br><u>Female persons</u><br>39.9 (20.7)/<br>-Chronic<br>-6 m                                                                     | None                                                   | Female persons more likely to experience a bad outcome, as measured by GOSE.<br><br>Sex/gender by age effect:<br><br>Sex/gender not associated with outcome for people aged less than 30, as measured by GOSE.<br><br>Female persons 30 and older more likely to experience a bad outcome than Male persons.<br><br>Sex/gender not associated with functional status, as measured by the FSE, in any of the models, except for one involving people 30 or older. Here, female persons displayed poorer outcomes. |
| Disability <sup>92</sup><br>Sex/gender | Mean (SD):<br>40.6 (19.9)<br>-Chronic<br>-1 y                                                                                                                                     | -Race<br>-Employment status at injury<br>-Funder       | Female persons have worse outcomes with respect to physical independence, community integration, and health perception.                                                                                                                                                                                                                                                                                                                                                                                          |
| Disability <sup>93</sup><br>Sex/gender | Mean (range, SD):<br><u>At injury</u><br>39.8 (15-84, 14.9)<br><u>At assessment</u><br>49.1 (17-92, 15.1) /<br>-Chronic<br>-Mean (range, SD) time since injury: 9.3 (1-55, 8.4) y | -Education                                             | Sex/gender not associated with outcome, as measured by GOSE.                                                                                                                                                                                                                                                                                                                                                                                                                                                     |
| Disability <sup>94</sup><br>Sex/gender | Mean (SD):<br><u>Female persons</u><br>55.1 (18.9)<br><u>Male persons</u><br>46.4 (18.6)/<br>-Acute<br>-12 w                                                                      | -Pre-injury living situation<br>-Pre-injury employment | Sex/gender not associated with outcome, as measured by GOS, living situation, or employment                                                                                                                                                                                                                                                                                                                                                                                                                      |



|                                                                         |                                                                                                                                                                                  |                                                                                                                            |                                                                                                                                                                     |
|-------------------------------------------------------------------------|----------------------------------------------------------------------------------------------------------------------------------------------------------------------------------|----------------------------------------------------------------------------------------------------------------------------|---------------------------------------------------------------------------------------------------------------------------------------------------------------------|
| Disability <sup>95</sup><br>Quality of life <sup>95</sup><br>Sex/gender | Mean (SD):<br><u>At injury</u><br>35.6 (13.1)<br><u>At assessment</u><br>38.8 (13.2)/<br>-Chronic<br>-1 – 6 y                                                                    | -Change vs. no change in social participation post injury<br>-Suitability of family support<br>-Psychosocial reintegration | Female persons have worse physical function outcomes as related to quality of life.<br><br>Sex/gender not associated with social quality of life components.        |
| Return to work <sup>96</sup><br>Sex/gender                              | Mean (range, SD):<br><u>Whole sample</u><br>39.2 (15-78, 17.8)/<br>-Chronic<br>-Mean (SD) time since injury:<br>Minor/mild TBI<br>6 m (2 w)<br>Moderate-severe TBI<br>12 m (4 w) | None                                                                                                                       | Sex/gender associated with RTW only in minor TBI.                                                                                                                   |
| Cognitive functioning <sup>103</sup><br>Sex/gender                      | Mean (SD) (baseline):<br><u>20s</u> : 22.61 (1.51)<br><u>40s</u> : 42.62 (1.49)<br><u>60s cohort</u> : 62.51 (1.51)/<br>-Chronic<br>-NR                                          | None                                                                                                                       | Male persons in their 20s performed worse than female in the same age group in verbal ability.<br><br>Sex/gender not associated with verbal ability in 40s and 60s. |
| Positive head CT scan <sup>59</sup><br>Sex/gender                       | Median (IQR):<br>39 (24-55)<br>-Acute<br>-NR (during hospital stay)                                                                                                              | -Race<br>-Insurance coverage                                                                                               | Sex/gender not associated with positive CT scan findings.                                                                                                           |
| Neck injury comorbidity with concussion <sup>71</sup><br>Sex/gender     | Frequency of neck injury in concussion across age groups:<br><u>Male persons</u><br>58.13%<br><u>Female persons</u><br>41.87%/<br>-Acute<br>-NR (at hospital entry)              | -Income<br>-Rurality                                                                                                       | Female persons of reproductive ages more likely than Male persons to sustain comorbid neck injury with concussion.                                                  |

|                                                                                                        |                                                                                                                                                                                                                |            |                                                                                                                                                                                                                                               |
|--------------------------------------------------------------------------------------------------------|----------------------------------------------------------------------------------------------------------------------------------------------------------------------------------------------------------------|------------|-----------------------------------------------------------------------------------------------------------------------------------------------------------------------------------------------------------------------------------------------|
|                                                                                                        |                                                                                                                                                                                                                |            |                                                                                                                                                                                                                                               |
| <p>Intrinsic functional connectivity of resting-state networks<sup>69</sup></p> <p>Potentially sex</p> | <p>Mean (SD) (baseline):</p> <p><u>Male persons</u></p> <p>35.4 (9.7)</p> <p><u>Female persons</u></p> <p>35.6 (9.4)/</p> <p>-Acute</p> <p>-NR (at hospital entry)</p>                                         | -Education | <p>Male persons had greater intrinsic functional connectivity in motor/ executive functions, ventral stream, and cerebellum networks post- mTBI</p> <p>Female persons had greater connectivity in the visual network post mTBI.</p>           |
| <p>Systolic blood pressure<sup>80</sup></p> <p>Sex/gender</p>                                          | <p>Mean (SD):</p> <p><u>Male persons</u></p> <p>44.8 (21.6)</p> <p><u>Female persons</u></p> <p>40.7 (17.3)/</p> <p>-Acute</p> <p>-NR (during hospital stay)</p>                                               | None       | Factors related to changes in systolic blood pressure increase in male persons.                                                                                                                                                               |
| <p>Cerebral oxygenation after red blood cell transfusion<sup>73</sup></p> <p>Sex/gender</p>            | <p>Mean (SD):</p> <p><u>Whole sample</u></p> <p>35.4 (15.9)</p> <p><u>Male persons</u></p> <p>32.8 (13.9)</p> <p><u>Female persons</u></p> <p>45.5 (19.4)/</p> <p>-Acute</p> <p>-NR (during hospital stay)</p> | None       | Female persons exhibit greater cerebral oxygenation in response to red blood cell transfusion.                                                                                                                                                |
| <p>CSF markers of damage<sup>78</sup></p> <p>Sex/gender</p>                                            | <p>Mean (SD):</p> <p>31.5 (1.7)/</p> <p>-Acute</p> <p>-1-3 d</p>                                                                                                                                               | None       | Male persons exhibit greater oxidative damage and an increase in oxidative damage markers over three days, while female persons exhibit a decrease.                                                                                           |
| <p>CSF markers of damage<sup>79</sup></p> <p>Sex/gender</p>                                            | <p>Mean (SD):</p> <p><u>Whole sample</u></p> <p>31.49 (1.80)</p> <p><u>Male persons</u></p> <p>31.42 (2.04)</p> <p><u>Female persons</u></p>                                                                   | None       | <p>Sex/gender interacts with DAT (DA transporter) genotype in Female persons:</p> <p>Those with 10/10 genotype have higher DA (potential marker of oxidative injury) levels than 9/10 and 9/9 genotypes (no interaction in Male persons).</p> |

|                                                        |                                                                                                                                                                                                                                |                                                            |                                                                                                                                                                        |
|--------------------------------------------------------|--------------------------------------------------------------------------------------------------------------------------------------------------------------------------------------------------------------------------------|------------------------------------------------------------|------------------------------------------------------------------------------------------------------------------------------------------------------------------------|
|                                                        | 31.73 (3.99)/<br>-Acute<br>-1-5 d                                                                                                                                                                                              |                                                            | Female persons have higher levels of DOPAC (product of DA), but levels do not differ from normative values.<br><br>Sex/gender not associated with HVA (DA metabolite). |
| Neurosurgical intervention <sup>59</sup><br>Sex/gender | Median (IQR):<br>39 (24-55)<br>-Acute<br>-NR (during hospital stay)                                                                                                                                                            | -Race<br>-Insurance coverage                               | Male persons more likely than female to undergo neurosurgical intervention.                                                                                            |
| Discharge destination <sup>72</sup><br>Sex/gender      | Mean age (SD)<br>Pre-Medicare's inpatient rehab facility prospective payment system: 35 (22.5)<br>Post: 37.0 (23.5)/<br>Acute                                                                                                  | -Race<br>-Insurance<br>- Prospective payment system status | Male persons less likely to be discharged to inpatient rehabilitation.                                                                                                 |
| Discharge destination <sup>105</sup><br>Sex/gender     | Median age group:<br><u>Male persons</u><br>70-74<br><u>Female persons</u><br>75-79/<br>-Acute (at hospital discharge)<br>-Mean (SD) stay length<br><u>Male persons</u><br>17.0 (25.2)<br><u>Female persons</u><br>17.0 (26.5) | None                                                       | Female persons more likely to be discharged to a care facility rather than their home.                                                                                 |
| Care <sup>92</sup><br>Sex/gender                       | Mean (SD):<br>40.6 (19.9)<br>-Chronic<br>-1 y                                                                                                                                                                                  | -Minority status<br>-Pre-injury working status<br>-Funding | Female persons more likely to receive rehabilitation and use services in the community.<br>Sex/gender not associated with admission to LTC.                            |
| Mortality <sup>80</sup><br>Sex/gender                  | Mean (SD):<br><u>Male persons</u><br>44.8 (21.6)<br><u>Female persons</u><br>40.7 (17.3)/<br>-Acute                                                                                                                            | None                                                       | Factors associated with mortality are the same for both sexes with TBI, with the exception of SBP $\geq$ 160 mmHg for males.                                           |

|                                                                           |                                                                                                                                                                                                                                    |      |                                                                                                                                                                      |
|---------------------------------------------------------------------------|------------------------------------------------------------------------------------------------------------------------------------------------------------------------------------------------------------------------------------|------|----------------------------------------------------------------------------------------------------------------------------------------------------------------------|
|                                                                           | -NR (during hospital stay)                                                                                                                                                                                                         |      |                                                                                                                                                                      |
| Mortality <sup>100</sup><br>Sex/gender                                    | Mean (SD):<br>44.6 (21.8)<br>Median (range):<br>42 (14-89)<br>-Acute<br>-NR (during hospital stay)                                                                                                                                 | None | Female persons associated with reduced mortality and fewer complications.                                                                                            |
| Mortality <sup>101</sup><br>Sex/gender                                    | Frequency of age groups:<br><u>Whole sample</u><br>-15-49 (73%)<br>-50+ (27%)<br><u>Male persons</u><br>-15-49 (77%)<br>-50+ (23%)<br><u>Female persons</u><br>-15-49 (59%)<br>-50+ (41%)/<br>-Acute<br>-NR (during hospital stay) | None | Sex/gender not associated with mortality in all but two age groups: 50-59 and 70+.<br>In these two age groups, being a female was associated with reduced mortality. |
| ICU survival,<br>hospital survival <sup>91</sup><br>Sex/gender            | Mean (SD):<br><u>Male persons</u><br>50.4 (21.5)<br><u>Female persons</u><br>61.4 (22.6)/<br>-Acute<br>-In hospital                                                                                                                | None | Sex/gender not associated with ICU or hospital survival.                                                                                                             |
| Withdrawal of life<br>sustaining<br>therapies <sup>76</sup><br>Sex/gender | Mean (SD):<br>50.7 (21.7)/<br>-Acute<br>-Median (IQR):<br>3 (1 – 7) d                                                                                                                                                              | None | Sex/gender not associated with withdrawal of life-sustaining therapies.                                                                                              |

|                                                                  |                                                                                                                                                                                 |                            |                                                                                                                                                                                  |
|------------------------------------------------------------------|---------------------------------------------------------------------------------------------------------------------------------------------------------------------------------|----------------------------|----------------------------------------------------------------------------------------------------------------------------------------------------------------------------------|
| Mortality <sup>75</sup><br>Sex/gender                            | Mean (SD):<br><u>Male persons</u><br>43.0 (18.6)<br><u>Female persons</u><br>53.7 (22.8)/<br>-Chronic<br>-6 m                                                                   | None                       | Sex/gender not associated with mortality.                                                                                                                                        |
| Mortality <sup>55</sup><br>Sex/gender                            | Mean (SD):<br><u>Whole sample</u><br>45.3 (22.1)<br><u>Male persons</u><br>43.0 (20.7)<br><u>Female persons</u><br>50.8 (26.6) /<br>-Acute (during hospital stay)<br>-1-75 days | None                       | Being a female associated with increased mortality.                                                                                                                              |
| Mortality <sup>29</sup><br>Sex/gender                            | Mean (SD):<br><u>Male persons</u><br>33.8 (16.3)<br><u>Female persons</u><br>43.3 (23.1)/<br>-Chronic<br>-6 m                                                                   | None                       | Sex/gender not associated with mortality, except for those females > 60 (increased mortality).                                                                                   |
| Mortality <sup>99</sup><br>Sex/gender                            | Mean (SD):<br><u>Male persons</u><br>76.8 (7.5)<br><u>Female persons</u><br>78.9 (7.7)<br>-Acute (at hospital discharge)<br>-Stay lengths in days                               | -Race                      | <u>Isolated TBI (no injury to other body regions):</u><br>Sex/gender not associated with mortality.<br><br><u>All TBIs:</u><br>Being a female associated with reduced mortality. |
| Mortality 12 years<br>after TBI <sup>108</sup><br><br>Sex/gender | Mean (SD):<br>42.8 (25.3)/<br><br>Up to 12 years from hospital discharge                                                                                                        | -Race<br>-Insurance status | Female persons have a lower risk of death with TBI.                                                                                                                              |
| Mortality <sup>102</sup>                                         | Mean (SD): 69 (1)/                                                                                                                                                              | None                       | Sex/gender not associated with mortality.                                                                                                                                        |

|                                                                                                                                                       |                                                                                                                                                                                                                                                          |                                                                                 |                                                                                                                                                                                                                                                                                                                         |
|-------------------------------------------------------------------------------------------------------------------------------------------------------|----------------------------------------------------------------------------------------------------------------------------------------------------------------------------------------------------------------------------------------------------------|---------------------------------------------------------------------------------|-------------------------------------------------------------------------------------------------------------------------------------------------------------------------------------------------------------------------------------------------------------------------------------------------------------------------|
| Sex/gender                                                                                                                                            | -Acute (during hospital stay)<br>-Mean (SD) length of stay:<br>8 (0.4) d                                                                                                                                                                                 |                                                                                 |                                                                                                                                                                                                                                                                                                                         |
| Perceived inadequacy <sup>17</sup><br><br>Sex/gender                                                                                                  | Range:<br>33-46/<br>-Chronic<br>-Residential facility                                                                                                                                                                                                    | None                                                                            | Male persons expressed more feelings of sex inadequacy post-injury and depended more heavily on traditional sex-specific activities before and after injury to define and support sex role.<br><br>Female persons relied more on cross-sex activities and were able to maintain more pre-injury activities post-injury. |
| Perceived dependence, self-identity, and esteem <sup>84</sup><br><br>Gender<br><br>TBI severity frequencies:<br>-Mild (50%)<br>-Moderate-severe (50%) | Mean (SD)<br>Acute:<br><u>Male persons</u><br>48.6 (19.9)<br><u>Female persons</u> 42.9 (22.7)<br>Chronic:<br><u>Male persons</u><br>50.8 (14)<br><u>Female persons</u><br>44.1 (16.8)/<br>-Acute and chronic (<6 months post-injury)<br>-Rehab hospital | -Ethnicity<br>-Education<br>-Level of femininity/masculinity<br>-Marital status | Gendered pre-injury roles and responsibilities are disturbed post-injury in both genders. Female persons feel guilt and male persons feel emasculated. New roles and responsibilities not formed yet and many are taken on by significant others. Both genders are dependent on others.                                 |

*Abbreviations:* AIS: Abbreviated Injury Scale; ASDS: Acute Stress D/O Scale; ASDS-DISS: Acute Stress D/O Scale-Dissociative Score; AUD: Alcohol Use D/O; BDI-II: Beck Depression Inventory II; CI: confidence interval; CPP: cerebral perfusion pressure; CT: computed tomography; DAT: DA transporter; DSM: Diagnostic and Statistical Manual of Mental Disorders; FIM: Functional Independence Measure; GCS: Glasgow Coma Scale; GOSE: Glasgow Outcome Scale Extended; GRS: gene risk score; ICU: intensive care unit; ISS: injury severity score; LOC: loss of consciousness; LOS: length of stay; MRI: magnetic resonance imaging; mTBI: mild traumatic brain injury; MVA: motor vehicle accident; NR: not reported; PPS: prospective payment system; PTA: post-traumatic amnesia; PTSD: Post-Traumatic Stress D/O; REM: rapid eye movement; RTW: return to work; SBP: systolic blood pressure; SCI: spinal cord injury; SD: standard deviation; SDMT: Symbol Digit Modalities Test; SES: socioeconomic status; SSRI: Selective serotonin reuptake inhibitor; SUB: Substance Use D/O; and TBI: traumatic brain injury.

**Supplementary Figure 1: Effect sizes of factors/variance explained by factors investigated in relation to post-TBI outcomes in multivariate regression analyses.**

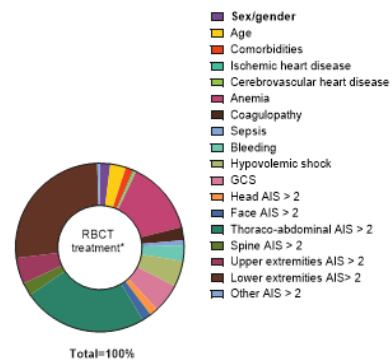

(Boutin et al., 2017) A, M, S  
Gender inequality index rank of study origin: 18

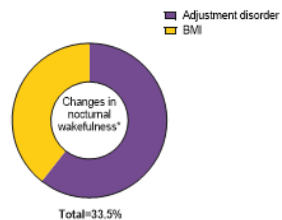

(Molayeva et al., 2017b) C, M  
Gender inequality index rank of study origin: 18

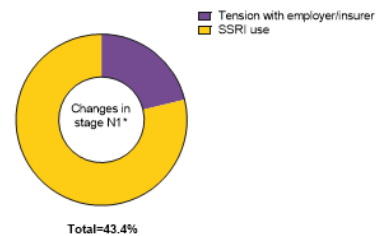

(Molayeva et al., 2017b) C, M  
Gender inequality index rank of study origin: 18

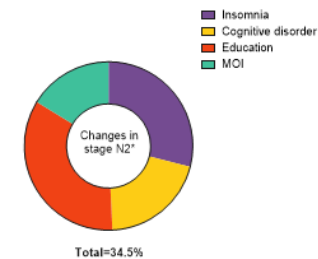

(Molayeva et al., 2017b) C, M  
Gender inequality index rank of study origin: 18

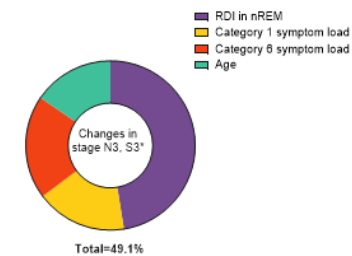

(Molayeva et al., 2017b) C, M  
Gender inequality index rank of study origin: 18

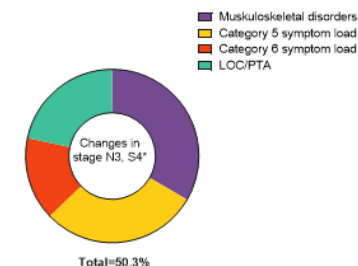

(Molayeva et al., 2017b) C, M  
Gender inequality index rank of study origin: 18

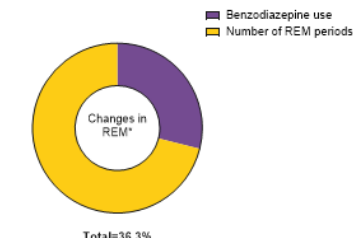

(Molayeva et al., 2017b) C, M  
Gender inequality index rank of study origin: 18

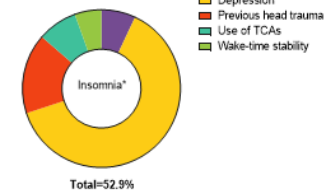

(Molayeva et al., 2016a) C, M  
Gender inequality index rank of study origin: 18

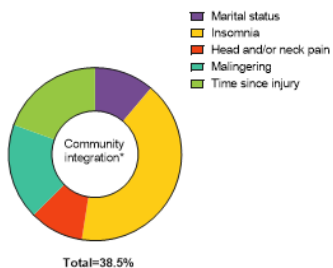

(Molayeva et al., 2015) C, M  
Gender inequality index rank of study origin: 18

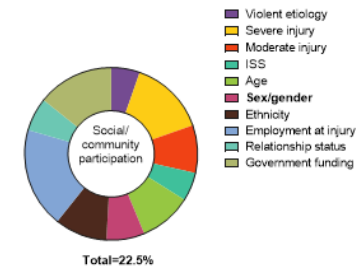

(Gerhart et al., 2003) C, S  
Gender inequality index rank of study origin: 43

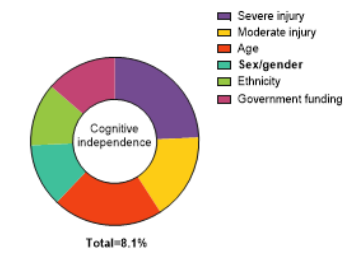

(Gerhart et al., 2003) C, S  
Gender inequality index rank of study origin: 43

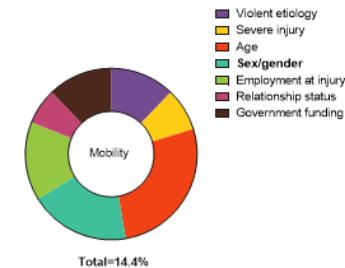

(Gerhart et al., 2003) C, S  
Gender inequality index rank of study origin: 43



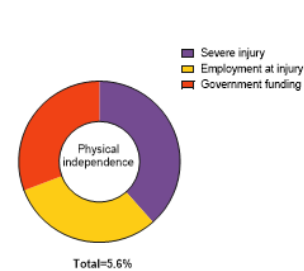

(Gerhart et al., 2003) C, S  
Gender inequality index rank of study origin: 43

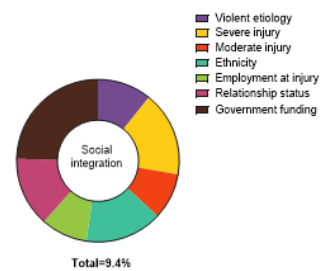

(Gerhart et al., 2003) C, S  
Gender inequality index rank of study origin: 43

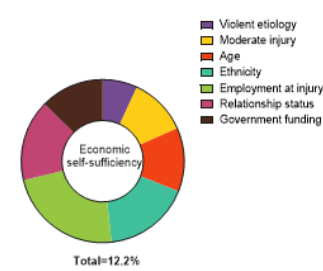

(Gerhart et al., 2003) C, S  
Gender inequality index rank of study origin: 43

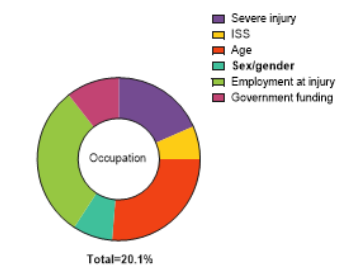

(Gerhart et al., 2003) C, S  
Gender inequality index rank of study origin: 43

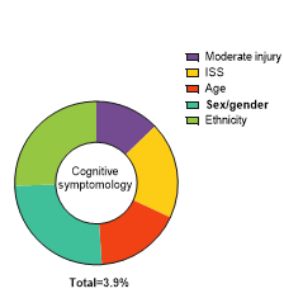

(Gerhart et al., 2003) C, S  
Gender inequality index rank of study origin: 43

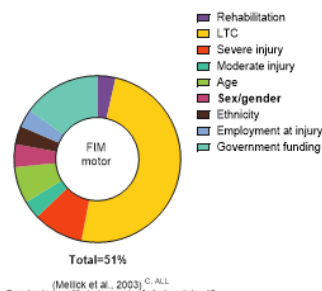

(Mellick et al., 2003) C, ALL  
Gender inequality index rank of study origin: 43

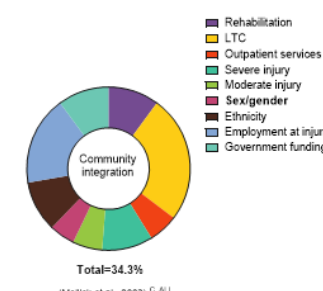

(Mellick et al., 2003) C, ALL  
Gender inequality index rank of study origin: 43

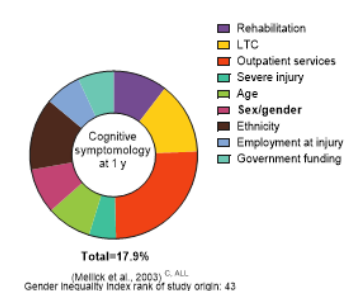

(Mellick et al., 2003) C, ALL  
Gender inequality index rank of study origin: 43

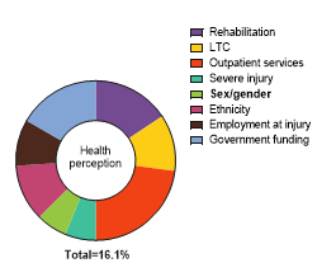

(Mellick et al., 2003) C, ALL  
Gender inequality index rank of study origin: 43

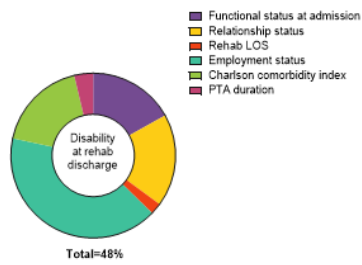

(Dahdah et al., 2016) A, M-S  
Gender inequality index rank of study origin: 43

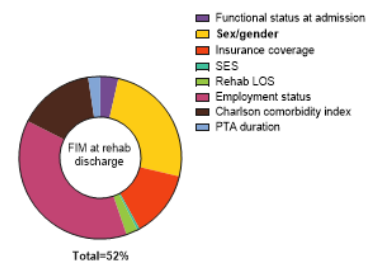

(Dahdah et al., 2016) A, M-S  
Gender inequality index rank of study origin: 43

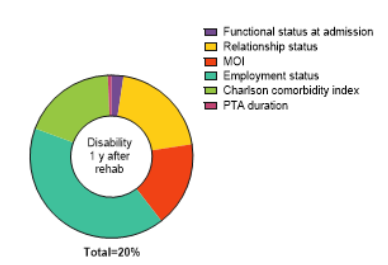

(Dahdah et al., 2016) C, M-S  
Gender inequality index rank of study origin: 43

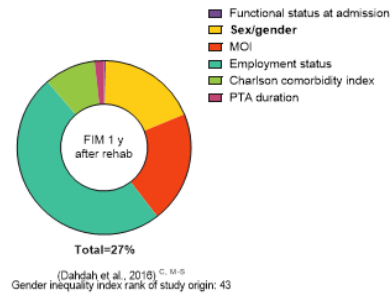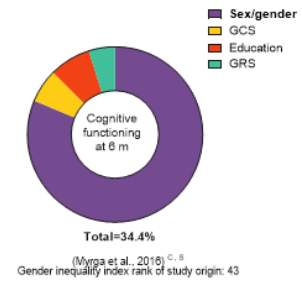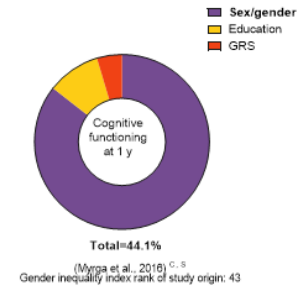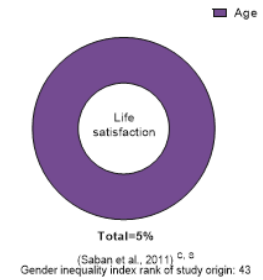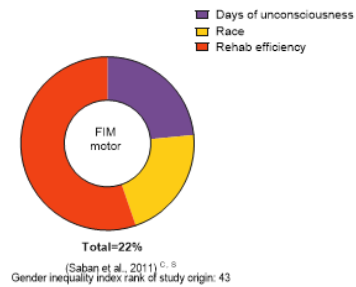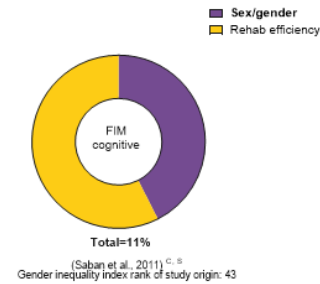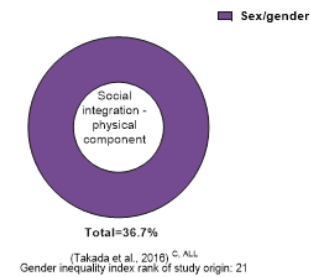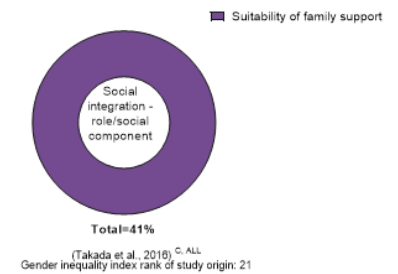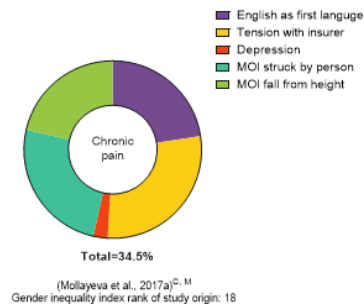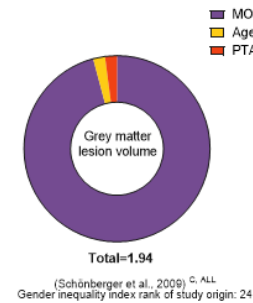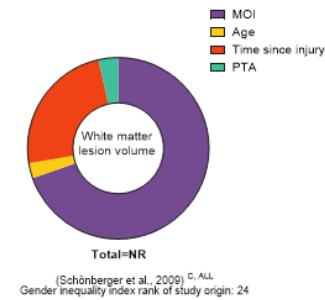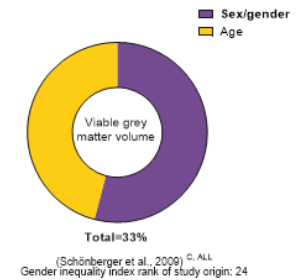

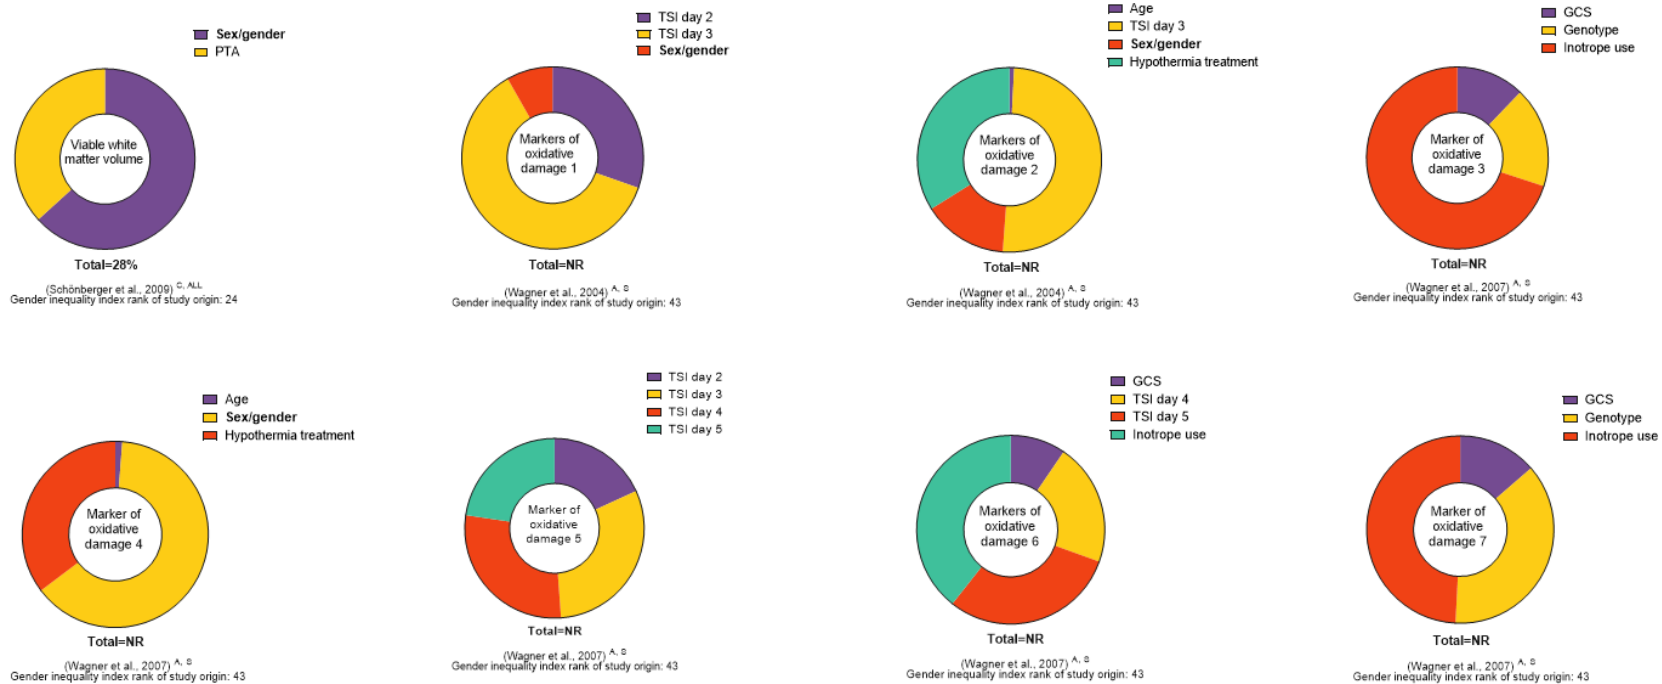

*Notes:* For outcomes marked with \*, proportions correspond to partial R2. For all other outcomes, the proportions correspond to  $\beta$  coefficients. Only statistically significant factors included as explaining variance given that cut-off p-values not consistently reported. Superscripts indicate post injury phase (acute (A), chronic (C), not reported (NR)), and injury severity (mild (M), moderate-severe (M-S), severe (S), all severities (ALL)).

Oxidative damage markers: 1: Isoprostane/lactate/pyruvate; 2: isoprostane/glutamate; 3: dopamine (DA); 4: 3,4-dihydroxyphenylacetic acid (DOPAC, DA product); 5: homovanillic acid (HVA, DA metabolite); 6: DOPAC/DA (indicator of metabolic turnover); 7: HVA/DA (indicator of metabolic turnover).
